# Supplementary material for: An Ancient Enzyme Finds a New Home: Prevalence and Neofunctionalization of Trypsin in Marine Phytoplankton
Source: Research Square preprint supplement (doi:10.21203/rs.3.rs-1008417/v1), 2021-11-16
Supplement: Supplementary file 1 [file b2acfb7cf9b6bc9c805eb7ca.xlsx]

## Sheet: Supplementary Table 1
Supplementary Table 1 Gene characteristics of algal trypsin genes.
Gene name	Gene ID	Gene length (bp)	Genomic location	Amino acid (aa)	pI	MW (kDa)	Protein sequence
TpTryp1	THAPSDRAFT_875	3877	Chr.1: 43897-47773	1058	5.33	113.618	MTVLGRDVSAIIGLLLVSQQLDTSYAFNNGVLPSASFNHRISSSSSSSSSRTLQCPNAHSSPPSPSSATTSTTLFNILRDYAIYNSPPNDPYDSDATSSNWRKNAGYSSGKSNPLGGSITPYGAQRDMETNPYYDAGWAQSVRRDNPNSNFESKSNYNGYNDPYDYTNRFYNTPSTYPGMTSPERSNKIYSNPVNPYYDPLWSQSYLQGRDPSNVREGMFYEGNYGNGVSGMGGYYPEYGGGGGMMYGNEYYGRGGGYYGGYGNGGSMMGGGFNNYYRGGGYGRDQGPGRRMYAVGTKSGESGVKSLNGNSLMRAKTSSSTGMTRTSTLLRMSYYGDEWGGPPFDPRMPPMMMPPPGYGGGGYGRGGGGMMREPGLRELADMAAGGEMNGNVRRGSSQR…
TpTryp2	THAPSDRAFT_31035	1479	Chr.1: 1528954-1530432	493	5.07	54.1014	TLDSVVKIYATHSEPDFLIPWQKRHQTTSTSSGFVIDVPGIGFRVMTNAHSVEYGSVVQVQGRGEDEKHAAVVEAVGNECDLALLRVDSMFPPDMTYDDDSAPFAMPLGPLPSLQDEVEVLGYPAGGDSLCVTKGVVSRIEMQEYAQAGARLMAMQIDAAINPGNSGGPVVNAELEVVGVAFQGLDEESIENCGYVVPISVVRHFLEDVRRNNQYTGFCHLGLDVMFLENQAFRKFLKLGQDDGKNVRRRSTGVVVRRVQPTSGAFGILKSMDVVMEVDGIPVGNDGKIPFRRGERVDLGGYISSLFEGDNANVKIWREGKEMEVTIPLRTIKHLVPSHFDNKPPPYLICSGFVFTKLSVPYLEAKGAWDTYYTDDVSYLLGLVNAPLKQEGDEVVVLA…
TpTryp3	THAPSDRAFT_20953	8325	Chr.1: 2182005-2190329	2465	4.82	271.869	MKRRKTMKRPAAATVVCCCLAAASSISAVTSSSINGARPPPSKLSKRQRRRLPEDHKKGHSYEASVQDKGFDEEENQSLGMLMLGSSSNSGGSRPETEQPSDGTDAADAISANSASEPATSLSPYTRISGAGSYSISSPDRFPYMASFQIEGTNAQSGSYDYHMCGGFLVAPDIIMTAAHCATYSPAGSDEVYQAFNGIEIGRLNLGEEKAYDAFENESYRLNYENLIPEKLMKHPKYDEVTMEHDLMLVKVFGKSRYPVVNVNSEASAPHDGERVTVLGWGATEGNSGKKYSDEMKEADLNIVSNQDCRNTQVDVTDPTTGQTSSMSLQDHIFDDMMCASAFGRHICYGDAGGPVISRGNDEGGADDTVLGIISWGYGCVNPDYPAVITRISSHYQWI…
TpTryp4	THAPSDRAFT_32971	177	Chr.3: 449158-449334	60	6.04	6.40128	MYLTASLFTTGGPIIFAGREAEDDVQVGLASWGIGCASPSFPGVYSRISSEYKWIRNKV
TpTryp5	THAPSDRAFT_261825	970	Chr.3: 1169235-1170204	223	4.72	23.5294	RIIGGGMVRAGRFPYAVSLQDDVGHFCGGSLIAKDVVLTAAHCSTNKYSVVIGTNSIRSKTGGDRVTVKDDDLHPNYNWRVTNNDFMLVFLARETTADVTPVRLNTVGSVPDVNDAVTVMGWGDTIATDNFITLSEYLLDVEVNVVSNKECASIVSYTGLITESMICAKDYYQDSCQGDSGGPLVVKGSNSDGAGDVLVGVVSWGIGCASPQFPGVYARVSS
TpTryp6	THAPSDRAFT_32596	354	Chr.3: 2195150-2195503	109	3.71	11.4306	VMGWGVTVEGVSSTQSDVLREVDVQYMTNTECDTSNGGYIEDNMMCAWSQSADACQGDSGGPLILKGSTTGEDVQVGVVSWGLGCAMATFPGVYSRISAEFDWIQSTV
TpTryp7	THAPSDRAFT_22549	5347	Chr.5: 223290-228636	1600	5.86	179.211	MSSDKRHTHSSQSQHSSSESLLTELVHIPPYKDRTLSAGSGYGHAAKKLPDPNETFENENGNGDVTPLPPSFSNRDVSNLSNQSTIDSALSSGSRGVLYTDSGPAYLEKLRRVKNLIEQCESTKFPFKKKLVLANMNLKYDDVPVKRICSDKLGATLNKLSLVGNHLISIPPPLLVKLTGLRALDLSQCNIKTVPETWDIPFLKKLNLSNNRLVEFPTENVFRGLPELQQLDIHGNKLCEIVLPKDLSVLSKLDYLDIGFNILLSLPDELSSLHTLKTLRCMNNILEIVPSTICDMDLRVLDVSSNPLLQPPLETCERGIESMRRYYHALKLEEQMAGTGPNKEPMPTNNKSIFKIGLKHERSRNKMRKKKDSVKKTFQASLCRTNLFRSASEPAHSTS…
TpTryp8	THAPSDRAFT_40831	2253	Chr.5: 1917681-1919933	325	4.29	34.2532	MMYSFGIKAALISQVLVWVVSANLFDVATKQTRIIGGSEAPTTRYSYTVALTQGGSNFFCGGTLIAPDVVLTAAHCMGGSYNVAIGRHDLTSNGGEEIAMSKEIKHPNYNTGTDENDFALVILSKPTTLDIPFVKLNSDESFPSAGTMSRSMGWGDMAQSDDKTEISDVLMEVDVPVITNDECSQASGTDGSYTDSYANYIYPSMLCTFESGKDACQGDSGGPLIVPGASDGEDVQVGVVSWGIGCATKVFPGVFSRVSHVYDWIQETVCSESSDPSASSLCGPPPTNPPTPKPSNQPTNQPTTPSSILFSNIVTIGISNFEPN
TpTryp9	THAPSDRAFT_262659	1039	Chr.5: 2166048-2167086	271	4.16	28.9099	MSAIPSTFNRELNLFSAGDNARIIGGTEAQNKRYPYAVSLSYAGEHFCGGSLIAPDIVLTAGHCNGEYSIGGISYNVVVGRNDLSKPWTGESIKMSSEIRHPLYEEETVNNDFNLVLLTRKVSVTDVFVELNQDPSVPDDSGSSGDVLTVVGYGDTDPSDDLLLPSNVLMETDLQPVSNAECEQSQGLLNTQFGLAFTDLNGAISDNMMCARKDNVDACQGDSGGPLILTGSNATSDVQVGVVSWGLGCADNNFPGVYSRISSQYDWIRE
TpTryp10	THAPSDRAFT_34684	873	Chr.6: 722877-723749	291	4.9	31.0104	GQGSGIIVNNEGYILTNAHVVDGASRVYVLLTDGRRFKAELCGADDIVDVAVLKIIPEGVGKSNILDLPIAELGDSNQLEVGAFVTAIGSPGGLDNTCTIGIVSGLKRCPKVVGIPDKAGVLEYIQTDAAINQGNSGGPLVDVYTGDVVGINTCIRANMEGTSFAIPINKVMGIVDDLSEGKHITHGYLGVHMSTMNPTLAQYYNKLQQQQNGKKIPEKEGVMIEKVFQKSPAQEGGLKKFDFVTEIGGQRVEKADDAHVIIDRATIGEELSIKVLRDDVELTVQVKPEDL
TpTryp11	THAPSDRAFT_262856	729	Chr.6: 936371-937099	235	5.22	25.4235	PRIIGGFDTDDSRYTHTVSLQDRSGNHFCGGSLIAKDVVLTAAHCSEKVMGTNQATIVVIGRHDLTDERSGEELIVREEKIHPKHLNSVEFDYDVALLFLERPTMTRGDVLTLNSDSNTPSGWDQVTVLGWGDTNVDGFGDDLSDVLQEAALRVVPSNKCEKISYKGFIADSMICAKNKNRDSCQGDSGGPLILKGKNGKTDVQVGLVSWGVGCADAQFPGVYARVSSAYSWIR
TpTryp12	THAPS_6684	2407	Chr.7: 228250-230656	771	4.91	83.4377	MSSLHPLHRRRRRRMSSPSSPALLSLLLATSLEGGSSSSSSSSTHLSGKPLIPTPRRTSEGGGGISAADELYQVRNHHHLTSTISNILSETTSNAKNDRLKRKKRRQLLKQRSLIVSGTAAPPGRFPYVVSLQSESVLDAATSALYNGEEVMDVPVCGGTLISSDVVLTAGHCGYEEQFQSAASLGESGANFGVRPKQIFDGADVGAYDLSNNDGGEGYVVDNMLFEKLIIHPDYTGFGGGDGGGSSQFALQHDVMLVKLYGASDQPMVRIHNPQLYESTGEKSQSHPTDGETLVVVGWGDTDPLPGEDNSKLAPILQAASVQYVPNDVCEESKGYSNIQTSTSNSFEDYFEYDGTISDDMMCALGNAQQDACQGDSGGGLLRLGDSFDGSNDVQLGIV…
TpTryp13	THAPSDRAFT_7372	1962	Chr.8: 82020-83981	525	4.7	56.0651	MSTGQPVLRVPTGDSYDEETRGDRHQQSCWSNVEGASTRSGCDMNTSTNQSNIITIMKFQVLLLQFILATSSTLMASAEAEGSFRYGDSEDDGNTRIIGGSQTQNGRYSYAVSLQDSLGHFCGGSLIAKDVVLTAAHCQGGSYNVVIGRHDLGSNSGESIPVKKEIPHPKYNDRTTDSDWNIVILSRPTTENVDLIQINSSGNSPSTGQDVTVMGWGDTIAADDAQKLSDVLMAVDVNVISNSDCDDSSGTINGWSDSYKGQITNNMLCAADRGQDCCQGDSGGPLVIRGNSASNDVQVGVVSWGIGCASANFPGVYARVSEAYDWIKQTVCSESSDPPAALCGGGNNNNPPSPSPPSPSPPSPSPPSPTPNSGNWRTILNEDFTNGYGSFKSGGQGAR…
TpTryp14	THAPSDRAFT_23662	2456	Chr.8: 84213-86668	639	4.09	67.2226	MKLYLSLSHIILVASTSWYTTSDAASSTATSSGGSIRGNSSKDGDRKLSLFADYTPHKKRSIERDADNGEGNSMNIDTIVPSTAAGIMETRIIGGSQTQNGRYSYAVSLQDSLGHFCGGSLIAKDVVLTAAHCQGGSYNVVVGRHDLTTNSGDSIPVKKEIPHPKYNDRTTDSDWNIVILSRPTTENVDLVQINSSGNSPSTGQDVTVMGWGDTIAADDAQKLSDALMAVDVNVISNSDCDDSSGTINGWSDSYKGQITNNMLCAADKFQDSCQGDSGGPLIIPGNGASSDVQVGVVSWGIGCASANFPGVYARVSEAYDWIKQTVCSESSDPPAALCGGSGNNPTPTPPSPTPPASTSYPTSTMGNGNDDVDQSSGSYPTHFPSNMGGGTDMPYNDDV…
TpTryp15	THAPSDRAFT_263451	792	Chr.8: 1042067-1042858	219	4.22	23.0463	SRIIGGTVSSIGRYSYAVSLQDSQYNHFCGGSLIAPDVVLSAAHCGGVVATVAVQRHNLNDRTVGDDVTVKYEVLHPQHDPRSTDNDFSLIFLSRSTTADVDLVQLNKDKSVPMSGDDVTVMGWGDTVAFDSIQQLSDTLKEVEVTAISNAECESYQGQITDNMLCAEDNGEDSCQGDSGGPLVLASSDESGDVQVGVVSWGIGCANSSFPGVYSRVS
TpTryp16	THAPSDRAFT_263452	926	Chr.8: 1045275-1046200	239	4.62	25.8755	TRIVGGSQVSYCRYSYTVSLQDSIGHFCGGSLIAKDVVLTAAHCQGGNYDVVINRHDLGTNTGDRIKMVKEIPHPKYNDRTTNYDFNLVFLDRPTNQNVALVNLNDNKNSPSVNEEVWVMGWGDTVADDYVQRLSDKLMDVSVNVISNGDCDASEGSINGQISDQMLCARDNNEDACQGDSGGPLVLRGNDNSGAKDVQVGVVSWGIGCASKSFPGVYSRVSEAYDWIKDEVCSRSSD
TpTryp17	THAPSDRAFT_269386	1818	Chr.8: 1047786-1049603	461	4.81	49.8779	MSNMRRLAFTILALVQLFAIASSQVRGGGDNNVALEKDEEERYLMSEHTRIIGGNQASAGSYSYAVSLQDSFGHFCGGSLIARDVVLTAAHCSGGSYSAIINRHDLTSKSTGDSIPMKKEVVHPNYNDRTTRNDFNLVFLERATDENVALVKVNSNDSLPSPGGSVVVMGWGDTTAADDKMWLSDTLRAVEVKVISNSECEKSEGEVNGFTDTYADQIFDSMLCASDPNQGECYACQGDSGGPLIQRGDSSNGSQDTIVGIVSWGIGCASPIFPGVYSRTSSAYSWIKQGSGNTSSKGNISSNNGNGWTKIVSEDFESGYGSFNDGGSDVAYYKNVKGRTGVIRIQDGNGRRSSVFSNKLDNSQTNFSQFRVNFSFFANSMETNDKFCLDYSVNGGTVW…
TpTryp18	THAPSDRAFT_263454	1113	Chr.8: 1050671-1051783	280	4.43	29.9266	AQTMMNLFVAASFLLIVACGGLLEGRFDSVTTKVIGGSEANDAQYPYTVALIAEGNAWFNGFVCGGTLVAKDVVLTAAHCLSRGSYYYNTVIGRHDVTSSEGEKIAIAKEIPHPEYDRETLDNDIALIILSQSTTHSIPFVKLNSDDSFPSPGFIARILGWGDVDPRDEVKLYSDVLMMADLPVISNEECSQAKGTTGKHTDDFDGKITSNMICTFDPSGVDGCHGDSGGPLIAPGSTPEEDIQIGVVSFGVGCATDIFPGVFSRVSRFYQWIEETVCN
TpTryp19	THAPSDRAFT_269395	1747	Chr.8: 1187340-1189086	488	5.02	51.6068	MYSALPLTITILLALQTNSSFITPMNRGIRWSSSNRLTRGPTSPLFIHSPSSVDADIDGSSQPINDDDDDGFTTSESAYVDSKCRRKMLTLAPAASLALLVGKLDAVDAAEVDTLPSTTTTPIITSTPQVNTALTTQLSSSRALLCAEEENRIAIFERVAPSVVYIDTFSEKRDVFSTNVMEVPIGSGSGYIWDKEGHIVTNFHVVQEAKSAQVAILTSVYKARVIGVDPTKDIAVLKIDAPINELRPIEVGTSQGLRVGQSSLAIGNPFGLDHTLTTGVISGIGREVKSPTGRPISNVIQTDAAINPGNSGGPLLDSAGRMIGMATAIYSPSGASAGVGFAIPADTVKYVVAMLIENGQIVRPLLGVSILDSKQARQALGISKGVLILEVKDGTPAAK…
TpTryp20	THAPSDRAFT_9286	1670	Chr.13: 21433-23102	464	4.56	50.4154	MLIKLLTSILLLSSSLATAQDILQSPISSSSHSVRVQRRQLKKDPVAVVGQGLSSPPQQQQQTEEKKSPVIVKGSESIVPKESVVDKMPVVKPTGNINVDKNDEPSTVDEENTSVVYVEKEDVPLTAIVTEKKDTVEKIEPEQTEGRRERPQRPTNMAAFDYDNIQSIIGGEEIVPGSRPYLLSIGADYFGHWCGASLISPHFALTAAHCLFYLGSWDPPTYVEFYRHSLMNDAGVTKMYFKNTDQCEGDVVFHPNYDDYTLENDVALLHLPNGIYDIEPVILNENSRVPLDGASLDVSGWGAIGFDENGTSVYTDVPQATTINYVTTEDCTSPPSPWQVGWITDSMMCAIDEVSSDCYGDSGGPLVLENVDGDGSAQPVVQVGIVSWGIYGCLNATAP…
TpTryp21	THAPSDRAFT_9289	1694	Chr.13: 28697-30390	438	4.52	46.8572	MLTKRITAAILISTLLSSNADDVHYRRSHHRKRNGDGGRGVIGHQPSPASTQVKGGHKALQMDSTVTAVKENKDDVSVDAIDIEEVQQVDHQSQSLNDDNIQTIIGGKEITPGSRPYLLSIGDDPYGQYCGASLITPHFALTAAHCVLSFGGVNKMYLKDTSQCVGDVYTHPEYNSYTIENDVALLYLPNGMYDIDPVQLNEDPNVPVDGSPLDLAGWGAYNITDYYSYYSNVPLSTTLNYVTNADCMSPPFIWQEGDITDSMMCAIDEDSSACYGDSGGPLVLANVNGDGPAQPVVQVGIVSWGIYGCLNATAPNVYTRISDVADWIKETVCGRSVANVGTDTRVDVATKYSMANMPPNTPWPTPVWPTYQPSMAPQVSLVSSPSTLDPQMTSGNAHC…
TpTryp22	THAPSDRAFT_24647	1598	Chr.13: 422140-423737	447	4.9	48.1277	MFTPTFSTPRCTGYNILHRQHAYHINHLNITNAGMFVTAWKLMLVGLVAEATAAGRGSSPKQPKQESPKQASSPTQPIHEPHRRGRTSSGTNSNQRSDEPGTASIVGGTEIEVGSMPYLTVTGIRIGGENYPLCAGTLISPRVVMTSARCNVYYDSDLEEYVWDPPTYVNFGTHNLDEEAGVVTMNLKDTSEGNTGSVLVHPDFSLDTFENDVTLLILPFAMTGIEPIKINLESSVPESGDVFSVTGWGSTSAESNTYNDVPLQAIVNYVSYDQCIEQYPEGWILESMMCAAAPGADACNGDNGAPLINEDGVQVGIASWGEDCANEDYPGVYTRLSEVANWIKETACEEVGELCDGTESPTKFPTTTTDSPTAFKTDSPTTSPSMKPTKQKKSKSSKA…
TpTryp23	THAPSDRAFT_9434	1565	Chr.13: 424009-425573	383	4.54	41.6199	MKQTTAWKLILTGIVAKSMAMDAPTSSERARRGRRGPPGDNHRSSQQSEFDLIVGGEEIEAGSRLYLAVTGVGGDFPYYPLCAGTLISPRVLMTASHCNWYYDDDVEEWIWDPPTYVNFGTHNLFEEAGVMTMNLKDTEEDVIQHPDYDVDLIRNDVTLLILPYPISDVKPVKLFDGMLQSGDPLDVAGWGATNEEGDEYSDVPRAVMVDYMTNEECVEYGSVEEEAITSAMLCALAPGKDACFGDSGGPLVLASESEGGPTAPVTQVGIVSWGGTECADPTHPGVYTRVSEMLPWIKETVCERTGDMCGDEETDVLTAAQSISPSASPTMKPTQKKRRPKASKKGGKANKQKSKPSKITDDETEMEMIAMQKVQTVLSVPL
TpTryp24	THAPSDRAFT_17228	636	Chr.13: 773350-773985	213	4.65	22.9208	FCGGTLIAKDVVLTAAHCLGYASFQAVIGRHDLTNKSVGDQVDVARIVVHPEWDNVSFENDFALLVLARTATASDAQLAKLNNNEGYPASGTTAHVMGWGDLEEDTDKYKASNVLMMVDTQVLTNQECREADGKLDGFNGSYEDFIFPDMICTLSKKQNACKGDSGGPLVVRGSSASMDVEIGIVSWSMPFGCATKTFPVVYSRVSNAYDWI
TpTryp25	THAPSDRAFT_9577	1458	Chr.13: 818518-819975	486	5.71	51.6419	MQNLLLLLLTLVSVVSWTSVNHAGGSKGHAVVAFVSPTLQPQSHRVPSPISSQTSTVYNAHRHHISSSSLYPRRRTISFTSQSSQSYISSRVDLSASSDANHLPTQTSAHQVAQSSLPSVALVLPVGVRNITARGSGFVVNFPLNGESSTTDNTHDIDDGRMSDDSTKQVLAREDATTLVYLLTAAHVAAPGYRIEVVFSSSDAEGIGEEGSFSGTTSIPASVVGRNDKSDLALLRVDLSDYIMNTAFFSSTTDAFDPPPPLKLSNKRAKVGTQAYSIGYPSGGVVGAAMTSGIVCGNARGLVTGRVAVGDTGKNETGGTTNDTTSIDERTRYIVTDAAMAGGMSGGPLVDSNGVVLGVNALINMELRALGNYAVDASECLEFLLRMSKRLGGSNDKQS…
TpTryp26	THAPSDRAFT_269726	1414	Chr.14: 114187-115600	370	4.54	39.8938	MEMNSRSHDGGPTHRSGVDTIDSSLRQRREMSKVRVPLHSHLQDLQTDGRYPSPSSESGSSSTVLSNSSSESASSRSSGSSNKGATPNPRIIGGSPPPNTNRYPYMVSLTYFGSHLCGGSLIAPDIILSAAHCAGYASSIELGRFDRTTGIPLTTDASLNQTIDYSSPNYGFDTEYYESIEVAYEIKHPSYNPDTVNNDFLLVKLIHPTTIQNHPLATLNSDPNIPTSSGEELHTMGWGDTDVDPDVFTPSATLLTVLLNYVPNYECVVKEGYVITSFDIPSVTDNMLCAMDLPNGNVAADTINDVDQDTCQGDSGSPIVLSKSDSWEDDVQVGVVSWGIGCTSPVFPGVYSRISSQYDWIKETVCEHS
TpTryp27	THAPSDRAFT_264293	1505	Chr.15: 358907-360411	403	5.62	44.4688	LPSLDENVTCCGFPMGGSQISVTRGVVSRIDVDSQHVLRIQIDAAINPGNSGGPVFDEHGDVVGVASAHLRAASNIGYIIPGKIVELFLNMSQEPKHVPGIPTLAILGSQNLESKALRRTLGLEDLDGGVRKSTDDTSKGDKLKANDVLLAIDGIPIGYDGTIQLSATRPDERINFRSLVTCQRVGSKVLLDVLRDKQRKELEVVLDTCQFLVPQYDGFDACPLYTVCGGCVFSPLTVPLISEKKSNKISSFSQYFRKQRTGNEQLLVLHKVLNDEVNVGYHGWRNMILKSVNGYTPKNIQELVDIIVRKVKGKTVEFHVQSMESEDADWIICMDTQEVLDAEQRILYRHMIASWTSTDAISRELRDAIEEGESSEAEKSVCYNTMCGMRKALGKKEKD…
TpTryp28	THAPSDRAFT_264337	1088	Chr.15: 810118-811205	331	4.67	35.1819	MASDVDGKKTTSSNVLFKVEGVGSGGKDFENGAPSGTPDKAPPAPSPNSSGSGNDIPQTLIKDSNWPYDGAIQSAVGRILFEFGGNGGTYVCSGTVVKDNTNGRTIILTAAHCAYNDALKKFATKAVFIPDQVSTKGEKSDFDCTNDRYGCWTLSFAVVSKGWASNAFPQNVQYDYAYYVVMDDKSNHSGGYGSGVSGTLDKDVVPMDLDFDVRPQNEFTVALGYSADRDPSFRYCTDDMSTIMGVPWYVNLWLDRCGMTGGASGGSWLIDMNQRGEGTVVSVNSWGFTDKPGMAGPDFRTSSGSFAECLFEKARSARDPGSVGGYIVDC
TpTryp29	THAPSDRAFT_264461	941	Chr.17: 432533-433473	229	4.45	24.6387	IIGGYEAPVGRFPYMISLQTNKGKHFCGGSLIAKNVVLSAAHCLNDNDDILAVIGRHGSTNVGDVVNVVDKKIHPSYNPWTDEYDFGLAILSRDTTENSPLLKLNSDDSFPSLPAKALTMGWGDMDPDDKGEEFPDKLQAVVLDVISNAQCACLYYSSWIFQDMICALTEDKDSCRGDSGGPFIFEGSSVDGDIATGIVSWGVGCAQIDSPGVYSRISFGFPWIKQVV
TpTryp30	THAPSDRAFT_19598	384	Chr.17: 542181-542564	129	5.91	14.0658	VLGYGRTSFPHGPTSHSLQKADVHYISNKQCNAKYLKAPPNTVSSKMHNEIITEMMMCAVDTEEKQDACSGDSGGPLLAQLPITTNNGNDERIWSQVGIVSWGLGCALQYPGVYSRVAHETDWIERTI
TpTryp31	THAPS_10986	834	Chr.18: 628561-629394	278	4.61	29.6738	MPTSAVSDSNWPYGGAIQSATGRILFQFEATGDSTFLCSGTVIKDYLSGRSIILTAAHCVYSDQHKQFASYAVFIPDQVSTRGTESDFDCYNDKYGCWLLSFGIVDEGWAEGSFPNNVDHDYAFYVVHDHASTHSGGYSQGLSGTLDNDVSPLELGFNTEWTPNELIVALGYSSEADPSLRYCSNGLSGIRAVGDYINLYLKDCGMANGASGGPWVVDMNENGVGTIVSLTSWKLTDSSGIAGPDLLSANGSKARCMFKKARRFGDPGVVGGYVVNC
TpTryp32	THAPS_42804	1756	Chr.18: 717019-718774	519	4.79	55.4086	MKLQTTFIASILASSSSITSFTYAQSIRGSSSTDKAVNTQRDLYPSKDSRIIGGSEASSGRYSYTVSIQDNLGHFCGGSLIAKDVVLTAAHCQGGPYKVVIGRHDLGESSGDVIDMKRELPHPKYNDRTTDNDFNLVFLDRPTTANVEMVTLNSQSSLPGVGDEVTVVGWGDTVAADDVQRLSDKLMEVEVNVISNQECDASEGEIGGWYDTYKNQITKNMLCANDKNQDSCQGDSGGPLVIKGNGASGEGDVQVGVVSWGIGCASQHFPGVYARVDTAYDWIREEVCKGSGYAPASFACSGSVQVDGSSGNNNNNNNNGSGSGSGSGNGKPDKPNKPNKPMAEGFVNNGSNINSSSSSSSIASSSNGNWNTLYTENFLNGFGIFRKGGSDAKHYIFLK…
TpTryp33	THAPSDRAFT_25685	3778	Chr.22: 82061-85838	798	4.78	87.3282	MVICWAQPSYRETTEHLFLLPIHGGRRGDTQQKEQMNSSNPTMNSNNASDNRRRRRRKASTTAATVVGAGVAVALLATSSGVVSAARALNLHGESLSLEGVVSVDHGAEDGFMGEHGSNDNGVGSDSNLQQRRELRQHVQRTLTAWQSSKSPIRPLDLVLEEPHHDANGDDSNNSGDDDTPRVYQVGSGGFLEPYDLNDYQADFPITLNFRGSNNNYAGDATEKVEGGDNAGATMGGVTHVTSDRLGLTNFDLKRLVRDETDGYVENGRQLRGLHNGEGVEVGGAGGIDIIDKEELRRSIFVYSQHNDPEEVYAQQVNAIHDDRDLEYYDLSSYHRRGDAKYHASNVQDVTDTTQTTEESTAEQQSYAATWFKKSSSSTTTKDTTPPVIRATFPPPSTK…
TpTryp34	THAPSDRAFT_264608	820	DS999419: 584300-585119	188	5.08	19.6302	GSGSGFVVDADGYIVTNYHVIQRAYETNQMVINYSNASYYACEIVDVVKELDIAVLRMQSPMNGSERMPLKALSYGSSSNLLVGQTLLAIGNPFGLDRTITSGLVSALGRTVTGVAGNPINNCIQTDASINPGNSGGPLLNLKGEVIGVNTMIISTSGSSAGIGFAVPGDNVKQKSNEIVDLDKERR
TpTryp35	THAPSDRAFT_14899	1246	DS999420: 121302-122547	326	5.77	34.2399	ASSSYSASRPSDLLSQDENRVINTFARSSPSVAHIQTVSQQQRIQRSGFSLKGTEVPTGAGSGFLWDDKGHIVTNYHVIAPAMNKGHLIKVKLQGMPALTATIVGVEPEKDLAVLKISARNLPMPIDIGCSHDLMVGQNVLAIGNPFGLDYTLTSGIVSALGRDVDGIGGRPIKGCIQSDAAINPGNSGGPLLDSRGRLIGVNMAIYSLSGSSSGIGFSIPVDTVRRVVNQLIRYGKVVRPTLGVNVAADQINKELNGVLIVDVVDGSPAEAAGLKATVLRSDGTVDLGDLITEIDGDRVVSVEDLLSSIETRAENDVVDVRIWR
TpTryp36	THAPSDRAFT_264656	822	DS999421: 261259-262080	237	5.35	25.5368	RIIGGRVTNERRYPYAVALTKGGDRFFCGGSLIARDVVLTARHCLGGSYNVAIGRHNLTSSNTAGDEVPILEEIGHPLWDKYTDVYDFALVILSRPTTIPGIPLVKINSDSSLPQVGSSARTMGWGDTAQDDDLRRISDVLMAVDVEVISNNECRNAKGTEGNLYNSYKDYIYPSMLCTHTPGKDACQGDSGGPLVIPGTKATEDVQIGVVSWGIGCATQLFPGVYSRVSTVYDWI
ToTryp1	THAOC_00403	1446	Scaff_g00462: 4367-5812	454	5.13	49.6339	MNQRSTTLIIVLSTLAAVATGKTIRGGDHHRELQRNRIIGGSEAQEDRYSFAVSLQDRIGHFCGGTLISPDTVLSAAHCGGGGYDIVVGRHDHGDRDGEVMSVKKERKHPSYESDTTHNDFMLIFLDKPVSVNNVKFASVTDNFVRANEAVTVVGWGDTDIDLDEEELPDELQEVEVYTIGNKECDDSEGIIDGERDNYNGQITSSMLCAEHPKRKDSCQGDSGGPLVKKSGSGSGEEFELVGVVSWGVGCAHDDFPGVYARVSAEYRWIKEEVCKRSSRPPASFGCGGDSADKVDDSASTTNTIPSGSWRTVMNEDFIGGFGKFSIGGLGSKHYPSAKGKRGVALVENRSTLSSNVMSLNSGESRIRVDLSAQFLNFENNDEFCLDSLDWSSGDLKYK…
ToTryp2	THAOC_01251	2427	Scaff_g01537: 1112-3538	622	5.19	67.4557	MGLMCTARDPAVIVKGHTAHRPHPKPRPHRVPIGQDGQCTPRTKGKSSDGGSESGRQRSVQNTKFDLSQRDQAPSFAAMGSLVLSLFMAQAVTATATLRGSQPPPGDRSLQLTPGGSLRIINGDDAPEDKYSFAVSLADSIGHFCGGSMIAPDTVLSAAHCAGGRYEVIVGRHHVNDRDGDVIGVKKELKHPNYRASTTNNDYMLLFLDRAIDADKVDVTYVTVSDRFVGKNEPATVVGWGDTHISDKVQELAKELQEVEVYTMDNDDCDDSEGEIGGFKDNYHGQITDSMLCARHPQEKDACQGDSGGPLVIVNGDSFEQVGVVSWGVGCAHDDFPGVYARISHEYEWIKEEVCNRSKFKPSYLCGSGVNINTGGGSSSNASTSSVATPDPTREPTRP…
ToTryp3	THAOC_01353	658	Scaff_g01626: 7351-8008	193	5.28	21.1454	MNQRSTTLIIVLSTLAAVATGKTIRGGEHHRELQRNRIIGGSEAQEDRYSFAVSLQDRIGHFCGGTLISPDTVLSAAHCGGGGYDIIVGRHDHGDRDGEAMGVKKELKHPDYESDTTNNDFMLIFLDEPVSVDNVRFASVTDNFVGVNEAVTVVGWGDMDIDLDEEELADELPGGRGLHHQQQRVRRQRGRH
ToTryp4	THAOC_02278	2808	Scaff_g02657: 224-3031	685	6.13	74.201	RKSITSGTIDSEEHASAERSSRRTQSRFRTSAPASVLRYFGVECRDRNLLAAMYPKQAMTMFLLSVVASARREDDAYRIKDASSSSRIIGGQRVRGVWLLRREIGFGRVSHLAPPLAKTEEDRFPYVVSLNDFSHFCAGSLIANDFVLTAAHCLGGSYSVRIGTDRSSNRGVNVEMLREYEHPDYNDRNDDNDIALVKLSEPAGRGMPLVRMNPNEDVPFVGTWAHVMGWGDQNPDEDITRLAKNLMGVDIQVISNSQCERSSRGEDSYRGWIYDSMLCTMTQGQDACQGDSGGPLIIKGDSPEEDVQIGVVSWGIGCAYLPGVFSRTSSAYDWIRTVVCEDSAEPPMSLCDTERMPSTAPSSSSSPSGMPSLSTEPSMAPTGGPSSEPSGSPSVAPSV…
ToTryp5	THAOC_02617	2895	Scaff_g02848: 2130-5024	769	5.34	83.512	MSSSLGRGHREINHHGPATGRFNAPAQEEMDERNRVAPGTSGLSRRRRRRPERQRALLMAASLMSGCCASNSERRSLSGVEFLELDSKQHGAEGRHVNIESIRALYQNGNNGPQLSHGVGVRDHKRRRKGQRALAERHRGRELIVGGASTPPGRFPYVVSLQLEKVLDGSQAESNGGADVSDTHTCGGTLIAMDVVLTAGHCGYEELPSLQSTSSQSGSVSVEGAVNFGKMPQQVFYGADVGAYDLETNDGGDYTGFHGRGSAQISLQHDIMLVKLYGASDQPVVRIHNPASSKRKELNKVPQEGEEMVVIGWGDTDPRSGEENSKLATKLQAASVLYLPNDKCESSKGYSDITESSTVQTTGQYFEYDGTISDDMMCAVGKTKDDPNESSGDACQGDS…
ToTryp6	THAOC_03569	1619	Scaff_g03446: 818-2436	463	4.74	50.4097	MMNKAALVCLQLIFASSSAWKVLRGSHRESRIIGGTESDPDHTYVASLQDDIGHFCGGSLIAPDVVLSAAHCGTDIPKVILGRHDLGKSSGGEVMTVKEAIKNPRYSTKNDNNDSMLIFLDRASSMKHTELVRLGRDFVGEGQHVTVRGWGDTNPSDYRENYPNELMEVEVKTLSNEDCEASKGRDFDYDGWITGNMICAEHRLRKDACQGDSGGPLVVESGPEPVQVGIVSWGYGCAEDDYPGVYTRVSTQYKWIREQVCSRSSSPPDYFNCNTASTLQQSQASGNGEGIEEDANEEASIVVEEEPAGPAMFEKGSFRVEEFDNGDFGMFTEHSESARHYAESHLQQGVVAVGDGLSIGTEYLSLGGFNSLAVSYRFLAENLHPGDEFCLEYILDEGE…
ToTryp7	THAOC_03571	1348	Scaff_g03448: 480-1827	400	4.64	43.6731	DVVLSAAHCGTDIPKVILGRHDLGKSSGGEVMTVKEAIKNPRYSTKNDNNDSMLIFLDRASSMKQTELVRLGRDFVGEGQHVTVRGWGDTNPSDYRENYPNELMEVEVKTLSNEDCEASKGRDFDYDGWITGNMICAEHRLRKDACQGDSGGPLVVESGPEPVQVGIVSWGYGCAEDDYPGVYTRVSTQYKWIREQVCSRSSSPPDYFNCNTASTLQQSQASGNGEGIEEDANEEASIVVEEEPAGPAMFEKGSFRVEEFDNGDFGMFTEHSESARHYAESHLQQGVVAVGDGLSIGTEYLSLGGFNSLAVSYRFLAEKLHPGDEFCLEYILDEGESSSECTSRQGPFANGVWYIKTAKLDISNASSVKLKFVLRAKSSSGGQEDSDVLLDKVIFRGSS
ToTryp8	THAOC_05915	1465	Scaff_g05722: 1133-2597	231	5.5	25.2263	MGDANCGASVISPRAILTAAHCFINDGMYDANRFDYIEVNRYDLTVDNGAGGKPVERRYFDRVFQDSETTVGKAQVHIHPCYDGSSANSNQEFIDNQENDFALVILKDPLPDYITPVKLNSDNSVPTPGANVQTMGWGRTEVVPYPDRPVTRVALLFTTMALRTSKLVLSAGPLGLAKIYHLAPLFQGYDWIVSTACHYTNDEASFCKSSKSSKSAKKSAPSWENCSGDL
ToTryp9	THAOC_06831	266	Scaff_g06956: 339-604	88	4.63	9.222	RGLVGVVSWGVGCAHDDFPGVYTPVSAEYRWIKEEVCKRSSHPPASLGCGGGSTAQTSNPQQNDLFEADDSEPNQSTAYLFISNSSG
ToTryp10	THAOC_08254	2126	Scaff_g08682: 69-2194	515	7.94	55.1583	TAVGEPDLQVGVVSWGVGCAHDAFPGWVYARVSEKYEWIRAEVCNRSADPPAYFNCGELRTQETSPSESAWEEIVDEEFLTGLGIFNSHGNGDSSRHYPTAQNRAGVVRVASGGGTASLASRSISLADTSYGRLRVSFSFYAMGTEHADDLCLDYELDNGAITGERCWSSLHAFQNNQWTDLDMEFNASPGARNISLSHSASSSYHFHDLAVLEGHSGRAAPRAFKMWYPCGRTPTITKKHAEQSQASTVPTVDGRLVDCSPPEASPFCIDTGPYSTTSPVRSSGVGLPPEVDRGSSCTATSVSAKRGSQIVLRRARACRTRSKHVGPRSASVGPYSATVASIETEPATPIRRSRPSDGSAAISLPTANRSITWCAVQSSSSEGPPPPAGAPRGPPPGP…
ToTryp11	THAOC_09030	1920	Scaff_g09806: 1444-3363	641	7.22	68.218	MMDAAAAPEDVPEDGPVPPAISPAFEHANQPRSGKPPQRLEKATTTNGVRARTDSSGGDTGDFAAGALLALASAPQGDPNHRPSLKRDLASVTAVSSTGGNAAAPVLEPPALRQRVLYSDINSEPSAAAGTVYGKFADQLLWGYASCPTQVPVSLVDAHKAAFARASQDSQVRGLHYQPDSPNLADCAVVQLSVVTCKPCYTEPWRKLAPESSSACGVVIPWGSPSDGQNGADARRDIRILTNAKLVRYATSIKALLTEARRDIDYSSSYSCTVEFMSPEMDLALLEINAEDIAVTKLFPAVLHPSPSLANVGDRVKYMSQRSNSNGYGRRDTFVPSSLYEGDCAGTSSSTTVNITGSVGCYWTENNHNLLRMQVLLPSSQDNSLPGGAVVSSVGGLVG…
ToTryp12	THAOC_09706	1135	Scaff_g10566: 2545-3679	352	4.31	38.5567	MNPLSTLIVLLSTLAAVATGKTIRGGEHHRELQRNRVIGGSEAQEDRYSFAVSLQDRMGHFCGGTLISPDTVLSAAHCGDDDYNVVVGRHDHGDRDGEVVSVKKVLKHPSYKSSTTDNDYMLIFLDKPVSVNNVKFASVTDNFVRANEAVTVVGWGDMDIDLDEEELPDELREVEVYTISNNECDDSEGVIDGERDSYNGQITSSMLCAEHPKRKDACQGDSGGPLVKKSGSGSGEEFELVGVVSWGVGCAHDDFPGVYARVSAEYSWIKEEVCKRSSQPPASFRCGGGSANQSANAPQNNLFGGDDLESRQDDTVGQDGDDDDYHYTDDDDDDDNYYHWIDDDDDNYYYI
ToTryp13	THAOC_09756	1413	Scaff_g10659: 3182-4594	471	4.46	51.1924	MFGRYLTKAFVAQLALTVAASATDGAHSFLRRGAPAHMVQREAIASRNRIIGGDKAAEGRYPYAVSIQDDISHYCGGSLIAPDIVLSAAHCNTGDATDGVKVVVGRHNLDDEVDGEVIGASLELSHPDYDPQTTDNDYMIVVLERAVEADVDQVQISPDVVPVDSAVTVMGWGDTNIDLDIAELAIELMETDVHTISNEECDASNGTLTDSLGSYDENYHQQITRNMLCAENEHEATDSCQGDSGGPLVIRTALGEPDLQVGVVSWGVGCAHDAFPGVYARVSEKYEWIRAEVCNRSADPPAYFNCGELQTQETSPSESAWEEIVDEEFITGLGIFNSHGNGDSSRHYPAAQNRAGVVRISSNGRTGSLASNFISLTNTSYDKLRVSFSFFAIGMEHAD…
ToTryp14	THAOC_10559	407	Scaff_g11734: 1-407	136	4.44	14.9736	MRSRGLIINGVSAPEDRYPYSASLQYNSEHFCGGSLVAPDFVVTAAHCTSSPSKITLGRYDLDDLSDYDFEVMDVVEAFVHPGYNKETVDNDIALLMLERQSIHPYVKLNADSDVPTKSDDLRVKGWGDIDPSDN
ToTryp15	THAOC_11564	1939	Scaff_g13303: 864-2802	584	7.66	62.7701	TMASSKCLLLIVLLALTAANAQRLRGSESTGQTTRGLQLEGEDSADPHRLKSHDHITRVRTRPKTQKRAAKLTNKQKKARNQAKAIDSSITDSISGRTQAEHVRTQKNEEDAYLVGGKHADKMAPRIINGSEAPKGKYSFVVSLQDNIGHFCGGSLIARDYVLSAAHCNGGRYDVVVGRHDLDKRDGQSIGVDKEIMHPKYNSRTTDNDYMLLRLRSPADNQYDLITPNSSGSKPSVGSSVDVMGWGDIDIRDNVNTLSDVLMTVDVKVMSNRECDDSEGYIDGSKDDYNGQITNNMLCANDVANREDSCQGDSGGPLTQGDSLVGVVSWGVGCATKDFPGVYARVSSAYDWIEDEVCRNSKYKPGWCGGSSSSANAPSEDGPSTGAIISGDSDPGGSG…
ToTryp16	THAOC_11802	1938	Scaff_g13665: 1836-3773	543	4.69	60.009	MRSRGLIINGVSAPEDRYPYSASLQYNSEHFCGGSLVAPDFVVTAAHCTSSPSKITLGRYDLDDLSDYDFEVMDVVEAFVHPGYNKETVDNDIALLMLERQSIHPYVKLNADSDVPTKSDDLRVKGWGDIDPSDNGQLTSDELRETTVTYIPNEICEQSEGYVVTSDSGGGLIKRGKTAAFDTLIGIVSWGYGCADPNFPGVYSRISEHFETFLKPTICANSRSPPPYLKCFTNNVASTLKPTTAPVPVPDGLLTIEIQTDPYHPEDLGWELLSVPANDLIQSRPIGFYTNRFGVSVSEEVVVQPERFYRLTIHDKLRNGFKGRVTVFAGRRHVLSDALVYEPGFSSISGASVTHGFFVGDSPPRELTLYLSFDNKPEEVAWSIESVADDLLPLGFKWF…
ToTryp17	THAOC_12550	2187	Scaff_g14966: 567-2753	460	4.46	48.9195	MKRSFLLPLLLIAVGSTEGSPSEQRRGDDRRRLHSLRRDLRKGPEAAEAEDEFESFLDSIGVEASLSMDMSDSIIGSRPDSIVGGEQISESDFVNHFRYLSHLGYSSEDSSVSFCTSMVISPKAILTAAHCLYGFGEEFEGVVFVEVNRYDLRTSLSNGAGGDPVTRVYFSYTGPKPGLGGYAVLDPNYDDKTLNRDFAVILLDDALPVELNSENSFPKAGADAQALGFGLVQGVGEIVPDIPCKMGFDPPICGHCDICYAGITEASICAISQNGDKDACQGDSGGPLISDGLAVGVVSWGAICGAPLEEPGVYARVSEGYEFIVDTVCAHTDYTDSFCPPKPGSKSGKSVKKNSDFTDVGVGFCTDSEGQFYNGVVYERISTLEDCQELARDLDSDFP…
ToTryp18	THAOC_13238	2118	Scaff_g15553: 9680-11797	635	4.27	68.4265	MKSTSLLLSSVLALSSSKAASTIRGADQRELLSDKPHRIFTKRWTVQQPTERDVTNVVDEVQPKQLDKDLRIIGGQESTKGRFSYAVSLEDRVGHFCGGSLIGPDVVLTAAHCVGGGSSSFSVVVGRHDLNPGWSGWFSTSEGQSLATKDVIKHPDYSTTTTNNDFAIIVLSSATTEDVEFVNLNPSSSTPQSGDSVTVMGWGDTNPSDAVVASDKLRDVEVKVMANSDCEKSSGWVGGFYDSYAGDISAQMLCARDPNEDSCQGDSGGPLVIKGSHPEGRDDIQVGVVSWGVGCASSSFPGVYARVSSAYEWIRSTVCENSSAPPESFNCGEPGEESDSTPDQSEDSQSASSTGEDSGVSSNADDEYCQQLNLELYTDAHATETSWKLEKIEDGSLFT…
ToTryp19	THAOC_13405	2020	Scaff_g15691: 1342-3361	601	4.91	64.1011	PVVVPRRLPTGRGGVLLPYGPSEDGEAVPGNGYEEEDGGEGAPEVIHLTVRGAVDAGSDVGGKDEDEGGGSRSPGGHYWSERVGYTNFDLARGVGLDVDEYDEDFASEEVERRAARRAEARGLRGEEWDGAGVTPLFVYGEHDDPHESAELIPEFNGGDDGAGRRLQYAGHSKSSQADSFASPSDLRPNGTKKDSVNKDSEADAGEDKSEPVIVSAFPPVNTKIGDRQSFGALVRDVGGSGVRSACVQLQDHVRARSPCLKLKHVGEGGGGPGCGGDGDDRGDGGGGEGRGGRDGRARHDGADRTRQALRDRRGRELAARSPVPRRTGVVQTSTGRVLFFYDGAQFVCSATVLKQPARDRTILLTAGHCAYQHSPGGRGRFADYALFVPNQVDTRGTKS…
ToTryp20	THAOC_13435	534	Scaff_g15720: 689-1222	179	8.4	19.1485	MTSRRRRRRLLCLTSAAAATLCLSSVDASLHKRNTGVLTSSAEALDRRFASQSSNLRRRRSDEFDPLGGTRLSAAVLGGLQSPPSRELVEAGDHTKIIGGSVVEDGKYSYIASINYFTSHFCGGSLVAPDIVLTAAHCAGYATQIELGRYDKGVAMSGDAERIEVAFEIVHPSYDPNN
ToTryp21	THAOC_13494	2148	Scaff_g15772: 633-2780	526	6.76	58.2423	MTRGQADYRLITAVMSNARPIGSTWSIQPACRRCSGVAVLPLLGTLLDSPSSTSTSQFVIVPPARPLKNEHGREQCRDDFWCSRSNNMPSRRCLATLIGRGRSRAARRPCSAAAQLAQSAQPTGRDRRARRFRRGRGTVHGRARRSEHEHADAGRRWGACFVGVLSAPHQNDTTPPSKIPSDISFHYQEPDEIFYGSEMTEEEFVENYRYLVNIGNKDSPQCGASVISPRALLSAAHCFIDYTDGSYDAYIIDFIEVNRYDVSVDNGAGGKPVERRYLDRVFQDSETTVGKARVRSGFSFQDYIDRTGNDFALVILEDPLPDYITPVKLNSDDSVPTPGVDLQTMGWGLTEEDTYPDRPRIVTIPAISNEQCEELTFGDVYIPDNMVCTFDDEGPPERD…
ToTryp22	THAOC_14041	3132	Scaff_g16465: 2372-5503	966	4.78	104.555	MKLSPFQNRFLAATLVFIARGTSAIVTKETPQQAITSLDSAKFFVSLFDRGDCAGVVIGDNYVVTAAHCVCGLEDEVKVIDYLNDEYYAVATYTNPNRPFNCNRDGPNSNDVAVVEFTGRPFRNHDARPVYSSSDEVGKTIWILGMGIHGQPDDFPNARACRNGAQDSNLREGYNTVDQADGILTYTMKPSSSSSSHPREAIAQDGDSGGPALINVNGEWQLAGVNSGTDENNSCDWGSVDQYCRLSEHAGWISQTMGDAVDDGDGGNDGDGGNDDQHEVILGSGNGCPDGRVKVTCRDGCEQAMNVAPANVKNADFAGTETEKNWPSGCYFCDNVDNCWDGVWFNRHETGRANGGAAPLCVLPTADYCSDDSDDGVDTLFAGDSDIDYWPDGMRAEAF…
ToTryp23	THAOC_14214	4416	Scaff_g16746: 272-4687	1078	8.48	116.604	MSDDESDPPEDNPTDLMASAADELPPSAASVAALARAAKRPKVSSSSSRPRRSSSGRTRPVVKLLVTSFGHRLPNPVAPSKPSDGIRIVTNAHVVRNASTVRARASFGPHVVSCEVEWLSLPLDLALLKIAGGDWHEFCRGWNFPELDPKVVGEDGKGKREDDGNSKAEDGMAAMNIDSEDGAKDGKLAEMEKLAEGGDGKDAGGGGRPEEAGGGGSTKRPDSSTGSKCLTFSAGLPRLDENVTCVGFPQGGSQISVTRGVVSRIDVDSNYVLRIQIDAAINPGNSGGPVFDEKGQVVGIASAHLRGASNVGYIIPSKIVEMFLGMCRDGIEVGVEDRFSGLGTLVVLDEQTEESNEPRHVPGISNLGIHGSQNLESKALRRSLGLEELDLSGGVRIVG…
ToTryp24	THAOC_14379	188	Scaff_g16941: 16-203	63	6.23	6.66259	MMNKAALVCLQLIFASSSAWKVLRGSHRESRIIGGTESDPDHTYVASLQDDIGHFCGGSLIA
ToTryp25	THAOC_14473	1732	Scaff_g17058: 438-2169	549	4.91	59.5974	SKTENNSTAVGKQDRKNSPAKQEEGNLQEALSPGKPRAAKPKRTRTLVHRMRSAESTHKSNLRSTAHLSISEQESPKVKMNQRSTTLIVLSTLAAVANGKTIRGGEHRRELQRNRIIGGSEAQEDRYSFAVSLQDRIGHFCGGTLISPDTVLSAAHCGGGGYDIVVGRHDHGDRDGEAIGVKKELKHPDYESDTTNNDFMLIFLDEPVSVDNVKFASVTDNFVGVSEAVTVVGWGDTDIDLDEEELADELQEVEVYTISNNECDDSEGVIDGDRENYNGQITSSMLCAEHPKRKDSCQGDSGGPLVKKSGSGSGEEFELVGVVSWGVGCAHDDFPGVYARVSAEYRWIKEEVCKRSSRPPASLGCGGGSTAQTANQPQNDLFEADYSEPEPSTASMIIS…
ToTryp26	THAOC_14498	2539	Scaff_g17094: 60-2598	716	6.95	78.16	SLERAASLRKTFDRPRKVSVVRIWTAMGRRTIAVLSTALSLSLSLAFHSVSRTCQQPPSTLLVDNDRFWPGRDIEVDGEAEDDSAHKAALDSVVKIFASHSEPDYLLPWQRQQQSTSTSSGFIVEVPGGIRVITNAHSVEYTSVVQVQLRGDDEKYAATVEAVSNEADLAILRVDLFDKGTLDLYPLPIGRIPSLQESVEVIGYPAGGDSLSITKGVVSRIEMQEYTQAGEILLALQIDAAINPGNSGGPVVNERLEVIGVAFQGLDEAENVGYVVPSSVLLHFMEDVRRGKNPRFCKLGCDVQFLESSSFRKLLKMKQGQTNEDPKKQKQTGVMVRRVYPLSAAVGKLKKLRLSRQLKCSESGIPVGNDGKIPFRRGERVALGGYVSSLFAGDIITLT…
ToTryp27	THAOC_14538	1526	Scaff_g17129: 264-1789	476	4.67	49.5569	MSASSEFVPLSAIYGPGGTAAADPPGPTMDRSPPLTNAGPPLPPPVIDTRARAVADDVAPPRSPLSSPQSTVKTARVVRPSVALVTSKGVRKESSQGSGFVVAFDDAVAEAAEGDEDVDRCHVLTSAHVAPPGWKVSVTFPSDPEREYPATVVGRKLMSDLALLSVECPADDGEDYPFPPPLILSADNVSSGPAPEDDGESSSEIGSPVYSFGYPMGVEGPSITSGILSATTRGINYMDAPTGEEPGEVAKTRPFENTSFLITDAAMAGGMSGGPLVNADGIVLAINALVRPDLRALGHYAVSAVECETFLERLEEQRAKDAASKGDDAPSSSTATTARRQRTTSRRVASSPSAGNSDDEEGAEQSPPGGEDDGTGVAGYRVMLYGYSTSKSDATKALR…
ToTryp28	THAOC_14697	2726	Scaff_g17288: 1-2726	676	5.28	73.0647	MRAAARLLAVTSVVAKLHVPAGAITDSDRGPDEATTEGLGPWNRVASGPESSSTESSDLAMGDAVSRVRSSEARRGTAKGVAASRWTNFGEAEADCVALGKQIVSPWILSEQAPSQAASGQAAPCLAPPGRHYLSVALRTLGAHGKKQLRQLAMISSTQAAAALLYSAFVILYTRIAALEGGDGRKPKRERVHRVPIVAVGGDGYESTDASGLLVEVATTLAGNDSHLSKHQLTKIINGIDLDREEHPFIARLHWEDPGLAADENSSFFYCGGSLIAPDVVLTAAHCITEGIYVDIYSLEEKKTMTYAIIQTIVHPNYRTDQYGHDMALLKLSKPHVELSTGTDGQYILSSAELNYDWTESPPMIRLHRYSLDSNSYATCPDMDTNEAGEVTTLTVIGF…
ToTryp29	THAOC_15135	2052	Scaff_g17742: 1217-3268	542	8.38	59.2798	MMLRTTLVVALSTAASVSGARMVRGSASTAPDDEPRRLDDRSLRGERHGPYRMFHGGVDPGIHDDDVPGEDAGEDEYDPAVWGEYDGAGVDELSPEDGSRIIGGYSAGTTRFKYIVSMKDRIGHFCGGSLIAPDVVLTAAHCQGGSYDVYVNHPKLNTNSGQKMSKKKELPHPNYDSRGTNNDFMLVFLNSEVNMNQASLVRLNSNSNFPVNNAQVTVMGFGDTDPRDSVSKLSNELNRVEVNIISNSDCEDSEGRIDGAYDNYFNQITSSMICARRNSRDACQGDSGGPLVRLGNMADGSGDTQVGIVSWGVGCADPNFPGVYARVSSAFNWISKEVCNRSISRNIPSYFGCDPPPPASSPSNQQQQQQNNQITASSSNTNTQPITASVSAGTWTTLV…
ToTryp30	THAOC_15835	3130	Scaff_g18372: 1648-4777	565	4.75	59.0949	MLLTAAHCVRAGSYSARIGGDRVNGGSSISIAAGYKHPSYSSFGSGSEWDMAVLRLASPVTIFTGGLINLFSNGGHIPLATVNADDGFPRAGDRAVTLGWGDTDPDANGQVLAYNLQEATLEVISNERCEGARMGQYSYEGLVDESMLCTYTEGRDACQVRKERASERRGRQTLEGADNLSTLKNNQQLMQCEFISQGDSGDYLVIGCLRPGLPSIGMDTKYRLRQFRSAAADAVYAAADTASDETPHEEPDEPTNVSDDCNQWSVVVEMTFLRHLIRPNPTAEPSKPPTNRPSASPTESPTDAPTESPSVSPTISPSYSPTDSPTESPTESPTPSISTRPSANPSSGPSAQPSVSGAPSSMPSTVPTISNAPTLSFGPSSQPSTSPSNSLMPTSQPSD…
ToTryp31	THAOC_18267	3653	Scaff_g20382: 448-4100	906	4.61	97.5796	MRDLFSASPMGDVFMPKLEPLCTYAARRTTANFVRFNGAATVIQYGDDGSRRTYLSSRDGAKQAVSLRRPSKAAQSVERLPLAQLQRCLVSLAFCRGGWKGTIVRDESLITFRPLRTRYTDTSGRAASRKLDFDPEESIDERLAGGRDMVTVIAKKLSRTIDESAGGRGDWKKLTVIVLGSSELAFDWKNFASIHPEVVCPKPSPGVPGVGPPSEKAAIMEPSGAAAARRRGGSRHPRRALHTLLPLLLIPAAPASVLRPSDSTRIIGGTEDAARRYPYAVSLHYAGEAFCAGALIAPDVVLSAGHCNGQSLKEGLSYNVMVGRHDLDLYWTGESIRLREEFRHPEYNEENVDNDFNVVVLSESASDSVPIIRLNDDPFIPYAPPSGRGDGDELTVMGW…
ToTryp32	THAOC_20152	2922	Scaff_g22990: 1123-4044	574	9.8	62.1172	MGGCGPRKRLSSSSHGRPNLAPMVRPGTASSCSIVIHRSVDPLLLRHPSFEGNGRKIARNARARPALHGSPSSPGPARRATRPPSPPRADDGPGRGSSRPLLGRTSSEGRGRERVPSSPGGPRRPRPGGPTTRRSGRGAGAAAPAGVFPRSRGQGLGPRGRSRRRSFALRTRARPGWDGAVRVVANGDRAVRHGDTSWTRGQADYRPITAVMSNARPMGALWSIQPACRRCSGVAVLPLLGTCLIRRPPLPLPNSSWSPPPGPSRTNTAESSAEMIFGALVLTICLRVVASQRSSAADGLAPLAGRARRQRNWRNLRSLQGVIEEPAAFEEDEVPFMDELADLSMSMLMLVDDGEPDEIFYGSEMKEEEFVENYRYLVNMGYEASHCFITNGSYDAYII…
ToTryp33	THAOC_22204	2392	Scaff_g27729: 13939-16330	595	10.04	64.6362	MFKFTPANRRRTLDGRELLGQMQRIVSFDGGGSLRIRVKARQAKNSSRGLTKVNRQGIATKVRKGKGYLGNLRVKMLGLAMKVIPIIAAVSAFCPSPSLPGSFVVANTAGRRQRSNRPSRLSSLYGHVFGRGQIPEIDDVYQLSGGSGSDECLRRVSDAVRGGDYSRELEKLSRLSVTELKSLLDQNDIDYRDCLEKRDLVDRLVENKDRTGYYGEKNDSGLSHEENRVVNTFKRASPSVAFISVGQVQTVQRGFSTSQQDVPTGSGSGFLIKVKLQGMPPLPATIVGYEPEKDIAVLRVSSRRLPEPIHVGASSNLQVGQSVLAVGCPFGLDYTLTKGIVSALGREVKGVGGRPIKGEQLRTFNLLRKAAIKNQLFRKRLHSKVTNSFDFFFLPSSLN…
ToTryp34	THAOC_22283	1420	Scaff_g28028: 788-2207	473	4.5	51.0779	RNHDGLPFESTPPCAAATAAETRSLRGRPQHHHHQSAPTVQREAIPSRNRIIGGDVSVEGRYPYAVSIQDDISHYCGGSLVAPDIVLSAAHCKTDDATEGVKVVVGRHNLEDEGDGEVIGASLELSHPDYDFQTTDNDYMIVVLERAVEADVDLVQISPDVVPVDAAVTVMGWGDTNIDLDISELAIELMETEVRTISNEECDASNGTLTDSLGSYDENYHQQITGNMLCAENEHRATDSCQGDSGGPLVIRTAVGEPDLQVGVVSWGVGCAHDAFPGVYARVSEKYEWIRAEVCNRSADPPAYFNCGELRTQETSPSASAWEEIVDEEFLTGLGIFNSHGNGDSSRHYPAAHNRAGVVRVASGGGTASLASRSVSLADTSYGRLRVSFSFYAMGTEHA…
ToTryp35	THAOC_25591	2581	Scaff_g35899: 188-2768	722	4.39	78.5322	MTTAAPAPAGDDRGHRGEEATAKTRTDIILADRHSGNDRREKEKGAWTTAWTRGSLGARVARARTMAAAAMPVVANARSVASILTSTDGFHLSRAGMELHSPLNYKSLEHEFRRQRRLKVKDDTATSRNVQAMNDLHASQRRDEDAIFSEEEFCTPAGASSLESNLQNEVYADRDVDVMCGCLDGFAECSVTFNEEECEVLSCSDGRWNCLDPDASSVSVCTIERIITTWLLLDDIAPSLFLIQSTTEYTSGVANIHKTSALISVIEEEEPECLMFNVDRSQKKVTSKMLCAKEDGKDSCQGDSGGPLLIKGADSSQDLQIGVVSWGVGCGEDGAYPSVYARVSSAYDWIRAQVCKGSVDPPASFECDESAADDTVRSGHAKQERIVGGEDAKVGRFQY…
ToTryp36	THAOC_25819	1189	Scaff_g36237: 6852-8040	369	8.79	40.6418	MSKSNAIQLLLVAAVITLAAATNYVRGGLDADARKSRQLNLFKEDRIIGGSRAEKDRYPYTVSMQDGSHFCGGSLISRDCESARCKARRSQHRTERLSRHRRHSLSHLSNPIMTVVLTAAHCLGGSYDVRIGSDSVGSGERIEMQREYEHPNYSTRTDEFDIALIKLDRPTNLDVPLIRINDNNNVPATRTTVTVMGWGDTNPSDSRQEMAKNLMEVNLDVISNSQCEKSKKNNDSYNGFIYQSMLCTQTRNKDACQGDSGGPLVIKGNTPEEDIQVGVVSWGIGCAYLPGVFSRVSRAHGWIKKTVCAQSRDPPAELCDLVVETPRPTPRPTPNPTRLPTRPPTASPTEEPTVRTQCSSNTFCSKIS
ToTryp37	THAOC_26174	909	Scaff_g36732: 2266-3174	303	4.4	32.8528	MGWGDTNIDLDISELAIELMETEVRTISNEECDASNGTLTDSLGSYDENYHQQITGNMLCAENEHRATDSCQGDSGGPLVIRTAVGDPDLQVGVVSWGVGCAHDAFPGVYARVSEKYEWIRTEVCNRSADPPAYFNCGELRTQETSQSASAWEEIVDEEFLTGLGIFNSHGNGDSSRHYPAAHNRAGVVRVASGGGTASLASRSVSLADTSYAKLRVSLSFYAMGTEHADDLCLDYELDNGAITGERCWSSLHAFQNNQWTDLDMEFNASPGARNISLRFRLKGDDSDDGVLIDRVTIEGRV
ToTryp38	THAOC_28496	417	Scaff_g40761: 1-417	111	7.06	11.8383	MNQRSTTLIVFLSTLAAVATGKTIRGGEHHRELQRNRIIGGSEAQEDRYSFAVSLQDRIGHFCGGTLISPDTVLSAAHCGGGGYDIVVGRHDHGDRDGEAMGVKKELKHP
ToTryp39	THAOC_28538	2360	Scaff_g40818: 1299-3658	711	5.68	76.1237	MLQAVHSGGICPSARCSTTAFVTTVARPSRSIRQSVVFATPGGDVNAVSDEDGMGMDSGWTTFGRVLLPSWASIKQKQEEGSSLDGGAMLSNSTNDTSFDVTDEKSNAFDVAIGSLDDNNSTSIGSELGGDINETRVEDLADGPDSMDSGNLTSPIEVAPRSLDKPSRIPRVISTVVKYIQGRGRRVAKSAAIADEFQVVSEDTDEVVISEHREDSKPILSSFESSDIDKTTLSKKMKWARRRTRLHVLFNALRSAAFLFVLTLLAGNVLNQVVDLDDEGSFEVHYGKALSSKAPKSLPKSSPLEQDSPKKSPSPSSKKKLEPQATNVHTQPHNTYAVRGSQPLRLVASAVKRNGPAIVRVETETDLDSKIAIDEEADDKGSRGDVFDGIPDVPSVPSQ…
ToTryp40	THAOC_29265	635	Scaff_g42043: 1-635	185	4.45	20.1552	MNQRSTTLIIVLSTLAAVTTGKTIRGGEHHRELQRNRIIGGSEAQEDRYSFAVSLQDRIGHFCGGTLISPDTVLSAAHCGGGGYDIIVGRHDHGDRDGEAMGVKKELKHPDYESDTTNNDFMLIFLDEPVSVDNVKFASVTDNFVGVNEAVTVVGWGDMDIDLDEEELADELQEVEVYTISNNE
ToTryp41	THAOC_31183	1646	Scaff_g44965: 2898-4543	482	5.22	51.4418	MRQGQIHKCYLSVVIVAVVVVDGFRSNTLSPATTVEIFDDESASSSGAEESRRRALQRVAGMVPALFGEKALALDGDSGLMQKEEFERQTVESTTTLISRNPSARRLTTDEESRIEIFERVAPSVVYIDTFSERRVNEFSTNTLEVPIGSGSGFVWDREGHIVTNFHVVQQAKTAQVTVLTPGGDKPSVRPAYTSARPGTILPDFVKTVYKAVVVGADPAKDIAVLKLVDIESAAEDLKPIEVGTSSTIRVGMGALAIVCFTGLDHTLTGGIISGIGREVKSPTGRPISNVIQTDAPINPGNSGGPLLDMEGKLLGVATAIYSPSGASAGVGFAIPADTVSYIVQMLIEKGQIVRPLLGIALLESKQARQALGVTKGVLIAEVIKGSSAESAGLRGIRS…
ToTryp42	THAOC_31278	3967	Scaff_g45024: 9748-13714	1163	6.36	129.214	MRSSESQIDVSHTSALNFISFKWAKLLKVIFVGMALSGKTSIIKRLIEGQDAKIPQSDERTVGVDIYEWDPKQAGGAASDSLMTRIPVDSELESRIKGSTGVKFSVWDFAGQHVYHATHELFFSTNSLYVLVWDMGANNPETIKKQKTFTEGEQGTFKLTYDSSDEEDDDFFDTEHENRRATRALEQDIDEKLQFWIDCIQSSAPGAAILPVASFDDYFTEGVGVEEARFRCRLMRERLLKHEQHRVKNMEQRLKEYDAKFGASSELAVRLRKLLCSFNRPKIIFGTDGPDVVRVSSTNFTGFDDLAERIVGISTGRERAGKPGSAPYATSRNRICPTYRLILATGWNYPIFRGHLGARIPRMRLAVRDCVRSMRDRFKVVEWGFFLDELKKKDIDNAA…
ToTryp43	THAOC_31765	489	Scaff_g45475: 2707-3195	163	3.56	17.9572	MLCAEHPKRRDACQGDSGGPLVKIDGSGSGEEFELVGVVSWGVGCAHDDFPGVYARVSAEYRWIKEEVCKRSSHPPASFSCGGDSSDNDGFDDSPTLSPSTFGQDDAVEQDDDDDDDDDDDDDDDDDDDIYYYMDDDDGGDDDDDDDDNYYYMDDDDGNYYY
ToTryp44	THAOC_31839	342	Scaff_g45552: 573-914	58	3.79	6.05757	MVCTFDDEGPPERDACDADSGGPLVYNNGKEDVQVGVVSWGPPDCQVEPGVYARVSE
ToTryp45	THAOC_32701	777	Scaff_g46396: 915-1691	224	4.67	24.7971	MRFPLVLSALFAHHGAVATRESEVVLDPPGEEPIIGGTNLTEDQFVSEYRWLSMIAWDPGRTFLANICGASVVGPNAFLYAAHCDEGIYVDDGDFFLVNIYDRRKDVPFEPFEPGIGAGGENITQYIIKESGKLYSHPDYNDETFSNDLALFILNEGTVVPEYIPFVKMNFETYFPAFGAFYRALTAIALTLLTYFASAKARKFKQWAGDLRILVLTQGPGSP
ToTryp46	THAOC_32973	2488	Scaff_g46728: 123-2610	661	5.67	72.7225	SPRCTCPRRGTRRRAARVGVRLQVPVRRRVVPRVGEDRVEELAADLAPGELEPVRRGPPEVRRDYLEVVVLGRRFEVRGEGRVRAGSAGRGRRPVRVRRGVGVLERHHLPQGREAEEDERKGDAARSGTLPRRRAGSRRSHGAFVAEGAAATRRRMEEWPVAQAERVRAITYLQSFDFRKRLADYQTSQEKMNQRSTTLIVLSTLAAVATGKTIRGGEHHRELQRNRIIGGSEAQEDRYSFAVSLQDRIGHFCGGTLISPDTVLSAAHCGGGGYDIVVGRHDHGDRDGEVMSVKKERKHPGYESDTTHNDFMLIFLDKPVSVNNVKFASVTDNFVGVNEAVTVVGWGDTDIDLDEEELPDELQEVEVYTIGNKECDDSEGVIDGERDNYNGQITSSMLC…
ToTryp47	THAOC_33472	2504	Scaff_g47289: 1745-4248	625	4.66	67.0918	MNPLSTTLFLSTLAAVATGKTNIRGGEHHRELQRDRIIGGSEAQEDRYSFAVSLQDRIGHFCGGTLISPDTVLSAAHCGGGGYDIVVGRHDHGDRDGEVMSVKKERKHPNYESDTTNNDYMLIFLDEPVSVDNVKFASVTDNFVGANEAVTVVGWGDIDIDLDEEELPDELQEVEVFTISNNECDDSEGVIDGEKDNYHGQITSSMLCAEHPKRKDACQGDSGGPLVKKSGSGSGEEFELVGVVSWGVGCAHDDFPGVYARVSAEYRWIKEEVCKRSSHPPASFSCEDDSSDNDGVDDPPTLSPSLAPTLLPTTFDESIELDPTLSPTLSPSLAPTLLPTILAETDSLSLSPTLLPTILAEADSLSPTLLPTILAEADSLSPTLTEEDSLSLTLRATSL…
ToTryp48	THAOC_33916	4229	Scaff_g47689: 687-4915	1046	4.54	112.708	MAAAAMSVVANARSVASIMTANDGFNISSAGKGLRSQLDAYRSLEHYEFEVEYCTPAGASYLESQLQDEVYADSDRDVDVMCGCEDGFAECSATFNEEECAVSVCTIERTITLWRLLDDIAPFLLSIHSTTEYTSGGANMHSTSALLAVTEEEGLECLGFSVDHNQEKVTSQMLCAKEDGKSSCYGDSGGPLLIKGADSSQDLQIGVVSWGVGCGEDAVVPGVYARVSSAYDWIRTEVCKRSVDPPASFECDESAADDTERSGHAKQERIVGGEDAKVGRYPYAVGLESILFGEFCGGSLIAPDVVLSAAHCMNTGGFVPYNVIIGRLDLEERTDGESLAMAYELKHPNYDRLSTENDFALIYLASPTYNYEVVQLNQDDNIPQSGDAVTAIGYGYTDM…
ToTryp49	THAOC_34437	1483	Scaff_g48180: 2460-3942	258	6.06	28.5964	MESRDIKLRPVRPAFAIIEAMTVHVETKGLGCECWMIGWALTSLDQRGHPLHKSISRVAGRSLMGVQTRRRLIIGGHEAPPGRFPYAVSIQDETGHFCEDSVTVPVDNKFVHPEFNWANVDNDLALLFLPRSTTADVGYVVINKDPRIPDGISPATYLGWGDTNPFIILFTQTTNSTYESGRDSCQTDSGGPLILKGDAGTEDVQIGVSSWGVGALHRASMFDTLNSYPQDDVFNKLINRLRISDFPRCRRPHQFEL
ToTryp50	THAOC_34577	1426	Scaff_g48259: 166-1591	354	4.02	38.395	STITNDGGTPPKGPRVLSPSLRRGLPAGPRDTDDVPRYKTISWAVHDDWTPSHDPGGDLARVILSAWGTSAIVTKETPQQAITSLDSAKFFVSLFDRGDCAGAVIGDNYVVTAAHCVCGLEEVNVIDYMNDEHYAVATYTNPDRPFNCNRDGPNSNDVAVVEFSGRPFRNHDARPVYSSSDEVGKTIWILGMGIHGQPDDFPNARACRNGVQDSNLREGYNTVDQADGILAYTMKPSTGGPALINVNGEWQLAGVNSGTDENNSCDWGSVDQYCRLSEHAGWISRTMGDAVEQDDTVGQDDTVGQDDAVGQDDAVEQDDTVGQDDDDDGGDDDDDDDDGYYYYIDDDDDNYYY
ToTryp51	THAOC_35275	1791	Scaff_g48707: 962-2752	597	5.01	66.1031	CDVVEMIPNKSYVLFTYKRLRDVRIVYVPPKSLGNFGGDTDNFEWPRHTADFTLLRAYVPPPNGDSDSSGSWDGYHPDNVPYDSSSSFIRVRKPSPSTNIRENDMVFLLGFPGSTMRYAPTPRLRYADEVAVPKMVKDFSRKLQLIDRFEGDSPEAALKMGSTKKGLANELKRSKGKLVMMRKLKLLEERSAEEGLLVEATAAAVTTKGEKSVAEILERLEGIYDSFRSAEAIASALNSLRGIYGGSAFLAAAHSIHEYLAEEKAKPDSDRETTYRKRNLPFLTKRLTKRLKDVYLPHEEELVKDCVAVLDQLRASGGHQDDDLLKTCLGGISETVLKDGETAAKAVVEGASKLSSMSMDPELDLLTEVFSEEDDSDNDTDKSASWLEDPFVKVAASLF…
ToTryp52	THAOC_35292	3448	Scaff_g48719: 135-3582	785	5.45	85.7292	DPRSSHRRQVGFRLVRVSVGSQPRSSTGGQGVALRDLLPYVDGPAMANIGRRCTMEVAEGCIPDQNRPLVPILASAKAVDPTITDDFGLEVERRSTPRNYTPQPDRSSSKIMPGRRRRSVPTTTLAFSLVISAVRAAPAGDGGDQSAVRHDGVYRRRLAQSAAEAFAHWTPQLVARAIPLDLKIDRQDDTVYIAGEDGYMTSYAEAFAGGRGADVSSEYWDSILHVEDLLPGDGDSGQAMHHKSSWNVIKRLYPEEEISSPALRGRRDMGGRRLDGEVKLIHLDDLEFSTVEVKSTTEADEDLEFDIEFEPDNETDFPIEEEGRGLQWKTQTPGQGSRPVARNARKNNNNNNNNNARAKKKRLPRMNSIKPTRGALIKDKQTFSAKILPSQTTKSKIDT…
ToTryp53	THAOC_35304	2187	Scaff_g48727: 3232-5418	659	4.56	72.1116	MEEGTRLRMTSTRRHRRLLCSLTSAAAATLCLSSVDASLHKRNTGVLTSSAEALDRRFASQSSNLRRRSDEFDPLGGTRLSAAVLGGLQSPPSRELVEAGDHTKIIGGSVVEDGKYSYIASINYFTSHFCGGSLVAPDIVLTAAHCAGYATQIELGRYDKGVAMSGDAERIEVAFEIVHPSYDPNNVNNDFMIIKLVEPSTRHNLVSLNTDPNVPNTQGEKLQIMGWGDTVADDDVNVPGVELLEAELEFVPNAVCQSKEGRMENGDYVDYFAAARPQGMINDNMMCAQDMDSDVVDEDTCVGDSGGPMVLRDFDSNGDLQVGVVSWGIGCASQIFPGVYSRVSSQYGWIRQQICVNSDDPPASYKCDELSEEELSGGVQFPVEEEEATDGKTFVTVEV…
ToTryp54	THAOC_35914	1569	Scaff_g49191: 2434-4002	523	4.52	56.7343	MLEARPRTDTPEEQPTTDPSLPPSCHPSSPHKSLRTQSQSGETMMGYLSKALLLAAATEAETRSLRGRPQHHHHQSAHTVQREAIASRNRIFPGDVSVEGRYPYAVSIQDDISHYCGGSLVAPDIVLSAAHCKTDDANEGVKVVVGRHNLEGDGEVISASLELSHPDYDFQTTDNDYMIVVLERAVEADVDLVQISPDVVPVDAAVTVMGWGDTNIDLDISELAIELMETEVRTISNEECDASIGTLTDSLGSYDENYHQQITGNMLCAENEHRATDSCQGDSGGPLVIRTAVGDPDLQVGVVSWGVGCAHDAFPGVYARVSEKYEWIRTEVCNRSADPPAYFNCGELRTQETTPSESAWEEIVDEEFLTGLGIFNSHGNGDSSRHYPTAQNRAGVVRV…
ToTryp55	THAOC_36558	3084	Scaff_g49831: 592-3675	979	4.82	101.242	MKLSPLVSDGALALLLPAAAAVAPSDAQPELEEGRSLRKLKYKQGLFTPQQSGLFTPQQSVRGRHGIDQSRNVFAVDPEATVPTKEQLGTDSTDGPTAKIVDGTEVDPRRKYKFFVSIGGCGASLVAPNVLLSAAHCAGIQGPAVLGLHMNTVDGANEFEHVEIIPFAQSTTHPQYNGNTENNDFWVIQLQHDSVLYKDEIIQLDAPTGDDYELTSGVDLTVVGMGALASGGSFPNVLQEVEVDYMTNAECCSGTDYPCSEITDNMMCARRLGKDSCQGDSGGPIFDTKTRRQVGIVSWGYGCADFDAPGGEKFVCSRCCAPQHYVIIDSLSAEPHHQVYSRVSAGYDWITQQISAYNSNGNNPPPQKVAGQRYDNPEGFYDRDGPEYSCLWYAISSNC…
ToTryp56	THAOC_36713	1501	Scaff_g50020: 672-2172	471	4.53	50.8895	MNQRSTTLIIVLSTLAAVATGKTIRGGEHHRELQRNRIIGGSEAQEDRYSFAVSLQDRIGHFCGGTLISPDTVLSAAHCGGGGYDIVVGRHDHGDRDGEAMGVKKELKHPDYESDTTNNDFMLIFLDEPVSVDNVKFASVTDNFVGVNEAVTVVGWGDMDIDLDEEELADELQEVEVYTISNNECDDSEGVIDGDRDNYHGQITSSMLCAEHPKRKDACQGDSGGPLVKRSGSGSGEEFELVGVVSWGVGCAHDDFPGVYARVSAEYRWIKEEVCKRSSHPPASLGCGGGSAAQTANPPQNDLFEADDSEPEPSAASMFLSNSSGSSGSWRTVMNEDFRGGFGKFRTGGNGSKHYPSAKDRSGVALIENTSTLSSNAMSLNSGESRIRVDFSAYVVVFE…
ToTryp57	THAOC_37370	2502	Scaff_g50889: 2489-4990	636	7.57	67.1773	MASSKLIAISLLLSLAAANAQKGLRGSESAGQTDPAEPHHLKTHALGRSRPKKAKRTSKKLTKRQNKARNQAREIDSSIADSIAGRTQAQQAETRENEEDSHPAGGEHADKMAPRVINGDEAPRGKYTFAVSLQDYGHFCGGSLIARDYVLSAAHCKGGRYDAVVGKHDLRDWGGQVIEVAEEIVHPYYNDWTTDNDFMLLRLRYPADTQYDIITPNSSNSKPSVGSKVDVMGWGDTHISDRVEQLSDVLMTVDVKVMSNSDCDDSEGYVDGTYGNYHGQITSNMLCANDFANREDSCQGDSGGPLVQGDSLVGVVSWGIGCASNHFPGVYARVSKAYNWIENEVCKNSRYKPDWCGGSSSANAPTEDKPSTSAISDGSGSGGSGCKKHDRKSDCQDAG…
ToTryp58	THAOC_37544	6984	Scaff_g51127: 1-6984	1742	4.96	186.552	MRFSAAVLPIVFIAKGASAIITKETPQQAITSLDSAKFFVSLFDRGDCAGAVIGDNYVVTAAHCVCGTDPSGVNVIDYTNDEHYAVAIYMNPERQFICSRDGPNSNDVAVIEFTGRPFRNHDARPIYSSMEEVGETIWILGMGIHGQPDDFPNARACSDGDQDSNLREGYNTVEQANNGVLMYTMKPSSSSTSHSREAIAQDGDSGGPALIEVEGEWQLAGVNSGTDENNSCDWGSVDQYCRLSEHAEWIYKAMDDTVDDASRGIRHTTDLETDSSYTAALCEEQSQNSNNPRNKYHLKVGPNTNLTGFSGWKYIIEAIKAMLAPLTQLVVALLALASASAVDDNKRKKDKREVDLNLDALQKLHMIKKQYDDLRAELESEDEDAPGGSLDYSHTQPFH…
PtTryp1	Phatr3_J3211	1925	Chr.1: 478221-480145	625	8.89	67.6827	MMAYPENVVCLMSLLLAGQHFLSTRGFVLPTDSSNIAYRGLLLSTNRRRSSTQLLQRVEFSASNSTQPDDVPKRKRRLFRLPIKRRREDEKQRATPSVTAGLPTAPNSSDSGSDRPSKSLQRRRGSAQQKKKHSRDTDQKQGKSWLGRIFQLVTLGCALFVVSPILSGELGEQWDVRAKYSSTRPSYRAALDRSLDERWSIGIPPDDKATTGDESAPSNSREDSVPLVPHFEKGKKSKLADVSVEERRAVSLGFVTEAVEKIGPSVLRIDTETHLLEEETVGLPPRGPGFVQQGQGSGLIFSSDGFVLTNAHVVEDATKVTVTLTDGRMYQAEVKGADEIVDIAVLKILPERSADGSTLPLKDLPVAELGNSDKLTVGQIVVAVGSPGGLDNTVTMGIV…
PtTryp2	Phatr3_J54319	1854	Chr.5: 598945-600798	627	4.34	66.2609	MKFLPTALALWLFQEVLANDNISQATEDTTTSRHLRKPKKTKSIQATSVLTVNENPPLSPVIAESRIVGGEDASVGEYPYFVLGNGCGASLIWKDIVLTAAHCGNAFNNRVLVGAYRYWSTNFEAEWINVAQTVRHPNYNGNTEANDFMIVKLSSASSATPVIINMDASNPSINESLTTIGFGATTEGGSGSNILQKVTLNYINPNTCNSQYGGQIQEDIMMCAGVQGGGKDSCQGDSGGPIMDSDGVQVGVTSWGIGCARPNYPGVYSRISGVKDWINGQVCALSSDPPPSCGGGGGGDSGGGGGGGDSGGGGDDTGFTVRVVVKHDDYPEETGWTVFGSDNAVVLSQTEGEFQQDGGTVDKSAFVEEGQYTFKIVDMYGDGICCGFGRGEFDVYVND…
PtTryp3	Phatr3_J45961	1490	Chr.8: 783171-784660	372	5.05	40.7753	MTKRLAVAFPLIYVLVHLCLSMGHGDLRKSQNSEHRGLIINGRNAEKGRYPYFVTLDHNGGGVLIAPDIVLTAGHCKPRKRDNLKPRVGTYSFSRDRKIVDYEQFDIVDMVRHPGWIQVNEDDFIWDFLLIKLDGKSNKPVIKINRQADVPYEGQYVVAMGVGNTNPYFESKADTLQEVPLEYLSNDMCSESFDPARNLTYQDHINISMMCTTGGPRNERDACSYDSGSPIIIPGKNSEQDLLVGLVSWGELCADPDFPGVNSRVSSVSEWIDSVVCELSIDPPSDFCPERTDARSWHLMLMVVGIIAVTMAFFALCDCRAKKSLGVGDLDKSDTLIEKELLCNTYASRSEGESYGSIEAIALTTD
PtTryp4	Phatr3_J13240	1401	Chr.11: 681424-682824	473	7.68	49.5969	MRALVWGFLFLATAHAWVLRQRPPSLQVSVLPQLQQTPRSDADKCADETTTRETSRRKLLQTSAAMAWLSACGSPAWALDDSENKRITVFEKTAPSVVFIDTFTERRDVFSTNVMEVPLGSGSGFVWDTEGHIVTNFHVVRNAQSAQIAFLTDGKDIANLSLPPASAAINNPYSSMRGFGSMSANVKRSVYKARVVGVDPGKDIAILRVDAPKEILAPMALGTSKGLKVGQYSMAIGNPFGLDHTLTAGIISGIGREVKSPIGRPITNVIQTDAAINPGNSGGPLLDSSGKCIGMNTAIYSPSGASAGIGFAIPIDTVKFIVETLIRDGRVVRPVLGISYLEYKQARALGINSGVLVLEAPAGSPPALAGLKGTRRTESGLVEIGDIITKVGDKVITVE…
PtTryp5	Phatr3_J37254	1107	Chr.12: 525221-526327	374	4.57	39.6604	MDSVGATNTCESETLTCCQLFTPSNSHRKTNLRSVERIVGGETATDGRYKYAQITLQLPSDNHQCGGSLIAPDIVLTAAHCDGYSTVHVDRHNFKDVDDRYQVFEPMETLQHPNFDEDMFRYDFAVVKLNISVNGIDPVQLNPVSDFPADGQALTIVGWGAVRVNGNGFLFPDTFQEANVKAISNDACSQTVVQNKTLYKDEIFPEMFCATAPGVDACGGDSGFPIISRGATAAADVQIGIVSWGRGCAVYPGVYSRISYVYDWIRESVCIMSTAPPDVFECVQKVADEGVASPKRPESTPELGNTTNGTSTPASGVTKETGDETVRGDSSRPSDNQDGTRSFACMPVCDIACCVLLSFMGMVMTAIA
PtTryp6	Phatr3_J49223	1392	Chr.21: 271512-272903	470	9.1	49.8078	MKAVISCASLILLSFLLVESQSFRPSAGTGVRPFSFRPHHSKCSSTQCLATISVPASEIEQNLSQDERVVVSVVRERGPSVAFVTSVLPDQRPSPQIRGRRRDNKTDDSFNLPPGRGLGSGSGFVVDQQGYLVTNYHVIERAYQLQRMSEIYESGLDRLAQNVTNITGLAFRTVNTTLQQILNPTTLRAPLPKVYVRINSKTDYQLCQIVDVHPALDVAVLKIVTPKETSPWLAPMSFGASSDLLVGQGLIAIGNPFGLDNTVTTGVVSALNRELRTRGNDGMVSPPIRNCIQTDCAINPGNSGGPLLNLKGEVVGVNTAIVTTSGSSAGIGFAVPSDEVKDVVERMIRTDRVKKGTQYQAWLGLAIVKATSNCTLGSKNWVAKVMRKSPAAEAGVQAI…
PtTryp7	Phatr3_J49602	1677	Chr.23: 167354-169030	567	4.53	59.3656	MLIWLRSSSSTATVIAVLLVYRAAAVASALWSVSEYRLVDSSSAREPLTNDAKRVESRIIGGEEAIPGEFPWYASSSGSPGSGICGATLIHDDIILSAAHCSGQFDQGVLIGHHRFGEITEGAEFHTIDMEIRNADYDIHSQTSSHDAMLSRLTKPSQKETIGINSNEENPMTGDNLTVMGFGTTEFQGGRSTQLMRTTLLAVDFDTCNAQYANVELEPDVMMCTGFPGGGRDTCQGDSGGPVVTSDGTLVVGIVSFGVGCGLPDFSGVNTRVSGISRWIADQVCRLSLNPPADCPGIADEAPVLRIEIAYDMLPAETTFELKDEGGNVVYAGPEYGPEATDVWITELIGLPENQSYSFTIFDQFCDGFLTFQPVKASFVELYWLENAATKVLLARVDG…
PtTryp8	Phatr3_J7679	2181	Chr.23: 460233-462413	738	3.98	76.6294	MIPKVTAMASYTLLLFLLAHPVGAASSLIKEVPQELKGKNANLDSTSVSLAIVAPEDAWEELLPGHDDKEERSLQDEIPTITLYNEAFGSDSHTTGSFTELGSNETLRAESPALDALLAPQVIESKIVGGEDATAGQFPFYASSSGRPSLCGASLIRPDLLLSAAHCEGAFTGGVFIGSTRLGQNGVFRSVAAQIPHPLYNARTIAYDYMIIQLTEPVTDVDPLPINLNPADSPTGGEELTVMGFGTTSFQGSISTTLQHVNSTAVSFATCARQYRGISNIDRDIMLCAGTQDNEGSCQGDSGGPLINANGVQVGIVSFGVGCGDSDFPGVYARTSGAADWISSQICTLSANPPASCDDSVVGADADGGVATDPPSNGDGNSDETTTITLTIQVDSFPW…
PtTryp9	Phatr3_J40462	1764	Chr.23: 467199-468962	596	4.6	63.8685	MNIPQSLLSLLVWAVLLFHSSIAQRLRAPHSTNDEPVAVEALPSKKLSSFRLLSNSSIEETRTLALLTEINLTAPTTQPMPEISPRIIGGSLASAKEFPWFAAASGRFSCGASLIHPRILLTAAHCVGAFRSDGVHIGAFRRGSTVRGAVFRKVIREIQHPDFQETSFSNDFMLVILADPVNDRDPVTLNTNINVPADNQELTVMGFGSTLYGGSVSKNLNEVTTFAINHNTCRDIWSTNFPRDVQLCTLNRGKGACQGDSGGPLVLANTNIQVGIVSFGAECADTKPSFPAVEARVSGAIGWIADTICDVTGDCDYISNMNNRPPPTPGPVTLPPQSKTATLDIVFQYDAYPKETTWSVLSDDQPIFVGPNYEPGLYERWTSTFDEVPYGDYVFQIDD…
PtTryp10	Phatr3_J49772	1749	Chr.24: 251021-252769	591	6.21	61.6067	MFLALWLFYFTIAVSAEGANRVRRRNVNGAVVANSDEASSVRRHRSDIILDLATTVHTSNFATLDKIPPRKTKDATNDRQLVGWNPADMFQEIQHNPTIVGGGDAEKSDAPWQVMILFWDAANNRWEPTGCAGTLISDRHVLTAGHCAVDNGNRDEGVYVGAYEPFGENPGVPFHFSLIQSHEVHPEFDNRLNDKDAAVLTLTSPVSTSLFPPLQLAGPGFPIRDGDLLKIYGFGRVAEEDASAVETLQVAQVPYISSTRCSRYHSNIRADMFCAGFLDGGVDACQGDSGGPAIRELDGIPYQVGIVSWGVGCARANHPGVYASVAYVHEWIRDTVCASKAVAGFALCAPFGDANPDLHLVPTVTLAPTLAPTVIPTLAPTLLHTLPPTLPPTLAPTLP…
PmTryp1	PSNMU_V1.4_AUG-EV-PASAV3_0004340	2274	Scaff.8: 8916-11189	402	5.18	44.3269	MCGGALISKRWVITAAHCAGASSSFEINGKHYTHTREVLHSGYDDRHMNNDIGLYQLSEDLIDTPYLRMSPVKITELSSSMAVIGIGDTKAYLHKTRKKETAPLELKLAELDLVGFADCVEPYVPHGDAEYIDPDSMICAQKLGGDSCQGDSGGPMFIPDALDRPDQDLLVGLVSWGYGCSDMEFPGVYTRVSYHYDWILDNICSVDPEGAPEYVDCNTIINGLVTSVPSTXFPTIPVNQEXSIPEAVITPDVEAYTPKATNPPIKRPPKMPTNPQAMNPPINRPAKLPTNPQADRPAKLPTNPQTKPPAGKEMYDEINCPAVFPRSGTPCVMVEPYKYKKCMYYEMGPDVSCSCRYDSLYYICTGNFYTNVPDISVYSKRGSKKKKDGFLSFLMEWFG…
PmTryp2	PSNMU_V1.4_AUG-EV-PASAV3_0004340	2274	Scaff.8: 8916-11189	355	4.77	39.1731	MNNDIGLYQLSEDLIDTPYLRMSPVKITELSSSMAVIGIGDTKAYLHKTRKKETAPLELKLAELDLVGFADCVEPYVPHGDAEYIDPDSMICAQKLGGDSCQGDSGGPMFIPDALDRPDQDLLVGLVSWGYGCSDMEFPGVYTRVSYHYDWILDNICSVDPEGAPEYVDCNTIINGLVTSVPSTXFPTIPVNQEXSIPEAVITPDVEAYTPKATNPPIKRPPKMPTNPQAMNPPINRPAKLPTNPQADRPAKLPTNPQTKPPAGKEMYDEINCPAVFPRSGTPCVMVEPYKYKKCMYYEMGPDVSCSCRYDSLYYICTGNFYTNVPDISVYSKRGSKKKKDGFLSFLMEWFGGI
PmTryp3	PSNMU_V1.4_AUG-EV-PASAV3_0008150	2415	Scaff.19: 45526-47940	690	4.88	75.2639	MPESTPKNPRPATPARGKSDSASDAPVHDLHRRSRQATLTRMRSSPPQSPPDAAAGSNHHGDGMAPSLFWPSNSNPTKKPAASVPGEETPVDAEYCNNEGEEYDDYDEGSYYHDCDYYDEVFDSIVKIYATHNFEPDTTMPWQKQKSYNSYSSGFAINGRRILTNAHSVEYAGQVLVRRRGSSRKYRATVEVVANECDLAVLTIADETFWTTRTEYDEDEDDEYDDYEEDEEEEDGGSEKGAVAEASPGDDAIKPLSFGALPELQDEVEVLGYPTGGDSLSVTKGVVSRIEATEYAQCSGSHLLAIQIDAAINGGNSGGPVVDAATGRVVGVAFQALEHAENIGYVVPVTVVLHFLEGLQRHGGTYSGVTCLGVRYSRLENESMRRYLKLPDAVETAKP…
PmTryp4	PSNMU_V1.4_AUG-EV-PASAV3_0018360	2239	Scaff.48: 156447-158685	618	4.54	68.08	MTFEQQSIGRPRRRPSSFRFEKKLAIAALALAIVFVADSMGSAAATNIARSMSSSAYEDANSNRVGGDTNQSHGKSNNDIRSNSRKRQLLDLSYDSFPIYTLPEPWEETPILELDASLQPLGDGPNEDSDNDNYFPPKQSRIVGGEEDSNLDSFVMHLRYVAADNRWKFAGCGGTLISACHILTAAHCMTGDRANRTQAVFVNAWRPFAKNLDDTTGRTKPYHISRIDSENAVVHPGFDIKSNLNDVAVLTMTKCIPANRTESFEVMEIADDVFWRERYNELVVPYKDWNEDWNVDPETATISDDLADAKTRVAGFGQLDTSEAGVPPALQSVDVSLINRDDCEAKYSSSLRFQSANKTMIKPDMYCAAAIDGGKDACLGDSGGPNYITDPVTMQRTQL…
PmTryp5	PSNMU_V1.4_AUG-EV-PASAV3_0017910	6468	Scaff.49: 50816-57283	532	4.75	59.1678	MGTTVLSVYHRHLSHYKXKNTRKRFTGVRRDWNSMVQRRVNTRTDFVFWLVPSITVIALLLSAWGCRVAATEYQSTERNSNLRGHDNVVMQPVPRIINGRDVDRLRYPYFSLMYGTSLCGAVLIAPRVALGAAHCEMASDRLRIGAFEDITDGQSVKIRSTIVHPDYNIQLLEKDIILFILEEEADHPYIEMEKERIEGGSFTVLGFGDTDKGDPMILSDELQEVELEYVDNDTCDYGHGDKEEILEDMMCAAGYGKDSCIGDSGGPMIRKGNTREEDRLVGVVSWGRGCAEKGVPGVYSRVSYFYDWIVETVCNEFPDEAPRYMRCTSGSVLEWLHQAREIQTTAPTFKPTXEPTKSPTNIPKENSTEEXTXESLLGVILREEPTREPILGVIPRVSI…
PmTryp6	PSNMU_V1.4_AUG-EV-PASAV3_0023510	6959	Scaff.63: 30376-37334	2079	8.7	231.011	MSGYGSRRTSNAATRAEMIQAGQRSRPQPIHAPPRQPINTVPDESEPSYSYEEKSFLPLDEEDAIDTFHRQIGNFVGRPGRGRNFGSSLSSGASNTTYQPFGGRSDRESSRGFYGGDAIKGSSVPEKKSDNDQVGKSKGGGGNKFWRTTSREADSDKNTRTRDRTTLVGNGYTNEAVNDGGRKDERSHFNMIGKSRQSGGLFASARKHTKQAANRNGKVENHKLQPGEQFSRSNSSSSLNNGEARRKSKKLDEVRRLKADAQQQRGEDGAVVDNGYYHEVPTMGMQLSPINHNRNHIDSQKLATQSNLMTALEEEMSGDNCTTDNSYEYDGSHTFLHSKMESTVNGLPHGDIATTTSHKNGDTRNPAHASYQREPFQQQIAYTSPMSATGAAVAKLSAY…
PmTryp7	PSNMU_V1.4_AUG-EV-PASAV3_0026830	1834	Scaff.72: 105576-107409	530	4.72	55.8329	MTFLHYLPLLAWAAALSSAPSADAVTTSGDPNDPKFLANVATDAPFFVSLYQRGDCAGTIVGRHHVLTAAHCIGDTRKPPKTILSDGTSVLPISAYMNPDCPYNVQRDGPNKCDLAVMAYREDLFERLSPLAGGGQPLSLPVFSGSDEVGKTITIYGYGLSGDAGQLTGNNGCRKADEDGRFRRVQNVVTSTTGSTSASGGVVRYKMDRTNDGGLALEGMAQDGDSGGAATVTVGGVVYLAGANSGTMERNSCDYGSVDEYVRVSRHHSFVSKVLRCDASIGPWKNWGNNNNNNNQLCIPSPTPDPVPNPNPVPSPVPNPSPIPSPTPGPIPNPNPNPNPNPNPNPDPIPDCPLTEKKQKKFRIRWDNRKMRGTCKKLSKQSGEDIAEICKQRLLGKKH…
PmTryp8	PSNMU_V1.4_AUG-EV-PASAV3_0038680	2925	Scaff.115: 184666-187590	746	4.9	78.2783	MASGWRRCHRRRAVVFVLAVCLLEGLFAHSSIDWDRSTPGGAGEGRGNRRGFSLRRRRTTEAAAQPSKRIVHGVDVSGPRMVGGSDATNAYPFFLLWGGCGATLIHNDIALSAGHCSRKDRAQVGPTHRTDTSNAWTGVSQIRTHPLYDPQSLDYDFAVLKLGGWFQNERVRLNTNGDAPYEGESLTVLGFGGQSSTLKEGRVASIGSELCRDQWRLAGYSIDASASVCTVSDQGVSPCSGDSGGPLLTASNTQVGVISSGSDCDGRLPAVYSRVSVASDWIAQQICELSDFPPQECRGPFGNERYVGAEILRIDIHLDEYPRDIRWRITTGEGAREVASSGEFXIPNSTESRFVYLPIDXYYEFTIEDVGGFGDGLGSRGNYKVVTVDSRGNDRDTLV…
PmTryp9	PSNMU_V1.4_AUG-EV-PASAV3_0040710	3486	Scaff.119: 61976-65461	704	4.84	76.284	MASSCLLLGLVLLASVSSLAKAESEESHSLLRGRNLIIGGGTTGDRFPYYVALKDANREIQCGGTLIAPDIVLTAAHCRNSDLIYADVGKYSNIEEDGDEEIEIVDPLLMKSAAATGGTVGMLESSGAATIDKSGFIHPQHDLQKRSYDVMLMKLKKPALGRKLMKINEDPAFPVKQAGGRNEITIIGMGTTSTNGFAPKPDELKQVHVDYLTYEECIKTNSFNLNYKFELXPHMMCTFGSGIYSQRGQCYGDSGGPYIVKGRSAAEDTQVAVVSWAVNCASDVFPMVGSRTSDPHTLKFIKEVTCSMSTMPPQGLCSEENNGASNLSSRLNVPNGVTVSVRIFADPFGHELKWQLVDRSDEKLVYAEIPYGMISGDHLFQDVVVPAGGELKFKIDDAA…
PmTryp10	PSNMU_V1.4_AUG-EV-PASAV3_0048230	4745	Scaff.148: 297056-301800	1182	5.05	130.484	MPTRCDRCHRNNTDFPHRRYRCRCRRCCHRLGIRSMCRSVCLAVLLSAWIEAHSHSSTASVAGATIDAATNNNASRGEKTGGGGSITSGPLEENERSDSLLRGAGTETTARRLVVGGRDAPSDRYPYFVSLQEVYNGTHRCAGTLVAPDVVVTAAHCKDEIGFAQVGKYSAGPVRSSPGGGGGGDTTEMQRVLGPLHVHPLFNAGVSFSHDVLLFRLERTSAKQYVAINTDPGVPRATGNSGSGGHGFGGQGDRNGSNNHGEEGNNLTILGIGTTTYTKFGASTNPKVLQETNTSFVPNRXCRRSKDPDVEDNYQNLISDDMLCAFETNQDACQGDSGGPLIKKGNSPSTDVLVGIVSWGFGCAHPSFPGVYSRISYVSEWVIATICQLSSAPPIEYDC…
PmTryp11	PSNMU_V1.4_AUG-EV-PASAV3_0050330	2164	Scaff.159: 70916-73079	584	5.81	63.4911	MGGCGGALIGPDVVLFAAHCGSLENQEINIGAYERRTATKLKNASQSRFCEEYKAHPNYGTGGSSINNDFALCKLDXPVNIDTSFVQLELDEGDVSLQSGDSLIVMGLGALNEGVSGPZFLHDVTVPFVSNDDCNAESSYKGGVTDQMLCAGFPEGQKDACQGDSGGPLVKRIVQSNGTFKDYHVGVVSWGHGCAQANKPGVYARTSSGIDFIKNTACNDFKSTANFCHNSKSLPSPHCDVELKXRLQTDVYGFETSWTITNDRRQEVKARKYLLKFHAHZHSVCLEKGTCYTFEISDDYGDGMCTTDNGCGXYELSVNGQTIHEGDGKFEKKETKDFCIDRNGNAVEXGDPTPAPVTPVTPVTPVXXPSPNGNCGGKRNKQFZVQLKIDDFGGETGWI…
PmTryp12	PSNMU_V1.4_AUG-EV-PASAV3_0055570	2222	Scaff.183: 18766-20987	460	4.32	49.6378	MVPSSAIKRLMLILLMAXTVWASQSGLGQGEIAETGSAKPSLRGGDRRRELEGDSFPKKRPRIIGGQVADSGRFPYYALMNGSNLCGAVLISPRFALTAAHCQDADRDFAIFSQTRKIGTEIGVVDRAVHPLYDDFTYSNDVAIFELSEDATDEDGTPAPFVRLSPTEIDTVGTAMTVIGYGDVDPDEDVTKFSDNLXRVDVRYITNPECNRDHRGEISEEMMCAEDTGRDACYGDSGGPLLLTPDESDFNQDVMVGIVSWGRGCADAEFPGVYTRISYFYDWIVGTMCVLNAEKVPPYVDCVEILGIDVTDPNDNVDNREEELLEEDDEQEQQPSPQEEVDDSPEEEVPPVTEPPRTSPPTPAPVPVETSPPTPAPITVETSPPTPVPVSLTXPCGGR…
PmTryp13	PSNMU_V1.4_AUG-EV-PASAV3_0057600	2770	Scaff.192: 197736-200505	697	5.1	75.3071	MTPRSPNSILLAWLTASTASLLASASNNHLRNQRQKHYEQQRIVGGSRSTAGDYPYFVEMGGCGGALVAPDVVLTAAHCGNLTGRQLSIGAYRKGSLAEGAQPRFCASWIRDPLYGSHGSPLNYDFALCKLDYPVSINTTFVTLELNEERAIPSIGTDLIVMGLGTLSMGGYSPQIVHNATVPYIDTPACNAMFSQDDDVVTDAMLCAGFEEGKKDTCQGDSGGPIVKRTYNGDGTFSDAHVGVVSWGEGCAMPNRPGVYARTSERASWIKSTICGTLNSVASFCEERSEQTPNVCTTGEELTIELTTDMYAFETCWALWELSGSLLASFIYLINNYTNVHTMCLEPATCYVWEVVDAYMDGFNGTYSFLLNGETIGSGTGTDFDKSKTETICTTGGSL…
PmTryp14	PSNMU_V1.4_AUG-EV-PASAV3_0059750	1183	Scaff.206: 19273-20455	316	5.98	33.7282	MFSVSKNLFHAVVAATATIHSVFASPLLEKSIINGVESQPGQFPYFVYFGEGCIGSSHGGPNSPPAGCSGSLIAPDIVLTAGHGGNLTNVLISVGATKQHMSDDSGAQIRTCEEWVRHPGFGDFNNDFALCKLNETAIIDESFVRLELNDDASSPPDGTDLIAMGLGVIDNDLNFAKVLRNVTIPTRSLETCQNVYEKYIEILPETMLCLEYNTGTNMATCFADNGAPVVKRVYQGDGSFVDIHYGLASLGLHSDVSVCSDDILARTSGAIDWIKSTSCDTLNSVGSFCKKKTPKKTKAPKHTKASKRTKAPKRS
PmTryp15	PSNMU_V1.4_AUG-EV-PASAV3_0069610	1395	Scaff.258: 27466-28860	415	4.71	45.7114	MLLKRSILSALLIGAATTSSTFAVPDASSSRTIVNGEESTPGDYPYFVHMGGCGAALVAPDIILTAAHCGDLSGKEVFIGAYEVNSLAEGAQKRYCEQYIVDPLYIPSWYPLMDDPMEGLNNDFAICKLNEPVTIDQSFVMLELNEDDAFPAEGTDLLAMGLGSIFSGGMTPQYLRNVTVQAMSDEDCGYPDSYLTEDVLCAGDLVNRRDTCQGDSGGPLVKRTYRGDGTFVDTHVGVVSYGLGCAHPEYGGLYARTSRRADWIKSTSCLVLNSVASFCDGIQKKPDPSSDTGHHLKIEMIADDFDQWSLQDSNGQFVRIRRYSTEEQEIKVEQLYLNPDECYTWRLMHNYIEEISEYVFYLNGEEIIRNLPNKLSTKTETFCTGPLPEQEKTQAPTKT…
PmTryp16	PSNMU_V1.4_AUG-EV-PASAV3_0069620	1455	Scaff.258: 28936-30390	328	4.47	34.7552	MLLKRSILSALLIGAATTSSTFAAPDASSSRTIVNGEQSTPGDYPYFVNFGDVHRCGAALVAPDIILTAAHCGELTGKQVFVGAYEIGTYAEGAQERYCEHYISDPFYAKPFNYHENGGPNADFAICKLNEPVTIDQSFVTLELNEDDAFPADGTDLLVMGTGTLSSGGDIPQYLQNVTVQAIDNDDCEEYYDEGQLTEDTMCAGTERLDKDSCQGDSGGPLVKRTYRGDGTFVDTHVGVVSFGYGCGDEHPGVYARTSRRASWIKSTSCLVLNSVASFCDDIKEKPDPSSGTGHHLSIEISGNIDGVGVGTPMGNSSRSASTANRA
PmTryp17	PSNMU_V1.4_AUG-EV-PASAV3_0078030	2714	Scaff.313: 197162-199875	713	4.82	75.0372	MPTPPRRQAMKTTLVLGLLALSSIVLCAETVAGSKRQQQRLRRGKGHRALLNENNDRTDSGTPATIPSKSMARRRTEATTSFTEWIESSHTFLTRVVDGSSSDQASIRYPWFARLGNSTDSGYSCGGALIARDLLLTSAGCGVPTEAYIGFAVQIESVANHPDGYDLMIVKVKASTPSAADPVRLNFDESYPSIDGEPLTVLGFGSSQSAAMELARNHLKAATISYVPPSACKGKDAADHGFCTTSLEGGESDACLGVSGGPIAKSGFFAATGASKTTTAGGDWSTDDLLLAVVSGAPGECGNQNNHRQSVSSHKEWIVDTGCSLSDDPPPEWNCSEQKEAGTAPLDNSVYYSGSSTEMTELPTSSPPSPYPTTAPTSFPSPRPTPMPTTEKPNPFPIP…
PmTryp18	PSNMU_V1.4_AUG-EV-PASAV3_0083640	2780	Scaff.353: 29536-32315	219	5.59	24.5226	MEHSVKENTSHGLKKFIINGQNSDFGRYPYHALLMHETGKGYCGGTLIAPDVILTAAHCEIPVWVGVGRHFRHTYSDGDELHRILYSYRHPYFFQQTFDFDLILLKLRDTSAKPPIRLNDDPKLPDVSQGSAQNVVTVAGFGKTHHGYAADTIQEVNLNMISNDVCEESRDPYSNVLDFQIGYEGLIFDNMFCLADLSESGKDACSGKLFDVMVEKKN
PmTryp19	PSNMU_V1.4_AUG-EV-PASAV3_0093010	3094	Scaff.441: 3686-6779	561	5.84	61.5232	MKNRKSGVSKAIWGSVLLMAVTATVTNALPEIHTKPQDTTTASGLLYPWLTRDRGDESSPLLVLNEADVRNNDLDDIFISRIVGGDAASVGEYPYFVQPLAVGCGGVLIANEWVLSAAHCGDFSKRFDYNTGREKQMQVVIGNTQRTSINNGVAQVRYCMEYVINPGFEFRGDSIDADNFNAPFHYDYALCKLDVPVYVDDRTVVLKLHTDSSSNAFPGVGSDVTAVGFGTTSMGGDVSQDLLKVTVQVNSNQECATTSVPGATDKIERLTRDIYNENSITEDNICASVRGGGKDSCQGDSGGPLVKKGEVPAGSKLRRIDTHVGVVSFGLGCALDHFPGVYARTSFAIDFINRTVCGQSRSPMCKEWRDGPVVCDPSTEQLLLIQVVTDANPDQTSWS…
PmTryp20	PSNMU_V1.4_AUG-EV-PASAV3_0101390	2194	Scaff.523: 19222-21415	568	4.54	61.8723	MIASCNCVGVYQNGGDKMRRGKGIFSGAFPLASFVLMHLVLLAFISTDVAVFVGGSDINAEGSQPKLDLKVHRNYAKRNLLVNGEPVALSEHPFFLRSWPDSVRLTNDVLCGASLIHSDMIVTAAHCQGAFNYGVMAYNPFSGELDQYKTVDLQIAYPAYYRSDSINYDIMVMRLESPVVDVQPVALNYDPDFPIRRETKKDEVXXPVSLLEGLGLGITETGDVADGLEIGLFSALTNDQCFERFGRNTNAAVTEDILCADPSTDESICLGDSGGPLTARLEVXVTXDGDVIEHSAIGGRSDSDTPWTDSQTADFVVDVPVLVGIISFGNDCQSDMIPDGFARVSYFADWITVQVCKYSRVPPPECSKYRQSEAFQNFQAEQNPNGIIPSGIAKVTLEF…
PmTryp21	PSNMU_V1.4_AUG-EV-PASAV3_0106210	1589	Scaff.564: 83087-84675	508	7.13	54.4645	MNPTSARSANLLVLCLLAQQFLSLLDLVGGFQHINPDFSIRNTRHHLHGSGLHAFKVSVDELEKDLTPSERSITGVVRRCGPSVTYVKSVLPSSPTNGARNFQRRTRNGPRRRRSNQNESPSNNGLPRGTDLGSGSGFIVAPGYICTNFHVIEQAYSIRKNLELAEHTFDEVVGNLTGGFLSHDLLNITKSVVFQGALDKDSLPDVYVRISSSSQYKKCRVVDVNTDIDLAVLRIIDDISEPSKDEEEKSPPSDTTAGVDFIPFGSSMDLLVGQTVVAIGNPFGLQSTVTSGVVSAVNREFRAGTARTPANTPIRNVIQTDAAINPGNSGGPLLNLKGEVVGINTAIITTSGSSAGIGFAVPADQIKPVVKEIIQKDRIQKGQRPNQGWLGLSVVRQDV…
PmTryp22	PSNMU_V1.4_AUG-EV-PASAV3_0109690	2419	Scaff.603: 36906-39324	570	6.05	63.0425	MKGLPFLAYLFSIAINSSSNNGSGDNILGSTYKSNKGNGGFSSSNNDPMSIKGNGVCLVEVARVEWNPIQPWQRSPQSKSSGTAFVIEGEQLLTNAHVVKSAIDIRVRPHGSTRRFPAQVVCYAPDVDLALLELVGESEKADFFGHPSAGEADGDEEEERIAKRRRTTKSLEFATELPGLQETVHVVGFPTGGRTICVTEGVVSRIDLYNRIVAIQVDSAINPGNSGGPAFNSKGQVTGVAFRKRISTKSQKVDNIGYLIPAVLVRAFLGRVDREKGTYQLSGTIPYRCHSLENHSLRLAHGVPDFVHGILITSVADAVTESTEDGTSAEESPLQLQPGDILTKIDDSPVADDGQVVLRGDELIHHAYLMRIKQKDESVIFTVYRGGKHIVCDPYFLKD…
PmTryp23	PSNMU_V1.4_AUG-EV-PASAV3_0112730	1316	Scaff.627: 83706-85021	360	5.8	39.3545	MKMNTLAFFIWLAAVKTSSVFASPRIINGEDSKPGHFPYYVYLPVGCGGTLIAPDIVLSAAHCNKEVNVNMPVAVGSYQRWNPRSQPPPPGSQIRVCEVWIDHPQWDKNTFTYDYALCKLNANATIDESFVKLQLNEDPDAPAVGTDVIAAGLGVIDDRGGPYAPPIFPKTLQNVTFPTRSQEVCKDIHSKGSYPNHVIDPVTTLCADYDINDRKTACNGDSGGPLVQRVGKGDGTFVDIQYGLTSWGAWPFCGDGVFARISGGLDWIKTTACGELNGSGAFCGKSESEPLWVANYDWDCDDPSNKFFCETDPQLYQVQITPPGIDPELWPYEETKAPKKTKAPKRTKAPKRTKAPKRA
PmTryp24	PSNMU_V1.4_AUG-EV-PASAV3_0112740	1845	Scaff.627: 87346-89190	353	6.41	39.0387	MMKMNTLKFFSCLAVAANIPSVFASPRVINGEDSKPGHFPYFVHFTTFTDIVEPKMASCGGTLIAPDLVLSAAHCNYGFHEPDRPWNVGMPVAIGAYGPFVHPNRPPEGSQVRYCAAWIPHPLWDDEKFVYDIALCKLNYPVTIDQSFVTLELNEDPHAPAVGTEVIGVGLGAIHPFDPIFPETLQNVTFPTRSHEVCKEIHSKGPYQKHVIDPELTLCADFDEMNGKTTCRGDSGGPLVKRVGLGDGSFVDIQYGLTSWGWWPQCRDAVFARISGVFDWIKATGCGRLNARGPFCGKPEEISMEFIYEFDCSDSLTSLWCEAFYQPTKSPKKTKAPKRTKAPKQTKAPKRT
PmTryp25	PSNMU_V1.4_AUG-EV-PASAV3_0124650	2046	Scaff.695: 117896-119941	563	9.68	59.8817	MAAXTPALLLLLLFLSGPPFFATDTRGRHRSAWALDSRRWSLRSRVGRGSSHWGCGRHVQSNTIPTETKRRRKTSLPSKRDLFGSSDGGGDEAVGFRNPSKHDKGDPAKRRGGADPHSGVPAEARRRXLVLSSAAALLTTLASSWSGGGKPPSAGASSLAVLEESENRRIEVFERNAPSVVFIDTFSVKQDAFSPNIMEVPLGTGSGFVWDKDGHIVTNYHVVRNAKFAQVALITPRGRKDKKLPGSAISSPSLASSSTGDSSEIDVFGTTNGGLSRTSNTNKVSSDEYKRTVFKAKVVGVDPGKDIAVLKIDAPEDILYPIQQGKSSTLKVGQLGMAIGNPFGLDHTLTAGVISGLGREVKSPIGRPITNVIQTDAAINPGNSGGVLLDSRGMLIGMN…
PmTryp26	PSNMU_V1.4_AUG-EV-PASAV3_0125160	3076	Scaff.699: 155250-158325	847	5.72	92.0549	MPWSLSSSFVARTILSQWIVFWCTSLLYLDPTKCGCSLAYSPSFYSPIRCSRRGAFGGDQIVPSQQRFRKQAHRSRSALLLAANKKTPRDDNESDDQGSSSKRDSSNPKKKNRKNNKSGKKWMFRKRKGNEDDEDDKDCDSDSDWNSNLEGSDQLLNTNPDNKPDRADASSLSDEISSTNASHKDVDDHQTELRSEEQTTHEGQDNSSITPNDQEDDSITIAEDNKVEEQNTRDVTSERGKVDEDPELVTNAETKKKAEIDETERKTSRFGFFGFRERKKKATDVDDKNTTVASIADLDSKNLEKASELIVGFNPPGPPRNATTNADGREDDSVAKKNKKNSGGALGKITRTLTLLLAVMLYPIVADEVGDHIIVSSSSPAVPRTRSLGREQDGEGTPE…
FsTryp1	FisN_11Lh255	1309	Scaff.BDSP01000013.1: 48507-49815	309	4.76	32.1275	MQLLVAFSLISLIIQLVSASVSTSVVGGTPVPAGSFPYYVHLFNPTCGGSLIHPDIVLTAAHCTSFVGRTVSIGAKRLDGNGAESKLVIGTLVHPAFNATGNEENDIRLLRLQNPSSAALVELNTNSLIPALDSKVDVMGFGKTSETGVLSFTLQQVQVTVQDYEVCQTMPNMNILGDRNTQICAGELVGGKDSCDGDSGGPLLVAGTNLQVGIVSVGIGCARVNTSAIYTKVSAYDEFIQNGICELSSFPPARCGPSAAPSWQPSLAPSITSMPSGTPSISSEPTVSASPTISDDDEERCLFRCLCR
FsTryp2	FisN_3Lh287	3461	Scaff.BDSP01000016.1: 19986-23446	627	6.8	68.677	MSTTLFAILSIYFNVVGLIVIEGWSAPIVKKAPSQFIKSRRLNPKSIVRNSKDRNGPGGDDFSDIVNRSLTDFNSSSSVVDAIILNATLGDDLNDEQLRRQTIPSRTDGYDAKSGTHKKPRRLFQRIFFKRENEGDVPVVNTIEEFPARNLPVQSEDKDEGLKIIASETETVLPIPDGSKRAAKKRNRRRLSIFRIIQLSTLAAALYVFVVDDLQSRKEPTRPPMQSATLPLRIGAGQPGSSSRSESDNVADQNAQFDDLPAAQGQRLPLNFVTQAVRKVGPAVVRIDTETNLLQDDDAFNGPVQQGQGSGLIFSKDGFILTNAHVVDDAHKVTVTLTNGRVYEAVVKGSDPIVDIAVLQIVSADKNEELPMAKLGNSDMLNVGQIVVAVGSPGGLDNT…
FsTryp3	FisN_1Lh069	1733	Scaff.BDSP01000042.1: 1873-3605	478	5.5	49.8327	MIVFYFLFLLLGFSSAQSPEKVGDTYSIQFRSSGVSDIEGNETPLGQRFILTHPGATYIALYFSNLALAKGDTIEVSDANGAQAYILIGNGKGEGSPFWSQHIKGDTIVLNMMTTGRSRRSFFEVNQYAAGFESLFETICGVDDKVNAVCYVSSFPTAYGKARAVARLLINGNSLCTGFLVSGSNHLLTNNHCIQNATDALNTDYEFMSEAPFCSSANAQLAYRGTTYDGATFIQTNAALDYTLVQINSGNPSSLYGFLELENQLAATGEQIYIPQHAGGKAKQIAIYSTEPVDATNGFCQINNVGNTGCGGNLGSTNVFYLCDTEGGSSGSPVISMVTNKVVGLHKCGGCTNGNDGTSAHLVWNQVASVLSPVAPVPVPVPAPVPVPVPVPVPVPVPA…
FsTryp4	FisN_1Lh068	2375	Scaff.BDSP01000042.1: 3821-6195	562	5.16	57.8144	MIALYLLLFLFGLSSAQTAEKVGDVFPIQFVSKGTSDVVGTDTPLGKRYVLTHPGATYIALHFSRLALVKGDAIEVSDADGGQAYTLIESGKGKGAAFWSQHIKGDTIVLNIFTSGRNRSFFEIDEYAAGFESFFETICGIDDKANAACYSSSFPNAYSTSRPVARLLINGRNLCTGFLVSGSNHLLTNNHCIQNTTDALNTDYEFMSEAPTCDSLNSQLSYRGTIFDGATFIQTNVALDYTLVQINLGEPATLYGFLELDDQLAAIGGQVYIPQHAMGKAKQLAIFSTEADDAIDGFCHINKSGNYGCGGSASSNVFYLCDTEGGSSGSPVISMVTNKVVGLHKCGGCSSGNHGTSAHIIRNEVASIILPPATPTPANAATPMPVIAPTIGVPPPTAA…
FsTryp5	FisN_1Lh067	1618	Scaff.BDSP01000042.1: 6868-8485	471	6.59	50.2557	MKAIYSSVFLFVHLASTQTLEKVGDVFPIQLRSNGVSDIQGTDSPLGKTYVLTHPGATYIALHFSQLKLRKGDSIEVSDAEGGQAYTLTGSGRGNGAAFWSQHIKGDTIVLNTVIQSRFFWRRKSVFVIDKYAAGFEALTETICGRDNKENAMCYASSFPEEYNKSRAVARLLINGSGLCTGFLVSESGHLLTNRHCIESASDALNTDYEFMSEAPTCDSPNSQLAYKGTIYSGATLISYSSSLDFALVQINNGNPASLFGYLELDDQLAAVGGQIYIPQYPYGWAKQLAIYSSLTVDEIDGFCHINKRGTFDSCSSGSNIDLFYYCDTEGGSSGSPIISRATNKVVGLHKCGGCSSGNHATSAHLIRNRIVPTISPPPAPVPVAPPVETPTTPTAPSP…
FsTryp6	FisN_7Lh172	1924	Scaff.BDSP01000044.1: 394798-396721	428	4.36	44.9928	MRRLIWLSCCPWLGVIASLGAMSKGEPRGLSSTLKIGNDTFAITPRIVGGDFVASADVFPYYVHGVDGDLCGGSLIHPEVVLSAAHCVKAYSTGVILRTLDWMGYDSTSEFYPIEYNFPHPEYTPGPELNDIMLIKLATPVVNAQVVQLDRNGTIPPAGTPATIMGFGLTSEGGNISTELKQATLEIVDQSTCEMLLPGLFVSDIHLCAGYPEGGQDSCGGDSGGPLVDAQDTNLQYGIVSFGIGCARPNLPGVYTRISSYVDWIDEFLCTRTDNPPSDCSQSISESSQIPIDMPSESTALWQATSSPSSTPLTTSFPTSSPSNVPSPFPSQAPSLLPSDQPSFVPSQAPSLAPSAVPSEVPSLVPSALASLAPSLVPTGSPKTKNETKPASPSVVSDL…
FsTryp7	FisN_1Hu063	2694	Scaff.BDSP01000050.1: 47656-50349	338	8.89	36.0026	MKAFCLLFFFFGAACSQVLEQIGDIFPIRFRSNGASDIKGTDTPLGKSYVLTHPGATYIALRFSKLNLLSGDSIEVTDANGGQAYTLTGTGKGKGAAFWSQHIKGDTIVLNTMITSRNWRRSSVFDINQYAAGFEPLTETICGADDKANAACYTSTFPTEYSKSRAVARLLINGNSLCTGFLVSGSNHLLTNNHCIKTAADALNTDYDSGTSSCSGSSSCRGACSRSSPRARACASTCSGSSTCSTSRSGSCSGTGSSTRARAVASKSPCPCGISCPHSNSPGPNSYDSGMFEVERRLLHQFQLLQWCLQNQQTMQVNYLLHKVSLSMLFITKVTIQ
FsTryp8	FisN_1Hu064	2020	Scaff.BDSP01000050.1: 51306-53325	523	6.35	54.2447	MLAFCLLFFLCNLASAQVLEKIGDIFPIQFRSNGVSDIEEKDTPLGKLYIFTHPGATYIALHFAELDLLEGDSIEVTDANGGQAYTLTGKGKGRGAAFWSQHVKGDTIILNTLKMSHNFDKSSLFVVDEYAAGFESLSETICGTDNKENAACYQSSFPTEYNKSRAVARLLINGSNLCTGFLVSGSNHLLTNYHCIKTAADALNTDYEFMSEAPTCISSNSQLSHKGAMFDGAVLIKTSAELDYTLVQLSNGNPSSLYGFLELDEQLAPVGGQVYIPQHPGGKAKQLAIFSSHAADASDGFCHINNVGNTGCGGSFSTNLFYYCDTEGGSSGSPVISRLTNKVVGLHKCGGCTNGNHAASSHVLMKEFGSIIVSPPVPAPVITPAPVEAPNPVATPAPV…
FsTryp9	FisN_1Hh067	1555	Scaff.BDSP01000050.1: 59646-61200	460	7.52	49.0384	MKAIYCLFFLLVHFASSQTLEKVGDVFPIQLRSNGVSDIQGTDSPLGKTYVLTHPGATYIALHFSQLKLRKGDSIEVSDAEGGQAYTLTGSGRGNGAAFWSQHIKGDTIVLNTVIKSRFFLRRRSVFVINEYAAGFEPLTETICGRDNKENAMCYASTFPEEYNKSRAVARLLINGSGLCTGFLVSASGHLLTNRHCIESESDALNTDYEFMSEAPTCDSPNSQLAHKGTIYSGATLIGYSSSLDYALVKISNGNPASLFGYLELDDQLAAVGGQIYIPQHPYGWAKQLAIYSSLAVDEIDGFCHVNKRGTFGSCSSGSNIDLFYYCDTEGGSSGSPIISRATNKVVGLHKCGGCSNGNHATSAHLIRNRIAPHISPPPAPVPVAPPVETPTTPTAPSP…
FsTryp10	FisN_1Hh068	2205	Scaff.BDSP01000050.1: 61756-63960	354	5.1	37.8835	MIALYLLFLLLGLSSAQTAEKVGDVFPIQFASKGTSDIVGTDTPLGKRYVLTHPGATYIALHFSKLALVRGDAIEVSDADGGQAYTLIENGKGKGAAFWSQHIKGDTIILNTFTSGRDRSFFEIDEYAAGFESFFETICGIDDKANAACYSSSFPNAYSTSRPVARLLINGRNLCTGFLVSGANHLLTNNHCIQNTTDALNTDYEFMSEAPTCDSLNSQLSYRGTIFDGATFIQTNVALDYTLVQINLGDPATLYGFLELDDHLAAIGGQVYIPQHAMGKAKQLAIFSTETADAIDGFCHINKSGNYGCGGSASTNVFYLCDTEGGSSGSPVISMATNKVVGLHKLLQWQSRN
FsTryp11	FisN_1Hh069	1945	Scaff.BDSP01000050.1: 64126-66070	446	5.12	46.5527	MIVFYLLFLLLGFSSAQTPAKVGDLYPIQIRSSGVSDIEGVETPLGQTYTLTHPGATYIALHFSNLALAKDDIIEVSDANGDQAYTLTGSGKGGGSPFWSQHIKGDTIVLNMLTRGKSRRSFFEVNEYAAGFESLFETICGLDDKVNAVCYASSFPTAYDKARAVARLLINGNSLCTGFLVSGSNHLLTNNHCIQNATVALNTDYEFMSEAPLCSSANAQLAYPGTFFDGATFIQTSAALDYTLVQINSGNPSSLYGFLELDSQLTVIGEQIYIPQHAGGKAKQIAIYSTEAVDATDGFCQINNVGNTGCGGNLGSTNVFYLCDTEGGSSGSPVISMVTNKVVGLHKCGGCSNGNDGTSAHLVWNQVASILSPVAPVPVPVPAPSPVPVPVPAPLPVPV…
FsTryp12	FisN_13Lh084	2105	Scaff.BDSP01000053.1: 189083-191187	419	8.54	44.2817	MIFIATLAAILLLSHKTLAWTEISTSRRPHSFCRLSSACNGDQEGCDASSNTRRHFLYSLPAVSSLLSVPQSARALSESESKRIAIFEKTAPSVVFLDTFTERRDQFSPNIMEVPLGSGSGFVWDKEGHIVTNYHVVRNALTAQIAILTDAACQQSCKNDVPIPYTSMRGSSSFGNGNIARSVFKAKVVGVDPSKDIAVLKVDAPPELLQPIAVGTSKGLKVGQTALAIGNPFGLDHTLTTGIVSGLGREVRSPIGRPISNVIQTDAAINPGNSGGPLLDSSGKLIGMNTAIYSPSGASSGIGFAIPSDTIKFVVETLIRDGRVVRPIIGISYLESRQARSLGITNGVLILDVPPGSPAAAAGLKGTRRTENGLIEIGDIIIQVGNTKINREADLFEAL…
FsTryp13	FisN_13Lh099	1989	Scaff.BDSP01000053.1: 215104-217092	531	4.39	57.3601	MKHSSLLLFVPFFSLSKLSAAYDPIIATGVLDDGSSTLLKQEESVRSSPIKSEKTNHHHQMVEAYIVGGREAQPGDYPWIIKSVTGFGTCSATLIHSDMALTAAHCQGVFGGGVYVSAFDYNHINDGSIFREVDRHYRNLNYNQNNSIVANDIMLIRLAEPVRDVPLVQLNQDEQVPSDFEELITVGFGFTSLEGNLPTQLLEVEMNSIPSELCFEDLQLFENVQPGPGLLCAGSRTGQASTCNGDSGGPLLTLDGLVQVGVTSFGVNCDTINLPNGFTRVSYYSNWIKETICKYSNDRPSDCPEPEGPDPGAVPINVTIRHDYYPAETTWAIRDRSDNSIKVAGPIGNPTPSSLWYTTIALVPGDYTFEIYDQRGDGMGSLLPENAGFFELSTNVSGA…
FsTryp14	FisN_17Hh147	5365	Scaff.BDSP01000061.1: 276964-282328	1426	6.07	159.419	MLTRKRSLIVGGHDAAQGRYPYFASFDHFGGGVLIAPDIILTAGHVYPPPEQVVRVRLNHTDLTQPEEFETFSIASLHRHPDYFEAAWDAKGNDYNLMKISGFSTTKPVKLNRDPKVPSSGATVTTIGFGSTSPDPATFVESASNILQEVDLEIVSHSACKRSHDRKRNISYAGLFMKESMICTSGGPHNEKDACAFDSGSPILLTPENSDQEEDLVVALVSWGIDCADPFFPAVNARVSFAVDWIDETVCKVSSAHPSQLSDFGCERFHPSRFDWRRFIHHSTCELWQDGQHTTKKAATGPAILLRPIACYKRVSWSRAYDTRQTLHTFLLNSFSTSTLRFDTMPHNKGRNQGKKGNNKKVRSQPANTSAGNERQPSLLQRMKNKLPTFHKRDKIAPD…
FsTryp15	FisN_9Lh015	1817	Scaff.BDSP01000064.1: 24676-26492	497	6.52	50.7955	MTGGFPSGPGAFPFTVHTFDGDQGLCGGVLVHSDVVVTAASCQSVFEATNTTYVGSNDLYGRDFAPLIAISSALPHPDFDEVTYENDIMLLHLETPVGSAVATIAKQIPSDDQLLFALGFGRLNPLDETFPTTRHEVDMPAVSFSACRDVYANAVDSERNVCAGIAGMGPCDGDEGAPLLDAVTTTLQGIWSYSEGCGAAPAVFTRVAYYDSWIREFICNYSQELPDDCSSPGEDDDVPVTDDESTNDDIPVHDDVPVPADDDEPVDDDNIPTSSPTHEVLQPNNGKGKGKGNRSRKSVDSKSHKKNRSDKLSKKSLSSGKGSTGKGSNGTGSTGKGSGKGSLGKGSNGKGSFGKGSSGKGSLGKGAIGNGSIGKGSAGNGSNGKGSTGKGSNGKGSTG…
FsTryp16	FisN_27Lu011	2266	Scaff.BDSP01000069.1: 26246-28511	451	4.6	49.5864	MVVMVDTVTTAVVLIILAVSWVSPAVLASVVVVDPYGCSSGCSLIGPAVEGGDGEIYMNACLATCQGVRFREIDVEWDRHVDSSGSVTEDNMLQFQDEGFRLLSKRRFADIAYGEQQGSFSDKNGVDISDELNETVIGNSEEESGFIGARRISYREGLEYTTQYNTTELIISPRTVYTPSQLRPMLRNVIGEDGRTVIANTTVYPYSIVGQMEFGDGKFCSGTVISRNAILTAAHCVYNLEADDWLQLHRFVPGRFREKDRVEDPFGEWYPTSATAYQAYLRGTSTKYRFNHDYAVVLLAPKEDGCTFIGDVVGFAGLRKTKIGEKGLNDATINGYPEDMEYGSMWSTGNCRGDAFDCLSLDNYACYYCDTAGGLSGAAILDSENYVIGTHTNWFERYG…
FsTryp17	FisN_5Lh196	2288	Scaff.BDSP01000074.1: 183571-185858	379	4.69	40.8095	MKMMMVRYLILIILGFIRRIEGDLEVEPRIIGGITAQPGEFPFFVAGTSNKLCGGTLIWPDIVLTAAHCKRAYQVDVIIGSSDVFGRDGAERILIDFLNAHEDYVPGPESNDIMLVKLQQPSVNPFISLNYDPNSPYDNEMVTTMGFGVTQENGNISSSLQRVDLLVMNTEDCKERLGNVVNLESHICAGIPEGGRDSCDGDSGGPLLPAGSYDTVYGITSFGAGCARPNTPAAYTRVSYYKDWIENFICLNSASPPASCWGENTLSPTPLPTPFPTVTPTKITTPPTVAPTNTPVLTHEPTLFPSISRVPKQTSTTSGEPPKEQPVNAPPTDPKTSQQDGAQTMAPTFFLAGIQISGSYAYSPVAIIWLSYGILLLL
FsTryp18	FisN_5Lh177	2641	Scaff.BDSP01000074.1: 223430-226070	746	4.33	79.1236	MTMASESHPKGFEQYTTMLSLLCISLLLPASASTIRGRRHATANIFDPIAAHIVGGIEVPDGKYPSYGHVVSGQLCGGTLIRPDVLLTAAHCSSAFQSVVFVGSTMISGGPNGEEIGIKQIFPHEEYESGTEQNDIMLVLLDKSSAATLTTLNFNEQLPVEGQDVTVIGFGKTSEDAEASQTLMEVEVQVIGMEECQKLLPTLVEEKMNLCAGVLEGGKDSCSGDSGGPLYDSKSGVQYGVVSFGVGCARENKPGVYTRISNYRDWISARVCEISSNPGEYCELAGKTELDNTDEQPPAADESHSEVTGEGGTNSTVGHGGKPEGVSNGHGKPGTKPGDDPVVEDSGGGGSVSFNNTPNDEIEPDEQSGDEEPDIDNSEEGENNVFNSTIDNGEKPLGG…
FsTryp19	FisN_11Hh255	1234	Scaff.BDSP01000082.1: 122836-124069	309	4.69	32.0424	MQLLVAFSLICLINQLVNASVSTSVVGGTPVPAGSFPYYVHLFNPTCGGSLIHPDVVLTAAHCTSFVGRTVSIGAKRLDGIGAESKLVIATLVHPAFNATGNEENDIRLLKLQNPSSAALVELNTNRLIPALDSKVDVMGFGKTSETGVLSFTLQQVQVTVQDYEVCQTMPNMNIVGDPDTQICAGELAGGKDSCDGDSGGPLIVAGTNLQVGIVSVGIGCARVNTSAIYTKVSAYDEFIQNGICELSSFPPASCGPSATPSRQPSLAPSITSMPSGTPSISSEPTVSASPTISDDDEERCLFRCLCR
FsTryp20	FisN_29Lh018	1857	Scaff.BDSP01000084.1: 21976-23832	294	5.09	30.8958	MTQSTFIFACPRACLPEHRNSFRCHLHKNSRVRSDVSSLIILLLSLSSVHGRIVGGTPATDGEYPYFVHTRGIVCGGTLIHSDIVLTAAHCDEGFAIDKTIYIGAVQLSGEGDESNTVKQLLLHPQYNTNTSDNDIMLIKLASTSSSPVAQWNTKATVPASNSKVNVIGFGATSEGGSVSSTLLEVELTVQSSQTCVETMGANTALQICAGETEGGKDSCQGDSGGPLLVDDTVVGIVSVGAGCARPNTPGINTRVSAYTQFIKDGICTLSSDPPEWCVAAPEECSLFFCCDR
FsTryp21	FisN_29Lh062	1702	Scaff.BDSP01000084.1: 102456-104157	502	6.21	53.4887	MLPLIAPPVVKNRPRSSLRPNVFRRPSVDTAPRAGQTDSVLWFQPDVEPAAGFVLPSIIGGTPVADNLTYPYFVHFPGDDDSTCGGTLIHEDIILTVASCPAAQTANPYIGSVQWKSGSQLIVTQRLSHPEFNEISRANDIMLVKIDAPRTEPTVTIATTSRPAVNEPLRVMGFGLFNNTEFSALLLEAEINVLDFDECIDVYSERLDSNSQICAGSVTAAIGSCFDDEGGPLIHATEDIQYGIFSFTESCMSIAPQIYTDVTKYSDFIEAGICELSSNPPSSCSTTAPNQSLAPSVAPLDLPGATSSPTPPSPVESTTNTPISPIAAPLAPPTNPPFAPIAPSVTPPNDTVPSVTPPNDTAPSLTPPNDPPVTSPLQPPVQPSSKASTKMSRRYSSSA…
FsTryp22	FisN_12Lh364	5784	Scaff.BDSP01000087.1: 26116-31899	1707	6.02	190.305	MSKPRPIPLTRPLRSTPDEAEPSFSFEEESYLSNRAVDFEDDFHRRLTGTRREESGGSSFWRASSVNSVAATPSFNSVHLRGKSDVNVKERKANVIPAPPTPQPVARMSSAESLTGNSNWPDRRDSSLSANSSTSQKHKKDVTRQRAADRRLKLDAQGSTLDAGHIIDNDASFSFQLPNFAQMVHATSLDRSSSDQSTGSLLYGKSPGGTFIGKSSSLIFPTGLNTNGDNDNEAAKAKRRRINLALDQCEAVRFPFKKKLILTNLDLSAADIPLKDLCGTSLGNTLYKLSLSGNRLGTVPARLVQNLPVLKHLDLSQCELSQLPEKWNLPKLSQLNLSHNGFTEFPDEMILAGLPELQELNMYANKVSEIIIPANPKLLSKLEKLDLGYNDLVSIPPEL…
FsTryp23	FisN_12Lh102	1584	Scaff.BDSP01000087.1: 619770-621353	470	4.8	51.2465	MLIIILFLILSISHAQQNTEKNRELIVGGEETKEGRFSFAEISLQIRRSHQCGGTLIAPDMILTAAHCQSWIDTAHIHRYDFKDKSDVYMEMDPAFIHVHPEFNPSTFQADFSVVGLGRPVPSAQIVRLNTFASVPSANDPVVVIGWGAINVTDPSNTIYPNRLQKAHINYITNEECEKAEVQGQALYTGEIYSDMLCATSPGVDACRGDSGGPLIMEGAVEGEDVQVGIVSWGRGCALFPGVYSRVSDGYAWIRKEVCAYSVDPPAYMRCRDEERDSKFLSPGPLEQSIPSIAPVLQRSSGRVDVEIVIQLDQQSHETSWTLSDNDGNVLVNVPYGAYANLSAQSIDFTVRVDEGSGLLFVIKDEAFNGMSQGVPGWYKVYLLSDLQRVEIISGDGDY…
FsTryp24	FisN_1Hh716	4921	Scaff.BDSP01000089.1: 123065-127985	1553	5.44	171.498	MTTPNRNEQTNTLFPAVSGTEGASADANRNQSLATNAANNNSGLNSHTSSTLLRDWQNMGSLNSQSSEMLRREFDELPPPVVPVVAISDDGRRASSGNYAYPVATFVRDLVRTGIDQFSLAVSSPLVPGEQRRLASAHQDEETFQLSIRSEGDGLRNFEQIRNFHNIHSEPTLATSMRSVQDIGVGGVEYYVVDGDLVELPRHEHHPGDIIQERLREAQQRKCQTATQAPNRVKKGVRRLSKFLKRGVRGSSRNESGGSTEVMEPEPSALSDEAPVQTVSPTEANLPLPASPNRKENKQQKKRGKKKSIFSWGRSDDTASTSNHSDDQQFRRSQQSEPEDFIPPANQFNAVTGLESSFGPSNRTGYFSAARYEDPLSPPTAALSAASLNDHPLLSVAAS…
FsTryp25	FisN_3Hu290	2989	Scaff.BDSP01000102.1: 269341-272329	331	5.07	34.9416	MRLDCVTETVCKVGPAVVRIDTVTNSSRESEASRRATINMITNPSKENEESNSGSGDDIGSGFIFSKEGLILTNAHVVEDAAEINVILIDGREYKAVVKGIDSVVDIAVLEIVPTDESDGFPVADLIDSDVLNVGQIVVAIGTPRGLDNTVTLGIVSGVARRLMVANKGSYRKVDYIQTSVALNPGNSGGPLVDVETGDVIGINTGAADNMEATTFSIPINRVRHIINKLGRGRNVKHGYLGISAAPCTPDVARELNAVSTLDYFIPEIHGIVIYFVHPSTPAETAGLRPGDVIVKVAGKDVESYDAVRHLIDRAAVGKVRLRLDTGSGS
FsTryp26	FisN_3Hu289	2001	Scaff.BDSP01000102.1: 272379-274379	345	5.05	36.6315	MLTFFTSNALKAPEGRQSLSTVAGSKHATELKNETSPASRELRLDFVTETVRKVGPAVVRIIAETKPSKGIEGPSDEVRQNFGSGFIFSEDGLILTKAHGMEEADKITVSLPDGREYEAIVKGIDPIVDIAVLKIVSANESNEFPVAKLVDSDVLNVGQIVVAIGNPAEFDNTVTMGIVSGLGRSSTTISGPHIKVDYIQTDVAMNSGSSGGPLIDVETGDVVGINAGSVDSMAGTTFSIPINRIRHIIDSLSQGREVQHGYLGLSVMKCTPAWARQINAKLIDSSSYRAPEIHGVFVQTVHPFTPAEKGELRLGDVIIEVGGEGVQVPDDLRRFIDRAAVGEV
FsTryp27	FisN_3Hu288	1489	Scaff.BDSP01000102.1: 274431-275919	354	5.21	38.0331	MTLNSVAEAARKVGPAVVRIEIELNLPANHDAFSKEGQPGVGSGFIFSKDGLVLTNAHVIEYAREIKVNLMDGREYKAVVKGKDSFVDVAVLQIVSSDKSDEFPVAKLSDSDGLTIGQSVIAIGSPNGLDNSVTKGIIANAGRSWADIKSFVRKAYRTADYIQTDVALYTGNSGGPLVDVETGDVIGINANTLSTMPGTTFSIQINRIRDIIDALSQGREVQHAYLGVSVVKCTPPWAAQMNVKAAGAYTLPESHGALVWFVHPSTPAAEAGLRGGDVILKVGGKAVESPGDVRRFTDRAAVGETLTLFVYRDSQEIEISVQPMDLVTRLREARDEENRMLEAIERLKDDMQF
FsTryp28	FisN_3Hh287	3259	Scaff.BDSP01000102.1: 275971-279229	674	6.2	74.6071	MTDDIFFELRARLLLLLSSALFFVGLFDRSVLVMTLNTDSITNQNMPKTLFAILFIYCSVEGLTVIELWSAPIVKRSPSQFIHSRRLNPKLIMKLSKDRDEPDGGDFSDIVNHTLTDFNSSSSVVNAIILNATLGVDLNDEQLRLQTLPNRTDEYDAKSETNRKKPRGLFQRIFFKREKKDDVPAVNTIETFPALSPPVKIENKEEETKIAASETETILPIPDDSKRAPKKRNRRMPSFFRIVQLCTLAAALYVFVLDDLQSRKELIRPPVQRGTLPSRNDDRQPGSSSHQLKAESDAERDSQINNLPATQGQRLPLNFVTQAVRKVGPAVVRIDTETNLLQEDDAFNGPVQQGQGSGLIFSKDGFILTNAHVVDDAHKVTVTLTNGRVYEAVVKGSDP…
FsTryp29	FisN_5Hh177	5230	Scaff.BDSP01000111.1: 35866-41095	629	4.28	66.5533	MESTRVMGMLLASDVFVGSTMISGGPNGEEIGIKQIFPHEEYEPGTEQNDIMLVLLDKRSAAPLTTLNFNEQLPAEGVDVTVVGFGKTSEDAEVSPALMEVEVQVIGMEECQKLLPTLVDEKMNLCAGVLAGGKDSCSGDSGGPLYDSKTGVQYGVVSFGVGCARENKPGVYTRISNYRDWISALVCDISSDPGEYCELAGKTELDNTDEQPPAADESNSETEVSNSTVGHGGKPEGVGNGNGKPGIKPGDDPVVEGSGSGGSVPFNITPDDEMEGPGNEEPDSDDGDKNVFNSTIDNGKKPEDGGYGKPGNNSHGVEDTGDSDPTNHNSTMDDGGKPDGIDQGKPDDKPEKDFENSADGDTVDFNFTLGEGGKPDGVGNGKPGSKPVDKEEIEGSDDV…
FsTryp30	FisN_5Hh196	1533	Scaff.BDSP01000111.1: 82383-83915	378	4.52	40.6722	MKRMTMRYLILILGFIRRIEGDLEVEPRIIGGIAAQPGEFPFFVAGTSNKLCGGTLIWPDIVLTAAHCKRAYQVDVIIGSSDVFGRDGAERIMIDFLKAHEDYVPGPESNDIMLVKLQQPSVNPFISLNFDPNFPYDNEMVTTMGFGVTQESGNISSSLQKVDLFVMNTEDCRERLGNVVDLESHICAGVPEGGRDSCDGDSGGPLLPAGSYDTVYGITSFGAGCARPNTPAAYTRVSYYKDWIESFICLNSASPPASCWGEDTLSPTPIVTPFPTVTPTTITTPPTVAPTSTPVSTQEPTLFPTMSPVPKQTSTTSGEPPKEQPVNAPPTDPKTSQEDGAQTMAPTFFLAGIQISGSYAYSPLAIIWLSYGILFLL
FsTryp31	FisN_10Lh214	1787	Scaff.BDSP01000114.1: 437180-438966	468	6.48	50.0144	MDASVLSMSKDTQKRAVICVILATLAYGAISGLSSARWSSQNSATDSGVSVRDFNSFRRLKSHFIKSATNDPHREYMSRPVGMDKVVSLEEDFKARIVGGLPSPQGAFPFYVHSTGSALCGGTLIHEDIVLTAAHCFDTFTEDVIIGSNDIFGRDGAERIPVEMTLPHPLYSNQTEQNDIMLLKLRSSSNSSLVTLNLNPVEPADDEEVTVLGFGYTAEPETEGAAVSIELQEVNINIIDFETCDALLGVPIFADSQICAGNMDGGRDSCAGDSGGPLLSLDGQQYGVVSYGIGCGQPNRPAVYTRLSAFADWIREGICSLSENPPSDCPERPPVDSPVEPETLPTAAPTVVNSTTSSPTLAPLPVIAAPVQRPTPRPLISIPHNELFVVSNGKEKGFS…
FsTryp32	FisN_10Hh214	1775	Scaff.BDSP01000131.1: 214803-216577	468	6.05	49.8522	MDASALSSAKDTQKRAVIYVILASLAYSAISGLSYARSSSQNSATDSGISLGDFNSFRKLKYQLIKSAANDPHREYMPRPDGMDKIVILEEDIKTRIVGGLPSPQGAFPFYVHSTGSALCGGTLIHEDIVLTAAHCFDTFVEDVIIGSNDIFGRDGAERIPVEITLPHPLYSNQTEQNDIMLLKLRSSSNSSLVTLNLNPVEPTDDEEVTVIGFGYTSEPETEDAAVSIELQEVNINIIDFETCDALLGVPIFADSQICAGNLDGGRDSCAGDSGGPLLSLDGQQYGVVSYGIGCGQPNRPAVYTRLSAFADWIREGICSLSENPPPDCPERPPVDSPVEPETLPTAAPTVVNSTTSSPTLAPLSATTAPVQRPTPRPLITIPHNDLFVLSNGKEKGFS…
FsTryp33	FisN_26Hh008	3239	Scaff.BDSP01000132.1: 20267-23505	486	6.55	50.2701	MISLLVSSCLCMSAWASSAYVKLDNDVFTEKAPKRPITNNVFKMSEDSMVTSTLQNVVGGAPSASGDFPYNVLFSSPTAVCAGVLIHPDIILTTVSCTAAETSDARIGGINTETGVVISVAETVEHPDYDAATAENDLRIVRLSTTTNITPVPLATTVPAVASSVTAIGFGVTAEDGTASTTLRDVDITVLDFINCENFLDATVFPASQICAGNLADGRGHCDQDEGGALLAGSTLVGLFSFNEACGEADEPSVYTNIVAYLDFIEATICDISTVPPEDCESAAPTVSPAPSVSSAPSSPPTSSVVPTVAPQVTTSPQPTTTSQPSGESGPSLVPTSMMISETPGVTTEPTITVAPTLTPSTHPPSDSSGKGKGKGKGKKGKKGKKSKKGKGSSSYSGK…
FsTryp34	FisN_4Lh079	1909	Scaff.BDSP01000136.1: 370884-372792	531	8.59	56.8746	MIRSALLLLAALLRPCPASRRLQPLARGGDGQESAEDIRVSYLESNGSNSNTTTSLYQNTSIVREGTVKAQSTKYDESFADDNVLERAEPTVTPNGGGATIRRSGNATFDGKSIVNNTEQIVGGTATAFGSFPFFVHGANPNDDRKICGGVLVHPDIFLTAASCRTLFFEDSEVFIGATNLLSTLGFAESRKILEKKAHPDYDFVSRANDLMLIKLDSASTQTPADFNRVADFPVTGESLVVVGFGWTNVAEEVLSQSLQQATITVADFARCEATNNAAVSAETQICAGQPTGGPDSCDFDTGGPVLTQDGGFLHGINSFAVGCGFPDSEGVYTRVSAFQAFIEDGICELSTDPPAFCLEDPTTTPTVVGNIPAPALTPAPTLAAPQSGQTVSPFSPLS…
FsTryp35	FisN_9Hu005	1345	Scaff.BDSP01000147.1: 10276-11620	374	8.28	40.6738	MNVIAALMLPSLAVASNIFAHNEIQPRIVGGFPGGIGAYPYFCHAITNSSVCGGTLIAADVVLTVKSCENVFDNNEVFIGSNDRLGRDFAPRISVSSLQMHPTEDLMLVLLNESSNNTLVSLNLEGTLVADLPLFTIGFGKSTEEESAYSDSLMEVDMFLLENGICRLQVGDLFNETTQYCASFPFGGPCDGDEGGPLLDQITQEQSGVYSYNIGCTNQPSVYIRLSTYADWITDFVCSNSTQAPEVLCGVMGGNKGKKSKKGKKSKSSSKSKKSASGKSSKKGKGGKGKGSEDVEMEDYFYMNSTHHFLNETHFHNATVHDRGSSSKKSFKKGEQHGVVHSPATRTTHQQRTRRKRRQIQYPRIRGGRQPLP
FsTryp36	FisN_9Hh015	3254	Scaff.BDSP01000147.1: 29752-33005	568	8.98	58.1368	MKRWLLFTSIALVTVHADPDIAIEENENSRNVFRRGIHPRGQIVPRMAGGFPSGPGAFPFTVHTFDGDQGVCGGVLVHSDVVVTAASCQSVFEATNTIYIGSNDLYGRDFAPLLAISSALPHPDFDEVTYENDIMLLHLETPVGSAVASIATTIPSEDQLLFALGFGRLNPLDETYPTTRHEVDMPAVSFSSCRDVYADAVNSERNVCAGIAGMGPCDGDEGAPLLDAVTTTLQGIWSYSEGCGAAPAVFTRVAYYDSWIREFICNNSQEPPDDCSSPGEDDDVPVTDDEPTNDDIPVDDDVPVPADDDVPVDDDNIPTPSPTHEEMHPTNGKGKGKGKRSRKSVDSTSHKMNRSNKLSKKSSSLGKGSTGKGSGKGSMGKGSSGKGSLGKGSNGKGSN…
FsTryp37	FisN_24Hu261	2981	Scaff.BDSP01000149.1: 3185-6165	442	4.74	48.7516	MVDTVVVVLIMAASWVSPAYLAAAAVDPYECSYGCSLVGPAVEGGDGEIYMNACLATCQGVTFREIDVEWDRHVDCSGSVTEEEMLQFQDEGFRLVAKRRSADIAYGKQQGTFSDKNGVNISDEFNETMLGNSEEAFIGARRFSYSKGLEYATRYNTTELVLSPRTVYTPSQLRPMLRNVIGEDGRTAIANTTVYPYSVVGQMEFGDGKFCSGTVISRNAVLTAAHCVYDLEADDWLQLHRFVPGRFRENDVIKDPFGEWYPTSTTLYQAYLRGTSTKHRFNHDYAVVLLAPRDDGCTFIGDVVGFAGLRKTKIGEKSLNDATINGYPEDMEYGSMWTTGVCHGEAFDCLSLDNYACYYCDTAGGLSGAAILDSENYVIGIHTNWFERYGEPLYNGGTI…
FsTryp38	FisN_7Hh172	2839	Scaff.BDSP01000152.1: 419291-422129	423	4.68	44.7426	MRRLIWLSYCPWVIASLGAIGEPRGLSSTLKIGNDTFAITPRIVGGDFVSSADVFPYYVHGVDGDLCGGSLIHPEVVLSAAHCVKAYSTGVILRTLDWMGYDSTSEFYPIEYNFPHPEYTPGPELNDIMLIKLATPVVNAQVVQLHRNGTIPPAGTPATIMGFGLTSEGGNISTELKQATLEIVEQSTCEMLLPGLFVSDIHLCAGYPEGGQDSCGGDSGGPLVDAQDTNLQYGIVSFGIGCARPNLPGVYTRISSYIDWIDEFLCTRTDNPPANCSQNISESSQIPIDMPSESTALWQATSSPSSTPVTTSPTSSPSIVPSRFPSQAPSSTPSDQPSVVPSQAPSLAPSAVPSEFPSLVPSALASLAPSLVPTGSPKTKNETKPASPSVVSDLLNEFP…
FsTryp39	FisN_29Hh018	1750	Scaff.BDSP01000170.1: 32246-33995	267	4.39	27.9083	MRNSFVRSGLSSLIISLSLSSVQGRIVGGAPATDGEYPFYVHTRGTICGGTLIHSDIVLTAAHCDEAFAIDQTVYIGAIELSGEGDETNTVQQQLLHPLYDTNTYENDIMLIKLTSASSSPVAQWNTKASVPASNSKVDVIGFGATSEGGDVSSILLEVALTVQSAQTCVETMGADPVTQICAGELTGGKDSCQGDSGGPLLVGDTVVAIVSVGVGCARPNYPGINTRVSAYTQFIKEGICNMSSDPPEWCFTTTDECSRIFCCDR
FsTryp40	FisN_29Hh062	1665	Scaff.BDSP01000170.1: 119976-121640	501	6.72	53.6962	MLPLITPPVIKNRPRSSLRPNVFRRPSVNTAPRAGQTDSVFRFQPDVEPAAGFVLPNIIGGTPVADNLTYPYFVHFPGDDDSTCGGTLIHDDIILTVASCPAAQTANPYIGSVQWKSGTQLIATERLQHPEFNEISRANDIMLVKIDAPRTEPTVTIATTSRPAVNEPLRVMGFGLFNDTEFSALLLEAQINVLDFDECINVYSERLDSNSQICAGSVTAAIGSCFDDEGGPLIHATEDIQYGIFSFTESCMSIAPQIYTDVTKYTEFIEAGICELSSNPPSSCGTTAPNQSLAPSVAPIDLPVATSSPIPLSPVESTTNAPISPIAAPLAPPNDPPNAPIAPVAPSLTPPNGTVPSVTPPHDTAPSLTPPDDPPAASPLQPAIQPSFRSPRRFSSAKK…
FsTryp41	FisN_12Hh364	5889	Scaff.BDSP01000203.1: 513626-519514	1709	6.08	190.801	MSKPRPIPLTRPLRSTPDEAEPSFSFEEESYLSNRAVDYEDDFHRRLTTSGTRREESGGSSFWRASSVNNVAATPSFNSVHLRGKSDMNVKERKPNVIPAPATPQPVARMSSAESLTSSSNWPDRRDSSLSANSSTSHKHKKDVTRQRAADRRLKLDAQGSTLDAGHIVDNDASFSFQLPNFAQMVHATSLDRSSSDQSTGSLLYGKSPSGSLIGKSSSLIFPTGLNTNGDNDNEAAKAKRRRINLALDQCEAVRFPFKKKLILTNLDLSAADIPLKDLCGTSLGNTLYKLSLSGNRLGTVPARLVQNLPVLKHLDLSQCELSQLPEKWNLPKLSQLNLSHNGFTEFPDEMMLAGLPELQELNMYANKVAEIIIPANPKLLSKLEKLDLGYNDLVSIPP…
FsTryp42	FisN_26Lh008	1568	Scaff.BDSP01000205.1: 18478-20045	484	7.97	49.9929	MLSLLSLVSSCLWMAQPSWASSAYVKLDNDVFTEKGSPKRPITNNVFKMPENSMVTSTLQNVVGGAPSASGDFPYNVLFSSPSGVCAGVLIHPDIILTTVSCSAAQTSDARIGGINTETGVVISVAETVEHPDYDAASSENDLRIVRLSTTTNITPVPLATTVPAVASSVTAIGFGVTAEDGTASTTLQDVDITVLDFINCENFLDATVFPASQICAGNLADGRGHCDQDEGGALLAGSTLVGLFSFNEACGEADEPSVYTNIVAYLDFIEAAICDISTVPPEDCESAAPTVSPVPSVSPAPSSSPTSSVAPTAAPTLSPQPTTTARPSGESGPSLVPTSMMISESPGVTAEPTVTVAPTLTPSTHAPSERRKRSGKGKGKKGKKGKKGKKGKGKGSYS…
FsTryp43	FisN_9Hh364	2088	Scaff.BDSP01000206.1: 117078-119165	511	4.96	55.8687	MTWYSFLSISIAIIAVSLLAPSSLTVVVSAQEVQQPTYDCRTGCSLDANINGPPVCGIDQLTYLNECLAVCQNVAIVHYGPCNQDGSISESELSTDSEVVTMELMTRFISRGYRFVSKNTRFLSQPENIEESVVVSAAESASVGAVEDIEPYFVLFTPDGYEYAYRATDSLPSYPGPTPLYMGMQQLRERNLAIIGADTRTAITNTRAYPYRTIGEADFGTLEGGCTLTMISRNAAITAGHCVYNFQNKVPIQMKRIAPGRYRDSSGNTVEPFGTWEVETMQTFGQFKAQGNMTFDLAVVTFAPETRDNMQNCPYVYPGDVVGFLSLDRAQTSGGRVSDSRLASSTITGYPADFPNGVMATSGTCSKGRSYFRGRVRLALTVIPISSFFAFSQAWHSDH…
FsTryp44	FisN_9Hh366	1569	Scaff.BDSP01000206.1: 122497-124065	339	5.13	37.3829	MLTGRRNLDDLALPENNPTFHLEERKDDSILEQQPLLWSRFTSDGYVYTAVVTDEDNRRFLQELQNIYESRSNRSLIVIGPDTRKVVTDNQDRLPYSPIVELDYGFGNSEGGCTGTLIGKSSVLTAAHCLYNFVEKQFTNPLRMAPGRYRQGTNTIEPHGLFGFRYSTFFTTYQSTGDARYDMGVATYNANSQGKFPGQLAGTLCLAEAATQKLTAETILAGYPMDFLDGNLAESRGCKWSLETGIISHDCDTTGGQSGAPIVSSMSEMLGIHIGYNPNTFINIALGWNNATYSSVYAWAPDARSCPDRRFCSNCPALEGPLRRTLCSLVCLLFGNAE
FsTryp45	FisN_9Hh367	3025	Scaff.BDSP01000206.1: 124366-127390	677	5.81	72.6269	MKEALLHLVALASVLSIVASQTTYDCNVGCSLDASLMGPPVCGDDNLTYLNECLAVCQNITVASLGVCEGEDPFQESFVSSDPQVIPMSTMTRFSDYRFVGKRLPSTNFEEDIRYLLEEQMINETDDGFLEEMDDQFIPNYRFTPEGYEYRTTLMFEEESLLQPVAPQLGLLGENGLDDDGEGNATRRELVLIGQDSRVPVADTTRYPFRTIANADYWWGEGGCTLTLISRTSALTAGHCVWNTNRKGPMNMTAIAPARFRDATKRDGTAEPFGTWEVDYVSLFGNFQQLGQTNFDIAVVTYKPRIRNNLSTCKELYPGDALGHIGLDRPAEVDGRVVDSRLNTMVITGYPYDYNRQMATSGPCDRAPESRRANYINHYCDTVGGNSGSSVIVEGNIAL…
FsTryp46	FisN_9Hh368	1965	Scaff.BDSP01000206.1: 127756-129720	466	5.33	50.6399	MRKTLVLILSSFTCVASQYDCNVGCSLDGSIMGPSVCDDEGFTYQNACVAWCQGVTKFNYGSCDGMNESRLSGFDFPGSADVITMDVMNRFAHESFRFVTKRVKFATQLDDYEDVVESDLVDRLGVPLRSHFLRITSEGYEFMAPLESTQSTGTPGSSAANEGLAGQVDRKLLRDRNLIVIGTDTRSIVPDTTAFPFRAIGSADYNYTKGTSICTVTMISRTSALTAGHCVWRTSTNEPLPMMKVAPGRYVDASTGSMIDPYGTWDVDYTTTFQNYKEKDEQFDMAVVTFKPSNRPDLGCSNVYPGDVVGFVGIDRVLGTSSAVNDPRLASLTVTGYPNDYFGKMVTSNACSREALSGGSHYIWHFCDTVAGMSGSSFLLPNNVAVGVHAHGNWVSSRN…
FsTryp47	FisN_9Hh369	3388	Scaff.BDSP01000206.1: 129796-133183	482	8.44	53.1682	MFFSVASEGAVISKRRLRFRKPRSSNRMRNMWNALLLLLLAIARAAAQYNCDAGCSLDPTVMGQPVCGADGISYANGCLALCQGIKFTAGSCGGEGDRVEQMDLTGQTEVITREIMSRFAKESFRFVTKEIDFSRNPIRDFVHNSNVFSSSLSPDGFDTVRVTSEGYKFISQVKSFAKIQGPTPSYEGRIAENQPGLRKRKLVVVGEDTRTMVPDSTIFPYRTMGGLDFDFSESGCTITMISPTSGITAAHCLYDRAAKKPYDVIRFAPGRYYNPEQSDNTTEPFGTWDVDYTNYFKGYEESGDEIYDMGVVTFKKRRRRFLGIFSVYPGDFVGYLSIDRVGEDNANVTDARFSTMTITGYPYDMKHKMITTGLCSTAPFSTKPKYIYHTCDTTPGMSG…
FsTryp48	FisN_9Hh370	2575	Scaff.BDSP01000206.1: 133366-135940	468	5.66	51.2066	MLKLSNIIASYLIVASCFASVAAQYNCDAGCSLDTAIMGGPVCGEDLLTYVNGCVASCQGIKKFTSGPCSGDADRLTMPDFSGNAEVITRAIMNRFAKENFRFVTKEIEFSTEPIIEEGSEEDESNIFSPLQVPATEILVRLTHEGYKFISKASTPTKVTSTQPYQGIAQETSTNLRHRALDVIGDDTRSVITNTTVFPYRTIGALDLIQPSSCTGTMISRRSALTAGHCTYNYSTRSWRPMTRIAPARYIDPTQADNTAEPFGTWDVDYVTVKQEYIDGRTRTADLAVVTFKPRTDTRYTCRDNTQVYPGDIVGYLGIDLVAGTDTSVTDTRLQTMTLTGYPYDFNQQMVTSGLCSAPPQSYGPNYILHYCDTEGGSSGSAVLSTQNQILGVHNMGFG…
FsTryp49	FisN_9Hh371	1705	Scaff.BDSP01000206.1: 136196-137900	463	4.79	50.8069	MIRIGSLLAASFTLARADYNCSAGCSLDALVMGPAVCGSDGLTYANECLAWCQGIELDSLGPCESLLEESAFVMNSEVIDEATITRFADEEFRFVTKRTRYAKKIENLENMSAFDDEYEVEETGIDRHYVRITSDGYEYASRYSLLNETLGPTTLYKGLADGYEFIVKNRNLIIIGNDTRSAVPDTTLYPFRAIGASDYRWGNNSCTATMISRTSALTAAHCVWNYNEGRPMPITRIAPGRYFDSESNQHLEPFGMWEVDYATAFGEYRETRNRYFDMAVVTYKPISRPDLGCDEVYPGDIVGYVAIDSIVSSSNGVIDPRIADITITGYPYDFRRGEMTTSGPCSPPARSNGAHYLRYYCDTAGGMSGSALLTKENIALGNHAGGSGGANVGPVMSKD…
FsTryp50	FisN_4Hh079	2345	Scaff.BDSP01000211.1: 44016-46360	531	7.04	56.8502	MRSSTLLLLAALLRACLASRKLQPLTRGWDGDEGSEENITYSDLESNGNSSNTTNSLYHNSSIVQEGTVEVKSTKYEESFPGHDVLARAEPTVTTNGGGATIRRSGNATFDGKSNINNTEQIVGGTATAFGSFPFFVHGSNPNDDTKICGGVLVHPDIFLTAASCRTLFFEDSEVFIGATNLLSTLGFAESRKIVEKKAHPDYDFVSRANDLMLIKLDSASTQTPADFNRVADFPATGENLVVVGFGWTNVDEEVLSPSLQQATITVADFARCEATNNAAVSTETQICAGQATGGPDSCDFDTGGPLLTQDGGFLYGINSFAVGCGFPDSEGVYTRVSAFQAFIEDGICELSVDPPAFCLEDPTTTPAPTVTGNIPVPSLTPAPTLQPGQTISPASSLS…
FsTryp51	FisN_1Lh716	4885	Scaff.BDSP01000246.1: 16596-21480	1552	5.44	171.625	MATPNRNEQANALYPAVSGTEGASADTNRNPSHAMNFENNNNSSLNSHTSSALLRDWQNMGSLNSQSSEMLRREFDELPPPVVPVVAISDDGRRVSSGNYAYPVATFVRDLVRTGIDQFSLAVSSPLLPNEHRRLASAHQDEDTIPLSIRSEGDGLRSFEQMRNFHNIHSEPTLATSTRNVQDIGVGGVEYCVVDGDLVELPRHEHHPSDIIQDRIREAQQRKCQTVTQAPNRVKKGVRRLSKFLKRGARGSSRNESGGSTEVMEQEPFALSDEPPVPTGSLTEANLSLPSSPNRKENKQQKKRGKKKSIFSWGRSDDTASTSNHSDDQLFRRSQQSEPEDFIAPANQFNAITGLESSFGPLNRTGYYSAARYEDPLSPPTAALSAASLNDRPLLSEAA…
FsTryp52	FisN_23Lh006	1663	Scaff.BDSP01000247.1: 14826-16488	363	4.45	40.4169	MQFSLSLSEELLDVERRSLIVNGADADPTQFPYFCTLEDYCGGVLIAPDIILTAGHCKGEHMHRVHPHVGAYSYDDYQESFRLQHAFRHPLFDRNDDFEDMVYDFTIIKLQGSSKMPYLALNRNPRFPSEHQDVVVLGLGVLGDDTDERPDVLQQVTLQTILNAACNASSNGETSYEGRIHETNLCTHTPLKDACDYDSGGPIIATDEHGKEVLVGLVSWGVGCADPDLPAINARVSAVADWIDATVCELSDDPPKGFGCFPEIVEDDHRGRFWSLVAGLVCILALFLMHGKQRCQQIYDLLYGDLFDDDESDENEETEFVGGKAFFPLVKHDSEYTTLTVEYCSSSDEDSPARRNYRSISP
FsTryp53	FisN_9Lh364	2045	Scaff.BDSP01000252.1: 641640-643684	485	4.63	53.1635	MTCCSFISISIAIISASLFAPSCLVVVVTAQEVQQPTYDCRTGCSLDANINGPPVCGIDQLTYLNECLAVCQNVAIVHYGPCDQDGSLSESELSTDSEVVTMELMTRFISRGYRFVSKNTRFLSQPENTEESVVVNEAESATVRVVEDIEPYFVLFTPDGYEYAYRTTDSLPSYPGPTPLYMGMQQLRRRYLAIIGADTRTAISNTQAYPYRTIGEADFGTLEGGCTLTMISRNAAITAGHCVYNYQNKVPIQMKRIAPGRYRDSSGNTVEPFGTWEVETMQTFGQFKSTGNMTFDMAVVTFQPETRDNMQNCPYVYPGDVVGFLSLDRAQTSGGRISDSRLASSTITGYPADFPNGVMATSGTCSKAWHSNHEQFAYHYCDTFGGNSGSAVITSGNVV…
FsTryp54	FisN_9Lh366	3519	Scaff.BDSP01000252.1: 644226-647744	445	5.2	49.001	MPSRTFLSLYSHSILLLILSLTLSSSQSSSSYDCENEGCSWETVPPVCGVNGVTYANECLAYCQNIEIAFIGPCSESGSIASTPYDDGINATISIMQRFQKENFMLTERRNLADLVLPEYNPTFHSEMRKDEIPLEQQPMLWSRFTSDGYVYTAVVTDESNKRFLQELPTNYESHNNRSLIIIGADTRKIVTNNHNRLPYSPIVELDYGFGNSEGGCTGTLIGKSSVLTAAHCLYNFGRKEYTNPLRMAPGRYRQGTSTIEPHGLFGFRYSTIFSVYQTTGDGRYDLGVATYNADSQGRFPGQLAGTLCLTEAATQKLTAETILAGYPMDFPDGNLVESRGCKWRLENGIISHDCDTTGGQSGSPIVSSMSEMLGLHIGYDPNAPTIINTALGWNNATY…
FsTryp55	FisN_9Lh367	3106	Scaff.BDSP01000252.1: 648115-651220	700	5.8	75.1076	MKESLLHLVSLASLLSIVASQATYDCNVGCSLDASLMGPPVCGGDNLTYLNECLAVCQNITVASLGVCEGEDPFQESFVSSEPQVIPMSTMTRFSDYRFVGKRLPSTNFEEDIRYLLEEQMINETDDDFLEEMDDQFVPNYRFTPEGYEYRTTLTFEEEALLQPVAPQLGLLGENGLEDDGEDDGTRKRRELVLIGQDSRTPVADTTRYPFRTIANADYWWGEGGCTLTLISRTSALTAGHCVWNTNRKAPMNMTAIAPARFRDATKRDGTAEPFGTWEVDYVSLFGNFQQFGHTNFDIAVVTYKPRIRNNLSTCKELYPGDALGHVGLDRPAEVDGRVVDSRLSTMVITGYPYDYNRQMATSGPCDRAPESRRPNYINHYCDTVGGNSGSSVLVEGNI…
FsTryp56	FisN_9Lh368	3245	Scaff.BDSP01000252.1: 651655-654899	467	5.42	50.673	MRKTLLFILSSFTCVASQYDCNAGCSLDGSIMGPSVCDDDGFTYQNACVAWCQGVTKFNYGSCEGMNESRLSGFDFPGSADVITMDVMNRFAHESFRFVTKRVKFATQLDDYEDVVESDLVDRLDVPLHPHVLRITSEGYEFMAPLESTASTGIPNSSVANEGLAGQVDRKLLRERNLIVIGTDSRSVVPDTTAFPFRAIGSADYNYTKGTSVCTVTMISRSSALTAGHCVWRTSTNEPLPMMKVAPGRYVDASTGSMIDPYGTWDVDYTTTFREYKDSKDGNFDMAVVTFKPSNRPDLGCSNVYPGDVVGFVGIDRVLGTSSVVNDPRLAALIVTGYPSDYFGKMVTSNACSREALSGGSHYIWHFCDTVAGMSGSSFLLPNNVAVGVHAHGNWVSSR…
FsTryp57	FisN_9Lh369	2116	Scaff.BDSP01000252.1: 655465-657580	451	6.97	49.6302	MWNALLLLILWVAPAAAQYNCDAGCSLDPALMGQPVCGSDGISYANGCLAFCQGVKFTAGSCGGEGDRLEQIDLSGQTEVITREIMSRFAKESFRFVTKEIDFSRDPIRDFIHNSNVFSSSVSPDGFDTVRVTSEGYKFISKVKSFAKIQGPTPSYEGRIAENQPRLRKRKLVVIGEDTRTMVPDSTIFPYRTMGGLDFDFSDSGCTLTMISPTSGITAAHCLYDRAAKMTFNVTRFAPGRFYDPGQIDNTTEPFGTWDVDYTSYFKGWEESGNEIYDMGVVTFKKRRRRFLGIFSVYPGEFVGYLSIDRVGEDNSNVTDARFSNMTITGYPYDMKHKMITTGLCPNAPFSTKPKYIYHTCDTMPGMSGAATLTNDNKVLGVHNGAHNNPIAPGRVNGA…
FsTryp58	FisN_9Lh370	2505	Scaff.BDSP01000252.1: 658005-660509	470	6.54	51.482	MLKLSNNLVLAAYLILAFSFAGVVAQYNCDAGCSLDSAIMGGPVCGEDLLTYVNGCVASCQGVRKFTSGPCSGDADRIAMPDFSGNSEIITRAIMNRFAKENFRFVTKEIEFSTEPIVEEGSAEDEFNIFSPLQESATKSIVRVTHEGYKFIAKASSSTKMTSTQPYRGVVEDTSSNLRHRKLDVIGPDTRSVIGNTSVFPYRTIGAVDYNNPTLCTATMISRRSGLTAGHCAYSYSSKTWRPMKKIAPGRYIDLTQPDKTAEPFGTWDVDYVTVMQAYIANRSRTADIAVVTYKPRNETRYTCRDSTQVYPGDIVGYLGIDLVAGTDTSVTDTRLQTMTLTGYPYDFDEQMVTSGRCSDPPQSYGPNYILHYCDTEGGSSGTGLLTTENQILGVHNMG…
FsTryp59	FisN_9Lh371	2236	Scaff.BDSP01000252.1: 660565-662800	463	4.72	50.9371	MIRTWSILAASFTLARADYNCSAGCSLDATLMGPAVCGSDGLTYANECLAWCQGIELDSLGPCDSLLEESAFVMNSEVIDEATITRFAEEEFRFVTKRTRYAKKIENLENMTAFDDEYEVDEMGIDRHYVRITSDGYEYASRYSLLNDTMGPTMLYKGLADGYEFIVKNRNLIIIGNDTRSAVPDTTLYPFRAIGASDYRWGNNSCTATMISRTSALTAAHCVWNFNEGRPMPITRIAPGRYFDSETNQHLEPFGMWEVDYATAFGEYRETQSRFFDMAVVTYKPINRPDLGCDEVYPGDIVGYVAIDSIISSSNGVTDPRIADITITGYPYDFRRGEMTTSGPCSPPARSNGAHYLRYYCDTAGGMSGSALLTKENIALGNHAGGSGGANVGPVMSKD…
FsTryp60	FisN_13Lh320	1705	Scaff.BDSP01000253.1: 143216-144920	471	8.79	50.3824	MSANYCSYPKGWKKIAWITNVCLLVCITLSSGAAFVTRNSNDPVTKYRSPKNALHADNTFKVSAETFDDLNSLSPEERTVVSVVRSCGPSVGYVTSVLPSNQARNTSRTVLNGVPSGFPLGSGSCFIVDTTFAGNATYLATNYHVIEQAYELQTMDESGRRIRNEITGNLTALLPKSNELCEFINTTVLSSLFQQSRATVIPEIYVRVNSATRFQKCRIVGVDPKFDLAVLCLEGNSSSDSFQALKFGSSTDLVVGQGLIAIGNPFGLESTVTTGVVSALGREVTTAPRRRGLVSVPSIPLRNCIQTDCAINPGNSGGPLLNRRGQVVGINSAILSTSGSSAGIGFAVPSDAIQEEIRNIIRQDSRRFSQRGMVTLGVAIVKQSAWSDKNWIAKIAPNS…
FsTryp61	FisN_23Hh006	1649	Scaff.BDSP01000257.1: 326197-327845	380	4.44	42.1659	MNKSSIFLFALMQFSLSSSSSSFATTQQLVDTEHRSLIVNGADADPTQFPYFCTLEDYCGGVLIAPDIILTAGHCKGEHMHRVHPHVGAYSYDDYQESFRLQHAFRHPLFDRNDDFEDMVFDFTIIKLQGSSKMPYLAINRNNEFPSEHQDVVVLGLGVLGDDTDERPDVLQQVTLQTMSNAACNASSNGETSYEGRIHETNLCTHTPLKDACDYDSGGPIIATDEHGKEVLVGLVSWGVGCADPDLPAINARVSAVADWIDATVCEISEDPPKDFGCFPELVEDNSRVRLWSLVGGLVCILALFLMYGKRRCQQIYDMVYGDLFDDDDSDENEETEFVDGKTLFPLVKHGSEYTTLTVECCSSDEDSPARRNYRSISP
FsTryp62	FisN_13Hh320	2436	Scaff.BDSP01000259.1: 158765-161200	469	9.09	50.123	MSPNYSSYPQSWKKLSWIANICLIVCITLSSGAALVTTNANGPATKSRKNVFYADNTFKVSAETFDDLNSLSPEERTVVSVVRSCGPSVGYVTSVLPSNEARNTSRTVLNGVPSGFPLGSGSCFIVDTTSAGNATYLATNYHVIEQAYELQSMDESGRRIRKEIAGNLTAFLPRSNELCDSINKTGLSSFFRQSRATVIPEIYVRVNSATRFQKCRIVGVDPKFDLAVLCLETNRSSDSFQALDFGSSTDLVVGQGLIAIGNPFGLESTVTTGVVSALGREVTTAPRRRGLVSIPSIPLRNCIQTDCAINPGNSGGPLLNRRGQVVGINSAILSTSGSSAGIGFAVPSDAIQEEIRNIILKDSRRYSQRGMVTLGVAIVKQSAWSNKNWIAKIAPNSPA…
FsTryp63	FisN_13Hh099	1865	Scaff.BDSP01000259.1: 590157-592021	528	4.25	56.59	MKHLSVQLFVPFLSLSTTSAAYDPIIAMGVLDDGTSSANKQEGSVRSSSMSSEKPNNLVEAYIVGGREAQRGDYPWIIKSVTGFGTCSATLIHSDMALTAAHCQGVFGGGVYVSAYDYNHINDGSIFREVDRHYRNLDYNQNNSVVANDIMLIRLAEPVRDVPLVQLNEDEQVPRDFEELITVGFGFTSLEGDLPTQLLEVEMNSIPSESCFEDLQLFENVQPGPGLLCAGSRTGQASTCNGDSGGPLMTLDGLVQVGVTSFGVNCDTINLPNGFTRVSYYSDWIKETICKYSNDRPSDCPEPEGPDPGAVPINVTIRHDYFPAETTWAIRDRSDNSIKVAGPIGNPTPGSLWYTTVALVPGDYTFEVYDQRGDGMGSLLPENAGFFELSTNVSGASEV…
FsTryp64	FisN_13Hh084	1399	Scaff.BDSP01000259.1: 625778-627176	419	8.56	44.2426	MILIATSVAILLLSHNSLAWTENFRSRPAHSFCRRASACNGDQEGCDASSNTRRHFLQSLPALSSLLIVPQSARALSESESKRIAIFEKTAPSVVFLDTFTERRDQFSPNIMEVPLGSGSGFVWDKEGHIVTNYHVVRNALTAQIAILTDAACQQSCKNDGPIPYTSMRGSSSFGNGNIARSVFKAKVVGVDPSKDIAVLKVDAPPELLQPIAVGTSKGLKVGQTALAIGNPFGLDHTLTTGIVSGLGREVRSPIGRPISNVIQTDAAINPGNSGGPLLDSSGKLIGMNTAIYSPSGASSGIGFAIPSDTIKFVVETLIRDGRVVRPIIGISYLESRQARSLGITNGVLILDVPPGSPAAAAGLKGTRRTENGLIEIGDIIIQVGNTKINREADLFEAL…
FsTryp65	FisN_12Hh102	1561	Scaff.BDSP01000276.1: 49636-51196	472	4.7	51.7048	MLTFFFFLILSVSHAQQNTENIRELIVGGEEAKEGRFSFAEISLQIRRSHQCGGTLIAPDMILTAAHCQSWIDTAHIHRYDFKNSADVYMEMDPAFIHVHPDFNPSTFQADFSVVGLSKPVPSAQIVRLNTDASVPSANDPVVVIGWGAINITDPSNTIYPNRLQKAHINYITNEDCEKAEVQGQALYTGEIFSNMLCATSPGVDACRGDSGGPLIVEGAVEGEDVQVGIVSWGRGCALFPGVYSRVSDGYDWIRKEVCAFSVDPPAYMRCLDEERDSKFLSPDTIEQSIPSKAPVLHRSSGRVDVEISIQLDLQSHETSWTLSDNDGNVLVHVPYGAYDSFSAQTIDFTVRVDEGSDLFFVIKDEAFNGMSRGVSGWYKIFILSDLQRVEIISGDGDY…
FkTryp1	Skav214327	4627	Scaff.86: 169150-173776	197	5.06	21.375	MIVQLWSIVSTSRFSSDYPYLVSLTNGGHHFCGGTLLDERWVLTAAHCFGTAASSISNIEVRMMQASDSRTSQVDLLVAHQAYNMDVLNDDIALLRLATALPVAKYAKLETSSRRHAGSKALLAGWGTIDEWCFQIDDVLREGDTYIAGNSACGDLDWAFNWSELVCTAHINTTDKVPQMPVLPGELGSSEHHGAS
FkTryp2	Skav227914	1201	Scaff.146: 135264-136464	110	8.79	11.4211	MPLNKCIGTVCLPQWDEQAGTRCNITGWGLLKEFGGVARSRSHPAVITGSMLCASGLDANRGVVDTCQGDSGGPLSCQEKGKFVLRGVTSWGQGCASPNFPGVYGKFRA
FkTryp3	Skav206445	937	Scaff.295: 245084-246020	180	5.93	19.3598	VYRDPIHDFGFFRYEPQKLRFTEPAVISLEPKDLRVGTEIRVVGNDAGEKLQILSGTIARVDRNVPEFNTVYNDENTFYAGAGAGTSGGSSGSPVLNKQGHAIALNAAGTDGAASAFFLPLDRVCYTLACLQQGVSVARGTCQGSFLFKAFDELMKVSKLHGMGLKWAFSSWERTGGED
FkTryp4	Skav211538	4718	Scaff.352: 473524-478241	373	4.67	40.176	MGSPLNGRKTKIVHGRNARQCAYRWQVSIQSTVNNQPWHFCGGTLISDKWVLTAAHCAAEVSDMCQLRNLRVVAGDWRRSFESPGVVTRSVKKIFSSPSYNVESDNDFALIELDAPMPVTDCIGPACLPTEEQQKATDTECVITGWGTMSSSGGLPDALQEAAVTLINQAACVTAYAKQNDTVTGNMICASGNTDAGITDSCQGDSGGPLVCEENGRFVVRGVTSWGEGCGMEGFPGVYARVSSALGWIHDVMDGKVQKSDFEPEDIDFSGAMWKVMEGDCVMDEKHCITTPQFPNNYTSADFCRIAVDYSAARPIQVEQFQTEKFYDTLVVNCEAYSGARSPAGVVPTSDIYWDSDGSLTGAGWRLCPGAI
FkTryp5	Skav210315	1307	Scaff.475: 263982-265288	191	8.95	20.8605	MVRSRLREGQADDTPVRKGSKESVRGKKRRPVVGGSLGSDDEEDAFGACEEDEEGLEGLGVPLDSVVKVWCVHSTPNFSLPWQRRRQYRSSGSGFVIDAARKVILTNAHCIEWHTQVKVQRRGCDTKHLAKVVSVGWEADCAVLTVDNDEFWQDIKAVQLSKKANFSGKNVATGAAFGGARFVRGISCGR
FkTryp6	Skav216311	240	Scaff.494: 242862-243101	80	7.7	8.42654	MLCASGHSESGITDACHGDSGGPMVCAENGFFVVRGVTSWGLGCASRFPGVYARVYPALEWIKSTMASSDLPWRRNRSA
FkTryp7	Skav218790	21521	Scaff.1140: 130635-152155	677	5.7	74.35	MCHAVSDLKWPEVRKRGDDEKFEAEILARATDCDLAILTVRDESFWNAGSLSAQTLCSDVPALFSEVVCVGYPTGGDNLCVTKGVVSRVDYEDNPDPWRNRLVIQIDAAVNPGNSGGPALIAGGRCVGVAYESLKDGSTENIGFIIPVSVVQKFLTAWRRVANALKGSPKTEDESIMRGQSGVIIKSVDPTTPNAKALQRGDVLLSLVGVPIGNDGCVPFVCGSSRHDRVPFPYVAIDKFVGESLDAEILRNGVKRSCTLELLPQEPLVSVEKEAPWLIDYCIIGGLVFVVLSQQYLRATFGEKWKKERCNGLAEILDSREREFPDEQVVLLSYVLSHTVNLGFQDVRNARLNAFVVDGKPERIRNLAHLSELADSFRGSGFLPEIIVLERAAVEAAEE…
FkTryp8	Skav212675	1847	Scaff.1227: 830280-832126	452	4.86	49.4344	MSLVTFCFHKMPLPWMFSLVLLACASAGLASERRLIYSYNDSDRIVSTARFSSDYPYLVSLTSHGGSHHFCGGTLLDEHWILTAAHCFGTAASSVGDIQVRLMQASDSRTSQADLVVTHESFDMDVLNDDIALLRLATALPVAKYAKLEDRSRRHVGSKALLAGWGTLDEWCFQVDDVLREGDTYIAGDGACRDLNWAFNWSEVICTTHINATDKAVAGAGCGDSGGPLFLLENGELVQVGIVSFSQGGRDQFTRVFTYTNWINNVLQSPPTQSQMVLPRCFNSCCDDPDHLDSYGATCDTWKGYDCLAYPFEVGLLQKCAATCLQCPLCEATNTACCDVGGYLDAEGYACSSWIRYDCTNYAGFSSAELADLQSNCPLSCGLCSPGTDCTNNEGWLDE…
FkTryp9	Skav209608	4740	Scaff.1634: 304061-308800	170	4.7	17.882	MKLVPVAIICLPTVIGNDNAEKIQILPATIARTDRNCPEYHDNYEDENTFYAGAGSNTSGGSSGSPVIARSGNCIALNAGGAHEAASAFFLPLDRAVYVLEWLKSHPNEIPLPPRGFTAEQEAEVLALSPDASVNDRQKGPGAEGHRWAAGAPQLVEGEVYGDMPLVTL
FkTryp10	Skav209668	1167	Scaff.2126: 278934-280100	389	5.55	41.2032	MFAALLCQQYLLCFFSGQESQGRVVNKSNKSLIQRRLSVVLPLLGAGPANALSKDEQLVTSLFERVTPGVVSIAKEAPPEDSLGTKPSAGLAGSGFVWDDRHVVTNYHVINELQTPFVTFLLNDKSGSKRQSYLAEVVGYDTTSDVAVLEVQNPDKSSLPKGVMQPLSRGHSDKLLVGQNVFAFGNPFGLEHSLSRGIISGVSRKMEGTGGRPINGVIQTDASINPGNSGGPLLNSDGEVIGVNTAILSGSGMFAGVGLAVPIDTVSKNVESIISKGFVKRPLLGLVFAPDVMDQELQLSGIMVMKVIPGGPAEDAGVRPMRGGRLGDVVVAMDGRRISSTDDLFGMLETRAPGDLVKLRLQRPNPDVDSDVMEEIEVPIRLGQATEK
FkTryp11	Skav229257	15825	Scaff.2418: 103682-119506	559	5.43	61.8558	MSVAKRVSEEYGCPDTLIKYMTDGMLLREILSDDQAASLEADHLHRCSLWTAEGRSEASSLRLSACQHCLIGIQIDMSSSFAANLPRKRKELKLIVTSASASMQNTDLKRLTTDLCKSVKMATVAFKISTRQQCSAKLPSCEATLDAEKFSSYFFNSHIFTIPGRILEFWTVIPCVPLLWKCLQDLPSGNPLLEGHAPAPKNSQYSSHPEPEAVQPWKQSCFQDPEQDYVEAALMTVYSALPSEMQTMIFECLAMPTGMAKAMGIQDMLSFDFMDSPTLGSLDDEGMLTDLGRKMAEFWEGLQQVKLSQKLPHLEEDVLSLGSSLCVGFPIGGDTISVTTYTQASAELLGIQIDAAINSGNSGGPAFNRCLKDLLKHGKYTGFPTLGVDTQTMERLCFF…
FkTryp12	Skav207395	5132	Scaff.2421: 96854-101985	398	5.14	43.108	MRCLQTVRLVAGLILLPVATANLRGGINWAECGVLGQSTATQRIVHGQDAGQCVWRWQVSLSSASDGQFCTLISPEWVLTAAHCITKVRSACEVRKLRIGAGTWKRREDVDVSDTSVERKVTKENVAHDYDFALLQLDKAVPINRCIGAACLPRSWGTLVSSGPTPELLQEAKVTLLTNQVCEVNYTESKNTITGSMLCATGMSQKGITDTCQGDSGGPLVCKETVETRDGRMMSDRYVLRGVTSWGQGCAYEGYPGVYGRVHSVMSWIEDIMENKVKKVYAADVKEDFSSLDFGDKMWLVVSGECTIDSSNCLLSPGFPEPYEDGQQCKVAINPSGALPLAVMNFSTELGFDKLYVDCKSFSGDTGPDGVVPTSAIFWTSDASVTESGWRICPDTS
FkTryp13	Skav215152	6960	Scaff.2462: 218792-225751	244	9.55	26.0649	MDLWRPWARSHGSGFVWDADGHIVTNSHVVQLSSLLAVHFASGGACRAMVVATSERCDVALLKLKMSSCSGAPGSAFELPKPLPLSKFAPKLGEETAVIGITTWQFQSVPLLTAAVSTSTLQQILPQLRDDHGAKASTIGLEEHLGPAKLLLPRPSNADLGVSSGGVRLWPGAFRARGVWWLDEIVKVGAQTLKSSRSSPVYSVADVLEAVQQAPVGSQLQLELRRFGRWNRTATAQAQRLGL
FkTryp14	Skav221219	822	Scaff.2467: 225577-226398	274	4.51	28.5009	MLCAQGSSSAGIVDACQGDSGGPLVCARSDGRYVLHGATSWGYGCADAQYPGVWARISHVLPWLTQHTGIEPGVESGNLTYNISNQSIPASATHLLVYTAMNGLEMTTGISIPLVDFAPVQVEPSSISFTDTDASPGELGGTITLGRASDESEVVGYAVHWGTASVVMDLVMQVPSGSGDNVELQLPANTVIPTGATHFLGFIISSSGRGANYVSEVIADLDSSLVSGGLTFQDTDAAPMHLGGIVTVQQARWCSEHGFVTALKHCFQFFFNV
FkTryp15	Skav229949	1299	Scaff.2665: 176073-177371	433	6.49	47.1262	MLFQWLLLPALVVDGQSWGRWHRGHQGWSHLRGTEDWRQCGILGKGPSSENPKTRIVHGQDADECVWRWQVSLSTPRDQFCGGSLIAPGWVLTAAHCVADIRGACAVRALRIHAGSRMRLPGAAGSEVTRHAKRIFVHPLYSQNVQHDYDFAIIQLDKAMPSNQCIGTICLPHQDERAGTQCNITGWGTLKQFGEAPKVLQEAAVTLLPDSECEQNYRESTEVITGSMLCASGLDAKKRVVDSCQGDSGGPLSCQEKGKFVLRGVTSWGQGCGSPNFPGVYGKVQSVMSWIEDVTGDKVKPNQDDEHQEAANISGIDFNGSMWAVVKGNCTKDSSGCIMSPGFPQNYTAQSLCVIAVNSSAAVPIKVVNFSTEHNYDSLISDCQYFSGKKGPEGIVPQN…
FkTryp16	Skav224591	903	Scaff.2684: 143458-144360	301	5.23	32.0148	MAKDGDSHSVHRRVIEIHVHPLYSRNVAMDYDFALLKLDQAVPINRCVGTACLPSKSHVTGSNCSITGWGTLESDGASPEILQQASVELLNRERCEADYAAKDHIITSSMMCATGRSASGITDSCQGDSGGPLVCQEDGRYILHGVVSWGEGCALASFPGIYSRVASSLAWIEDVQAGKMQSANWKSVDDFSKVDFNGRMFAVLSGDCQVDGFGCVSSPGFAYGNNYGNSEKCRIAVNSEVVAPLRVESFSTESNYDKLIVNCRAYSGSIGPSGVIPVSSITWSTDSSATGYGWKLCPSS
FcTryp1	FRACYDRAFT_267240	1849	Scaff.KV784353: 1790414-1792262	430	4.55	47.6027	MTRTTTIAMAMAMMTTTKFYLCLLLVLSSWVEAQTETRNQTEPTHNLRRHDDVMMPMKKPRIINGKEVLVPRYPYFSLMYGRSLCGGVLIGPRLVLSAAHCEDASTQFRIGAFENPNDGEKVNIRSTIVHPDYDVSRFDNDIIIFQLETDVNLPYIQLGSDYVRDGSYTVIGFGDTDKGQDLVLSSTLQEVELEYVDSDKCDDGHGDRDEVKEDMLCAAGKNKDSCIGDSGGPLIKKGANSYDDTLVGLVSWGRGCAEDGVPGVYSRISYFYDWIVETVCDNYADDAPSYMSCGLNPSFFVFTNKPTEAPSKQERITSSPTKLPTASTPTQMLTRPLLPISPVSTLPDTIANNTMFPIDLRKDIEFVAWTPTVELQDCQGDCDTDDDCRGDFLCFKRNG…
FcTryp2	FRACYDRAFT_161693	859	Scaff.KV784353: 3353084-3353942	237	4.82	25.848	IIGGNVATPGDYPYFVHFDGIACGGTLIAPDIVLTAGHCKLPYPSSYGIVHVGRHDYRMGLWLDGSQLFDVVKQVRHPQFNDALCFSHDFLLLKLDGQSSKQVVSLDTNKDSMSDGEELHVIGFGDTTLAPYQYDQPDRLHEVTVNYMNNQQCARSSIYPNSLLPEANFCAMDAGEDGCQGDSGGPLLMKGNINDKRDDVQVGVVSWGLGCAEHPGVYARVSEGYDWIEKQVCKIS
FcTryp3	FRACYDRAFT_164298	267	Scaff.KV784353: 4444019-4444285	90	9.33	10.0203	NTIINDKTMLCAGDMNGGKDACRGDSGGPLFYHKDKDDDDDDKRRRRKRQRQRPIQVGVVSFGKGCGLKNLPSVYSRVSSAYDWIRDVV
FcTryp4	FRACYDRAFT_206545	1722	Scaff.KV784355: 1337780-1339501	186	4.3	20.5151	MAYDPSTGLVNRYKTFDLQISFPDYYSNLDIINYDLMILRLSKPITDIKPVMINADPDFPINSNSSLLDALGFGLTEDGSVSQVLKVGHFTPITNDQCFQRFRIANVDLSEDILCVDPSTDDSICAGDSGGPLTTSIIDSNNNINTVQVGVVSFGNECEPDWIPDGFARVSYFTDWINKRKKLAK
FcTryp5	FRACYDRAFT_183168	327	Scaff.KV784356: 3014391-3014717	110	4.32	11.4357	MTFFFFFTIAGFVHDVTVPTISNAVCNSPNSYNGDITDAMLCAGFSDGGKDSCQGDSGGPIVRPITLSDGTIEHSHVGVVSWGYGCAEANYPGVYARTSSGSAWIIDQV
FcTryp6	FRACYDRAFT_207797	1794	Scaff.KV784357: 1520718-1522511	421	6.48	44.9235	MSSYLQSKRQSPTDHDCKIIGRNDNDDDLNNDLQDSIISKPTTKRRKILLSSAAAFITTIIASSGTPKVAEASSLAGLEDTEKRRIEVFQRNAPSVVYIDVIAERQDVFSPNAVDERIGTGSGFVWDKDGHIVTNFHVVRNSKFAQVALITPRRNIFKARIIGVDPGKDIAVLKIDAPEEILYPIQVGKSLGLIVGQTALAIGNPFGLDHTLTSGVISGLGREVKSPIGRPITNVIQTDAAINPGNSGGVLLDSGGKLIGMNTAIYSPTGASAGIGFAIPIDTIKYIVNTLIKDGKVVRSILGISFLESKQAQALGIGRGVLVLGVPAGSPAAKAGLRGTKRTETGLVEIGDIIVQVGDVMIETEANLFQALETYKPGDVASVKVSRIDAVDDKLLQRE…
FcTryp7	FRACYDRAFT_268874	1575	Scaff.KV784357: 3173994-3175568	432	4.28	44.9951	MKSSIATSSSSLLSTLIVVVAIVISTSTASASATNSASASHNNQHSSLRRRGLIVFDDINNVTELELESESLLGLEQQQLEREPRIIGGSVVNDRSRYSYFALMNGNALCGAVLIGSKFVLTAAHCAYADTDFEIGTVSRTNNNGVDWGSLFGGSGSEGSGIEYDYIAGRIHPNYNEDDVSNDIAIFELKQAVPSSVATPIKLRQQPLTKSDSGTIVTVIGFGDTDKSDSVSATSNYLREVDLNYVTADQCNNAYGGGNSWFYGGNSYIEDGMMCAYRSSVDSCGGDSGGPLLLKGNSGGLSSTGSSSDELVGLVSWGISCADDDFPGVYTRISYYYDWIVATMCELNSDPSGLPDGVVCHGSSSSGGGGGSSSGSGSSNSGAGTSRVPAPAPAPAPVP…
FcTryp8	FRACYDRAFT_239622	1964	Scaff.KV784358: 2848556-2850519	637	7.06	72.349	MPRKFDKHTMFSMAIPDSPSGTGITKKNIEHIRSQWEYELEDTTRVVMHRHRSQNDYEKYHNNKVSRGVRKRNGLYHTEIKLRTRKHKIIKQAKSNLDKKRLSLKHGKKLTSVERSEYRSFVDEQWKRTLSIEKLQSYLRHGLPNYGNGWGDSSMGLDLLKNTATIFNATRLDDLPISPIERSNIGVIINTWISNTKDKRRPIKDDEESWDRMKLYFDEAEVVLNVTRQQPANILENKRNMEAFNSFYVPPFLNQLIKKEDIDIDKKTTTWIKAQLCGKAPEAQRALDRLQEIYQDLTNNNKISAALQACRGIYAGSSLLAVGHSLHEYILIEKSKPDQEREAGYRERNLPFLFKRLGKRLGDIHIPHEVALIGDAVQTLSGTAELDKMHASIMDILED…
FcTryp9	FRACYDRAFT_239623	849	Scaff.KV784358: 2850834-2851682	283	4.59	31.3786	MSMSPRFRTWPITATRSIEPQLRSMGLKIPAKWIDGTSATSGDDDDKDGEVNGKSQRHTYLSDALVSVGPAGRGGTGSFVSNEGLIMTNWHVAYDAVRQASLQSNGVDYVEEGFVARTRTEELQGPNYEVWITKSCRDVSEQVVSVIASEVDPLVRANRVRDVMQDIASQAQKESESEGEGEGEGGGIRCDVQEMLPNESYVLFTYERLRDVRIVYVPPKSLGNFGGDADNFEWPRHTADFTLLRAYVGQDGSAAEYSPDDVPYEDREKNFSYLFGYLELIF
FcTryp10	FRACYDRAFT_186696	864	Scaff.KV784359: 1455992-1456855	289	4.26	31.6469	MLNINIYLLSIIVFIITFTFTYASTTSEAAAAEAAAAEAAEIASSSNTKTLRIHGGWDTTEDRYSYAQVSLRYKSEGHQCGGSLIAPDVVLTASHCSGSFDKIVIGKHETNDITDLSETFVSTLELIHPDYDEDTTRYDTMLIFLNSTSTMGRPVRVNNNDQLPRHGSMVTVIGWGYNDAWDLPDVLQETSVRYSQNSQCDDLIDEDGITLNGDLFGDMMCAGSDGRDSCYGDSGSPLILTGNTEDEDVQVGLVSWGYECAGHLPGVYSRLSYYNNYEFLESRVCMLS
FcTryp11	FRACYDRAFT_209155	1753	Scaff.KV784359: 1981377-1983129	432	8.88	46.2754	MGFFVATSVNFFYIYLSAIILVLLLHSVVPFSSVPYRHVAVDRVHSLFALTVSVGELEKDLTPSERSITGVVRQCGPSVAFITSVSPAPVNTRRRGQSRRRQRQQQDNDSSTDLPRGNSLGSGSGFVVAPGYICTNYHVIERAYTTQKNAEIAEHTFDELAGNLTGGFITHDILNITKSVIKNKLPDYISFGASSDLLVGQSVVAIGNPFGLQSTVTAGVVSAVNRDFRAGTARTPANTPIRNVIQTDAAINPGNSGGPLLNLKGEVVGINTAIISTSGSFSGIGFAVPADQLKPIVTRIIREDRIQNGLRPNQGWLGISVIRQNININSVNHSNSTLPLAKSKNWVAKVERSSPAYDAGIRSLDISLNGVVTYGDAIVAVGGNEVTNFDELQMQLEKC…
FcTryp12	FRACYDRAFT_151609	804	Scaff.KV784360: 772625-773428	269	4.35	29.1404	RIVGGQDIEPTNRYPWFARVIGNKPDGSGLDACGGSLIAPDLVLTAAHCTEPTIIYLGVYDLDNKPDNSGYDVIANVRHPLYGTGNYSIDYNIMISQLAIPVPSIIAQPIRLNFDPNYPNDNTDAGLDLTMLGFGSIIGGPETGLPNPPNQESSLLQSATTNYVPLSTCAMSKDPNTGVVYGVDYPQRTSVKENWFCTVDDVTATCFGDGGGPIIKEHYFSNFNNNNYNQDTDTNDLLLGVISGASGYCGNQYLPLWNSRISFHKEWI
FcTryp13	FRACYDRAFT_262063	2264	Scaff.KV784360: 1802159-1804422	547	4.85	59.0912	MMMKAPSISILSKLFLILALSGASLKCSSASDDTLPTKEVRIVNGVGSDPTKRSLIVNGVGSDPTKRSFYVKSAIDRLDYTSDVLCGATLIAPDIAITAAHCQGAFNNGVLILDGNTNDFTRLVSIDKQRRHPGWSINRESLNFDILLLRLATPLTSTDVAKPILINTNSFIPSNGQVLKAYGFGLTENEVVSQNLKEADVTYINNDECWGRGIQFNNVMKGEDVMCTDPFGGKTATCLGDSGGPLTDESGTTLVGVISFGSGCEADNIPDGHVRLSEVSDWVEQQICSLSAVPPADCVETTSRDSRAVQMKIDFSHDFFPEDTTFAVRSKETLEIVYAGPEYIPTRNGSYESTLYLLPGEYTFEVYDVTGNGLVSGWVQDSMRKDGSWTMYALYDDYT…
FcTryp14	FRACYDRAFT_241264	2093	Scaff.KV784360: 1806194-1808286	568	5.01	62.9282	MKKYQAQPKAFALLVIGCILFLNSKDSFVFAQYHHVDEIIPQTQRRRAIINGRVVVDPSSAQFFARSGQDQNESTTDYLCGASLIHDDMLLTAAHCQGAFNYGVLLYDPDTNDYTREATVDLQIRYPYFNRKDMHNDLLLLRLSKPITDIKPAMMNRDDSMPTHDNNVMKAYGFGKTSSDEPSSDALREGFFRYITNDECSERIRSTRTKIYDDVLCADPASMMDVAGTNTYAVGYSNDNRGSSICQGDSGGPLMDATSNLLLGVVSWNFLCKVDNLPDGFIRVSYFRDWINERKKLSEICFYSRNPLSLNNECPSGTTPPSPAEDSVEVLFIFEHDFYPEETVFRVLSKDSNIPPYAGPRYVPSRNSAWTSRLHLLPGDYVLEISDVVGDGLRGGTSG…
FcTryp15	FRACYDRAFT_241501	1671	Scaff.KV784360: 2538226-2539896	472	4.45	52.8492	MATNNNFCHQHLLLLLVVIVLVIQVVSADDNDSHNTPRQNINNNSSLRHGRRDESSEVEAEGEADVDEPDQKLKESLLRPEKQTRIINGNQVKELRYPYFALLTSDQISTEKFRCGAVVIGPRLVLSVAHCDVFDLDQMSFQIGAYKNLTDGRTVKINSKTIHPQYNETEFLNDIVLYQLEANMDLPYYIELDRNSDGKTNGLKKEVVNYDINSSNDEDDKNGTNGNNKLVVIGFGDINPNDTITELPNSLYKVEVTYVDNKQCDIEHGNNNEITDGMLCAGGDGYDSSFGDSGGPLIKQQQQQQQQDTDDDAIDEDAIDADTDDILIGLVSWGRTMNEPGVYVRISYYYTWIRTIVCDQYLDDAPDYFECQTPLPTKEPTNPPRLFDGFKAPTTSKEP…
FcTryp16	FRACYDRAFT_152354	893	Scaff.KV784361: 1040109-1041001	239	5.26	25.9402	IVNGNDSSGGRYPYQAMLFRETGPNARFGCGGSLIAPDIVLSAAHCGIPKQVEIGRDSRVEDNGNFDRRDVLYSYRHPRNDKQSYAYDLLLLKLSAPSTKRPIRLNDNPALPIVNQLVTVTGFGKLAYNGVPSITLQEVELNAMSNDVCSMSKDLNSKREDFQQGYEGLIQDNMLCLNDLSGSKKDACSGDSGGPAILRGNTSEEDIQVGVVSWGYECALPNFPGVYAGINQSIVWLK
FcTryp17	FRACYDRAFT_242233	6910	Scaff.KV784361: 1961933-1968842	2212	8.4	244.047	MSTNVDVSGGGTRGRPIHFPPRQQPLNETPDETEPSYSYEEQSFLAYDRQEDAVDEFHRQFAASSGAGGRHNNNNNNNQHNHNNNQQHGHSGGGVVAGGGRTMANTSTSSIPDLGSSSLLRDNNNNNNNSKNKNSSTVSSEFGGVNPRRNGNGNGGIIYSGISGGGGGGGSNFWKTTTRQTSRTSRASSSSGGGSGSGRALGGGTGRLRSSDQTTAQQRYADVDIDIDNKNSRSNSFSKKNNSIHKMKTILSSGPKMFGATRKPTREAANDNQQHGINVISSPKNQKQQQQQQQRSSPPVHPFHHSASASSLGSTGSNSAEARLKSKQRDEVRRLKLDAQQQLGVDGGIVDNGYYTEVPTVNSNININRDNRNSNSYNYDNGNGNGNNVQVSSGHNTTM…
FcTryp18	FRACYDRAFT_244069	1731	Scaff.KV784364: 1124884-1126614	396	8.45	42.6384	MRVTSGFIVALVALSSTVSPVKDVDNSERRTSIINGNEAEIGDYPWFASIVTRFSLLGFGVICGGSLISSQYVLTAAHCGDRTGEDIYIGAYKYRSTEGGAQLRKCKQWYADPDFQFEGTAEKPQTPFQFDYALCKLDSPVTIAGPLSTLVLNTNNEYPPPGTDTISIGFGVVNIGGNIPADILQEVTIPTISNEDEVCIEENGDRPANTCTCGPSFVRLNNGDGTFKDVHIGVTSFGTFGCSGTAVNARTSFGIDWVKSIVCEDPAGQDADFCQTAEPTSSPTSTPSSFQASSPTCTDDPGFEANGKKCERFLDRKRNKKCKKIIDRTLVADSCPSLCKRSCLTCKNKSGKIKLKNGKRYNCKKIKKKKKCKKKTKAGPLANEFCPAACKIEGC
FcTryp19	FRACYDRAFT_244243	2423	Scaff.KV784365: 129603-132025	527	5.99	55.665	MLRTTIVNAVVVLTVFSSVVVQVVEAESRIVGGNNAAKGQYPYYVKTEGCGGALISPSVFLTAAHCGNRQGENIIVGALYSNDKKNINKADAVKRKCVEYIEDPSFDFFGNNNNPDGRVPPYNNDFAVCRLDKPVTTLQTIAINEDPNWPPLKTNGSPTQLTTIGLGTLTSGGNTPSQLQTVQVPIVSNKVCEKNYGKNEIFTPGNICAGAKNKDSCQGDSGGPLIFTTSNQDYHIGTVSWGEGCGSRNKPGVYSRTSTRADWIKATVCDTFNEKNDKNAILCNGGGGDNPVTAPVTAPTPSPVGSTKGCDGKGGKELVIELTTDDFPEDSSYTVKDLGNGKNILVKKNFQEANKLDTEPICIKAETCFKFTIKDEFGDGLTQGGSGGYELYLDGSSVK…
FcTryp20	FRACYDRAFT_263277	1674	Scaff.KV784366: 203299-204972	423	4.28	46.6081	MKLLSSAIISFFSIVITVDSLITAAAAVVTATSTEDNSNSNMINRRPTRHLRDEQQQQKQHQYNSNEDNSNNRNLIVGGQQAKVGDYPYFVGFGGDWWCGGTLISSEFVLTAAHCQFGVGDDVYIGDYESQTTKEGITYKRQCIEWIEDPRYNDYGPPLYYDFALCRLNEPIAIDQTRTKLILNSDPNYPPPGSNITLIGMGSINDHPFPAPVQIPKYDDTVDINTAEEDSPNSNTDDYGGYVLRYPKFLQEVTSQIISNEECREADFAACESLPMETCITDSEICNLYKYGSLEDGQDACWGDSGGPVISRVDQGDGTFKDIHVGIVSWGDYCGNSVHPNINARTSSAFDFIQTIVCDEFGTNPEDASFCGGDGDDGTNNNGVDVGGDEGDESTTNLR…
FcTryp21	FRACYDRAFT_263370	3434	Scaff.KV784366: 1241048-1244481	802	4.2	86.8232	MPSILSLILLLLLLLTITSSTVAVQQQQQHQLRRRRRRVETGEVKEPDQKEHYNNANNATIIDDNIKRNRIVGGQNVNFDPDTNTNRYPWFARVIGIKPDGGLDACGGSLIGSDLVLTAAHCTTPTKVYLGVYDLDNKPYDGIDVIANVRHPLYGTGSYSIDYDIMISQLATPVPSTMAQPIRLNFDQNYPNEDTDNGLDLTMLGFGSIIGGKETGQGNPNPPNEQSSLLQKANTNYVPLSTCAISKDPDTGIVYGVDYPERTSVKENWFCTLDDETATCYGDSGGPIIEENYFNFNNDNNQDTDQDTDDLLLAVISGSSGYCGNKYLPLWNSRISFHKEWILYWGCQLSGGIGSNNAPKEWNCTNDDNDRNNDIGSITISKSNVPIDNNVYYNNNLDD…
FcTryp22	FRACYDRAFT_154621	378	Scaff.KV784367: 1257509-1257886	127	4.26	13.4376	VAGFGQRNTEDVSVPPTLQSVDVALIGREECELNYNTNSNSIESDNENEDDNKKIKPDMYCAGAITGGGKDACLGDSGGPNYVTDSTTSNKIQLGVVSWGIGCAQEGYPGVYTSVAYHYEFIRTSV
FcTryp23	FRACYDRAFT_152518	1182	Scaff.KV784369: 716217-717398	213	4.9	23.326	CGGTLISPTIVLAAAHCEISLVSDAVFQRYYHPSEVGINPSKEIRIPVKEEIKHPNYNRRTLENDVMLLILEKSPNDYVRNKGQSSSPNQTPLKLTALGWGHTVSGGKGQPSDTLQEARLNYVYNSECNKAQESNLVNYDGRISPDMMCTWHSQQDTCHGDSGGPIVLENLASILENANDNTDMGIVSWGEDCADAIFPGVASRVSESYEWI
FcTryp24	FRACYDRAFT_271061	796	Scaff.KV784371: 717352-718147	254	5.09	26.6839	MKFTSQTVVSFIAATTISIYGHGVVGSSESSLRHRSVLVVGGDESDYGEFPYYVSMGGCGGSLIAPRVVLTAAHCQPQNYNINEQVTVGPTKRNSLNNEGFKNAERILVTDAISHPKFGEGTGINYDYALMLLETEYIIESDITLKLNFDSDFPEEGSVLDVLGMGTTSSGASSVANMLRDVKVPAITNAECKNNYGSSSVTPQMLCAGYPEGKKDACQGDSGGPLVKITGNIHTQVGITSWGYGCALAGKAG
FcTryp25	FRACYDRAFT_194079	537	Scaff.KV784372: 259209-259745	179	3.96	20.7497	MNGGKDACRGDSGGPLFYYKEDDQDDDDDDDDYDNRKRRRKKRRPIQVGLVSFGKGCGLKNLPSVYSRVSSAYDWIRNVVCGEWRMPMPMIQEVVDDDEATEDNDDDDWFLCKDYQHHQYPQQQQQQQQQSDDDDDDNSSTNDEDDDDDENDDDDYEYCDKNNNDVSLDFQLTADAYG
FcTryp26	FRACYDRAFT_248055	2076	Scaff.KV784374: 514044-516119	640	4.6	68.7866	MVLVPRTWLIIVSHLTLTGITATKEKNILLRRGNSFNKEISQPLIRGRRGRTAASSTAISSRHLIETKEDDSNEDLKLPFLVSLMDASYNHVCGGTLVATDMILTAASCQDEGILSYVRFQDGTVLLQEENTGATIEILTTLPHPGYNRQSRIHNIMLVQLAASVESPLSSSMTGENMFVQLVLNDIATTSYPSRWPVPILQEGQSLLGFNYRQSTRYSNGVKDNTVVNNQWGDWKLGYVGKEKCMEQTDTASTYEGVFADDSFCIERRNDNQLSSSSSSSSSLSYAAAALCQPGELGGPILWISKTTNSRLLLGVNTWGNGCLSADLPDVAGLVSVGSDFIRSVICEESMNPPSYMRCAQSTEISLPTTTMSSGVVGGVLSGTTSFATRVTTTTSRVE…
FcTryp27	FRACYDRAFT_194596	201	Scaff.KV784374: 532593-532793	68	4.8	7.34654	MFCISCTSLLLLLLLVFHHWTGPYIVLGTTPEEDVQVGVVSWAVNCASSQFPMVGSRTSASVDFIRD
FcTryp28	FRACYDRAFT_212042	2094	Scaff.KV784374: 549499-551592	392	4.58	41.9729	MNNPILSSLLLPLIAVLLVSSSVRSSSSSSSSSLRGLNTNELLPTKTLRIIGGGKSELGRFPYYAIMNGESLCGAVLISSRFVLTAAHCRDADKDFAIGPSKFSGGIESLIVNRTVHPLYDDFTYNNDIALFELADDITDIQYVKLERTEINEPGQAMTVIGFGDTNPAEKETDFADYLHQVDVNYVSSDICRRAHRGEIDDDMLCAEAPNKDACYGDSGGPLLLTPNDNSNDDRLVGIVSWGRGCADEEYPGVYSRISYFYDWIVKTMCTMNADGVPDYVDCNEIIGIADNRDEDFSLTGSNINTTVPTTESPTPNPVTPPPIETCGNRGAMCTKVDDCCSKRCNFGTGTCYPKSTSGRDKISNGMGGSAGGGPARRNGILGGGLGLQLP
FcTryp29	FRACYDRAFT_164691	258	Scaff.KV784374: 740892-741149	87	4.87	9.01998	EDCNKRASYDGNITDAMLCAGYPEGGKDSYQGDSNGPLVKRTILADGTKQDTHVGLVSGGEGCALPNKLGLYARTSSGPSWIIEQV
FcTryp30	FRACYDRAFT_249019	2526	Scaff.KV784377: 601652-604177	536	7.95	59.4434	MKMKMMNISPLMLFAWIVAFVNANSEELMIEKNPLSYNNDTKVDINRNLIVGGEESEVLGFPYFVQTLQGGCGGVLIANEWVLTAAHCGDLTGEQVLISAFKYFDNTGGFGSRVRACVTYIEESKFRCRAEVGDGRICDRNNINNESPFKQDYALCKLNLPVYVDDENVKLELNFDSDFPSTGDDVIAIGFGSTRLGGPQTEFIRDVTLSVNSNRECRNADSKIYNPNSIGSESICASDPEGGKDTCRGDSGGPLITRTFNALETKSVHSHVGITSWGDNCGEQGSPGVYARTSAGRDFIKGTICNDFQSKSPFCQTPVTCNVNDSETKLTIKVRPDNFPEETVLIVRDITGGVGDETLLEVGTTAENRRSSDIYRFFTYEESLCLRPGRDYLFEIFDR…
FcTryp31	FRACYDRAFT_264414	1859	Scaff.KV784378: 12677-14535	373	4.57	40.1348	MTMTTTTKTTTTSRYFLPRIFASTPTTITLLLFLITCCRLNTSLVTGANQPNLRIVGGNDADPAEYQFFAAWGSSCGATLIHDDILLTAAHCNPLTTNRVVVGAYTKHQANEPDPVNSVSRTIEQRIIHPDYNVDSWDYDVMLLKLDEPAPSSLPKVTLNNDSSKPAALSTVFPLGLGRLAEEDGDFPDVLQEVNVRVIDSDTCSRSPMYPGWIQDSMICAGVSGGGEDACFGDSGGPLLQRDSGGNITQVGVVSYGTGCARANKPGVYHRVSASYDWIQEQICEFSSSKPDSCPGLKTAVIDEVVIDEVVVDEVVVDEVVSEESIYKTSNNRIYNTSNNRLRGSVTVDASDGRIRSAGRDSIWDSAMGGDP
FcTryp32	FRACYDRAFT_249116	5581	Scaff.KV784378: 17812-23392	332	4.73	36.7456	MKMVSHRFVPSTMPNLCALVFGLLFLADVEKYVAAIGASSSLDLEMSVTSRIREEHNGRMLRSENTGPGEFSFFTQWGGCGATLIWEDILLTSASCDVVEDNSVLIGSHASHQQEGDSVRRNIVSRYKHPKYDPDTLMYDYMILKLDEKVDTVPHVWIDPTVEIPTDAELFVVGYGFTASRIQINHIYEDTFHHTVLDTTEILRYGDDDGPKSRMQGLGLQKIEANIIPHGICNANDQYAGFVDDETMICAGNRDEACLGDNGGPLCMMVNNECLQIGIVSFGESCAMGYRPTVYSSISAASAWIEKKQTFCDSDNLIALEGKKTYQGFFL
FcTryp33	FRACYDRAFT_140384	1332	Scaff.KV784378: 114711-116042	335	5.49	35.6833	FISDVVDQVGPSVVRIDTENHPAKGPSSKGDNNYSPPGSYIQQGQGSGLIFSSEGFIITNAHVVEGATKVKVVTLTDGRVYSCEVTGTDDIVDIAVLKIITPDDFPLTSNLNLPVAELGDSDQLKVGKIVVAVGSPGGLDNTVTMGIVSGRERSSMMVGVPHKLVNYIQTDAAINPGNSGGPLIDVESGQVIGINAAIRAHMEGTSFAIPINRVRDIMHDLSEGKEIRHGYLGCQLTTCTPNWARENNADIDSKSADRIPEVYGALVHKLYRKTSTHLGGLKEHDIIQRIGPETVRSASDASRLIDLATPGENIPFTVLRNGNERIISVKPKDM
FcTryp34	FRACYDRAFT_250139	5844	Scaff.KV784381: 597187-603030	1825	5.89	199.921	METAIATDTPPPPDDSVNNNGGSSSSSILLVDDNNDENNTNTTNNAAAIENPTTPVASSRAIIHGSSIAAVVMTPEAAASLVPEMARTRTMTTTTTASSSSNAAQATTTPILPILPRAPSSATAAVAPTSPNRISEDHTIYQQQQQQQQLQSPIPPVAPAVLLVQREGSAHSATSSRNNSTTVTAVATPYSYPVATFVTNLVRSVSENVRAEIRDHILPSSNNNSNYPQVIPQHTTTHPQQSQSQSQSQHLGELSSLRPTLNVTATATMTASSDDNNNNNNNINTLTKPISSTNDDTTVPTIPAVQSSRMAASNFEDDNQVWSLIDGELVALPTQDDYEDDGDGDDEGEDCIQDECDFMQQHDRYNKHSRVQRGVRKIKKWRNIIGVSRAVGGGGQKKR…
FcTryp35	FRACYDRAFT_250947	1044	Scaff.KV784385: 357075-358118	305	4.6	33.3161	MSVMIGSHTIDNVDNIGENIDIDKFAIHPMNDQNGYVNDIMLILLRNSSKATPFTINRDQTIPKPMVDSMSVMGFGKTSENGTTFPDTLQVVDGIVAFSSKKCSEQWKLAMNETFLCAGTVEGGKDACDSDSGSPFIVNNNTVVAITGDGVGCGRKNIPSVNQRVSAFVDWIDENVCSLSNNPPSKCKTITVQQVDDVSEGKSKDGKKETTTDTTIAPSNSTQTTLAIDTNTYDSYFDETGDDDSYNTTSVITSTDKIKNFKESNLEIFTIILLGGGAIVLAYRYCQRFREKRASYERIQEYDV
FcTryp36	FRACYDRAFT_251434	1146	Scaff.KV784387: 566758-567903	382	4.27	43.3699	MLSSTTSTNNNLIVVVATTVLLLFGIGVVTAFTTSTSTTITRTTRNINIIPSFQEIQSQERRRRRQNNHYHHRLYHRSTIHEEDIDKEEECDDDDDTFIDIEDSSPSSSSSPSPASLFWPSSQQKTTYNKHATATAAVDEVVKQQHPIDHYDKIFDSIVKIYSTHNKHPDMMMPWQKLGSYTSTSSGFIIQNKKIITNAHSIEYAGQVLVRKRSSNSKKYHATIEVIANECDLAMLTIEDDSFWYNDDDEEYDEEYEDAEFDDDEELDDDEDEYDEDDNNNNNNNGIESTTQDNNDEEDDEYGYEYDDEYNAVKMNTMMIQPLEFGTLPELQDEVEVIGYPTGGDSLSITKGVVSRIESTEYVQCSGSHLLAIQIDAAING
FcTryp37	FRACYDRAFT_150995	600	Scaff.KV784393: 522614-523213	154	8.32	16.5942	EKRRIEVFQRNAPSVVYIDVIAERQDVFSPNAVDERIGTGSGFVWDKDGHIVTNFHVVRNSKFAQVALITPLFKARIIGVDPGKDIAVLKIDAPEEILYPIQVGKSLGLIVGQTALAIGNPFGLDHTLTSGVISGLGREVKSPIGRPITNVIQ
Cmtryp1	16992560	1509	Chr.NC_010130.1: 20700-22208	503	10.26	53.6693	MQSTGNTLLGRSCRLLRLRLQLHNHHRPQQQQQQQSIRLIHRTIPSWNRHGGAKSSESYARTPERRGARYSSVTSWQAKCLPSLRGAPGRRNSRWASVLNSALLFVSGALVVTLPSWCSTEWWRLPLGSFWKRFQAQAAALGDALSAEASAAQPEASAGLPSIRDKPLTRFAIADAAARVAPAVVNITVTVSTGDRWLFGPFAPPTTLAQSTGSGFIFDSNEGLVLTNAHVVAEMRNAPQTSALTVTLQDGRSFSGAVESVDALTDLAIVRILDPGTDLPAAELGESSALRTGEWVIAVGSPLMLANTVTCGIVSATNREGFEIGFPVGAPRLAFIQTDAAINIGNSGGPLVNLDGHVIGINTLKALSSDGISFALPIDLAKEVIRQLRQHGRVVRPFL…
Cmtryp2	16994792	1551	Chr.NC_010138.1: 204668-206218	517	6.83	55.4319	MQAAAALSSSQNGPTEAQGVLVGHPVLQEAPIEASVESQLEQLAKREDVTASRVYYAARSAVVHISSMESLRAAARRGFRKLWPPFPYGPESPDDEDDTEDEDASAARAAEPSEPEPKRGLPEPPLASPHERPEEEWILRGTGTGFCFDADLHIVTNAHVVAGASRYWVRFISGDQVPAQVLGLDSEHDIAVLQPRWEGASSDQSAPLRELAALPSDAPRTLSNAVASRWSQGANLTVRKRLLETIQPLRFGDSTKLLVGQRVFAIGNPFSLEHTLTAGILSGVGREVASRRSGGIPMFGLLQTDAALNAGNSGGPLLDSNGCVIGMNCAIASPSGAFAGVGFAIPIHTVRRVAEEILTRGRASRPGLGVTFAPTALTRRLGIRRGVLILNVLPDGPAA…
Cmtryp3	16994582	1533	Chr.NC_010138.1: 466758-468290	511	9.2	55.4604	MRSRNATPPCFVQKLFRFSRKCTSFQQCASVQIVKREAPGSRVVVALAFNYHNCQAAPHVGSEFRQGEVAQRIVKYRTSDGGERAVSVRIFGKAKENKQQHVEPPSQQPLQKLPTQQQEQKPEATASDFTAQNRRLSSSFVTKAVKLVGPAVVRIDTERVVQLPADPVLEDPLFRYFFGDEFQRQLPKERTERGQGSGFFISSDGLLLTNAHVVAKASKVTVTLIDGRSYPGKVVGTDDLLDLAVIRIDTHSEKVPTAPLGSSGELQVGDWVIALGNPVGLDNTVTLGIVSSLNRSSAEVGIPDKKINFIQTDAAINPGNSGGPLVNEFGEVVGISTAIRPNAEGIGFAIPIDTAKAVLDMLAKGEKVQHPFIGIQMVTLTPELAKQNNQDPNALALIP…
Cmtryp4	16994897	1791	Chr.NC_010139.1: 739425-741215	597	5.73	66.614	MKKRRRGEVGSKKRGSTGALRSPGYDESSDADAATPIVRPQESDEENSHLPSFVLDSILKVFSTHCTPNYSLPWQMRKQEYSTSSGFIIDGNRILTNAHSVENFTVVRVKKRGSAEKVTARVVAIGDECDIALLTVDDPTFFEDTCPLSLGSLPQLQDRVTVVGYPIGGESISVTEGVVSRIEIQQYAHGATELLSVQIDAAINPGNSGGPALNARLECIGIAFQSLSAREAENVGYVIPTPVVNHFLTDVQRNGRYTGFCSAGIDWQALENSALRRFLGMDASETGVLLRRIHPLSGATAVLQKNDVLLEFEGNRIGNDGTVQFRKNERINFNFLVKEKYVGDECDLRILRGKTRLDVRYKLDESSSSQLVPVHEKRRQPEYLVVAGLVFVVLTEPYL…
Cmtryp5	16997871	1425	Chr.NC_010146.1: 192320-193744	475	9.06	50.1972	MERETLPSGNPSNAFNVGFLLPVVREQWQLRALPRRFLMSRLRCGSVAGRTGTSAAAAGATATATADTVPGIRKLRASQKHLRALSSTCLSRGLGRTFASLLGAALWCVAPGDHSAVSALSLPSAPNYVLPVTEAVAATQSATYTESDLSPEEKATVALFERNRDSVVLVTTLIERRDFSSLNIMEVPSGNGSGFIWDKDGHVVTNFHVVRQAEAARVTMADGKTYPARLVGYDADKDVAVLKIDAPTETLRPVTLGSSAGLHVGQRAYAIGNPFGLNETMTQGIISGLGREIRSPTGRPITNVLQTDSAINPGNSGGPLLDSQGRVIGMTTAIYSPSGASAGVGFAIPIDTLKTVVDTLIKYGKVTRPMIGISYLESSQAQILGINEGVLVLDVPQGS…
CrTryp1	CHLRE_01g013300v5	6578	Chr.1: 2402347-2408924	740	6.37	76.71	MPLQGRLLGASGPPAAHPSPASSLRTRNRAFCSAAPAAGAGWPLHSPSHNERGQPLAQLPHGAAAPAGRDWAPQPLSVTGGSSGVSAGAVGAASSSSSGGAAAAVGGWQAAPSLVPRVTTDDMLLSSDGAAAAASTSSAGGAGAAAAAAPSRRGRRGTAAAASGPGAAAAGGGDGGSSAAEDVAEPVVVHMSAAATATAAAGTMPAPRHTGVFQPSRSYSQHIKSDGELLAALAEAPLAYAEGMGSVLDSIIKIYTVHSRPNYTLPWQNHPKRESTGTGFVVHDRLILTNAHVVADATYVLVKRHGSGTKYRADVQAVGHDCDLALLSVTDEAFWSTPTSMLPLELGEVPELQQGVVVVGYPTGGDNTSVTSGVVSRVEVAQYAHAASHLMACQIDAAI…
CrTryp2	CHLRE_01g028350v5	5218	Chr.1: 4231664-4236881	437	8.91	44.18	MERAFKTRTSGQGARPCQRCSRFTRSAVCVQALGRGEDHELNCTTRRGFVARVLGGAVAGGVGAVLGDTRPAGALTLEQVTPTVVPAPALPPREAAIVSAFERANYSIVNVVDLLLPGRAAANPEVDIPEGNGTGLIWDGEGHVVTNYHVLLNSLKGLSGPNPAANRPKVAKVTLLNAAEGGLEQTLDAVLVGVDRTRDLAVLQLVAPPAGALRPAALGSSATLRVGQQCLAIGNPFGFSHTLTTGVISALNRDIKSQLGTTIPGGIQTDAAINPGNSGGPLLDSSGAVIGINTAIFTPSGSSAGVGFAIPVDMVKSVVPQLIANGRVVRPSLDAQIAADTVAARLNVGRGALIQAVTAGGAAEKAGLLPTRRGLSGIVAGDVIQAINGRAVNSAGDLL…
CrTryp3	CHLRE_01g038350v5	4382	Chr.1: 5449806-5454187	402	5.32	41.16	MVSRERVVKAVHAVAPRGSRARLLLFLESLPAEELAQSCVTDADDDELIYDYIALKAQGGSSTGAHPDAEHPRDQQQGPAGAMASPEAALNLDSLCPRGAQAAKCVVSRLMHLGKCIGTAVRVAWAAGDEPMGDIVLTARHCVEEGGACLSGLCAFDGDLAFLAARPDLDVAVFRGPRGRGLRLMQHALLPGGDIWLLSFPLPVELEFAATSAAAAGAGGAAAATAATADEVPTVDRGTVSRIGPTGLSAVASFNTGMRDSSGGAVLCGPCALAGLYTCLLWHLQGLGEAGSSTSSSSGGASASSTPPATVERDPACMWTPPPDAAVDAVDAAAGDVGKAAELSWINIPHKSCASMFTTATALWQLLQQVGEGPRDPLEVAQTAATALTRRLTKRGRRS…
CrTryp4	CHLRE_01g042300v5	8988	Chr.1: 5932743-5941730	1905	5.21	194.69	MLSIGRGLALVLLFLGAFSSGVAAKRSSRVGSAAGAWDCDECPEIAAPVCVAGVTFRHACLAACQGLPSGANGPCAGDKLIATATGVLDSDPEAAAADVASTSLQGSADATAVSSSGRGAAAVSSRSSAAGEDSGKHHKRKHARGQDMHRFRQHGFVLVGSLPLASAAEASPQAPPSQPPSQSKGGSGDGGGGNGDGGGGSVDSDDTILGESSWDPERANMRTPKSRFNPGSSSSRDGSSSSSSSSSSGSDGMQVRALRYSVADGLLYAELAARPALEPAVRRALSAATSLDGAAWLAPAAGGDQDQDQEQEQELGRFESFEAMATTNGSVEDGGASAAVAAAALAGAGYSKRGSGRAAGPLELLEPESESAAGGLLRRQWQVPRQQQAQPQQRQRHRR…
CrTryp5	CHLRE_01g042352v5	20141	Chr.1: 5943530-5963670	4951	4.39	495.65	MLLLAFLIGAQAIAAPPPGVPAPPDAADCSSCGATLSPVCTSGGLTIANACLAKCQGLLDFIDGACNADPLFQSLAAPPPPAAPVPPEPAAQAADAVVEQGSIVDTEAVTRYWTEGFVYLGLAADLGVAGVPETTDPAAERRRRAMQELGSSELLFRSFRLHADGSLYAEARPWALDVSSLGSERQGSVTDAELLRRRERHRLLRQQQAQQPERSRGNGHEGENLEQQQWESASDEGDDGQAEERQQAPPASLHRAVAGQGVRRRRRGLLQKEDARYPVRDTGYWPNNAVVQMYFVTTGTNTATSCSGTWVSGYDVLTATHCVYNWAAGATYTNFVIRPAMSGDVWNGTYKAVFTTWYRSEWNRTNYLNEVNYYDIAMIRAEASDTATIMPYPTYLGYK…
CrTryp6	CHLRE_01g042502v5	20236	Chr.1: 5983951-6004186	3851	4.64	391	MPPEELLPLVAQADAGRGVSLGPPPAPPNSPPPPEPPAQPAAQAADAVVEQGSIVDTEAVTRYWTEGFVYLGLAADLGVAGVPETTDPATERRRRATQELGSSELLFRSFRLHADGSLYAEARPWALDVSSLGSERQGSVTDAELLMRRRERHRLLRQQRQQQAQQPERSRGNGHEGEDPEQQQWESDSNEGDDGQAEERQQAQPASLHRAAAGQGVRRRRRGLLQKEDARYPVRDTGYWPNNAVVQMYFVTTGTNTATSCSGTWVSGYDVLTATHCVYNWAAGATYTNFVIRPAMSGDVWNGTYKAVFTTWYRSEWNRTNYLNEVNYYDIAMIRAEASDTSTIMPYPTYLGYKYDCAKSLYSASTCGYPNDRRLGDFAASASYTQMCCDFSFPGTTCQ…
CrTryp7	CHLRE_01g045601v5	15096	Chr.1: 6400287-6415382	1682	5.35	168.59	MSDAAEGSSSDGSSGSSSRGAGVDVVTRFATEGFVYAGHAALSDEGPTGFDQGGFVSKLTFDDSTGTGGDGDSSAAGGYKEAADSSTTTIGADGSSSSSVRSSSSSSSSSASVTQSIESSGDSGTGSGRGWAAALTEQGVPTQLRVRAVRVSPDGAVYIESSGVDLDLTQLPASAQTESKSSFEELDGLDPNGLDQSSPENATKSAALVGLASRRRRRLLRRGGQEGAQPLAGDWEADEASELPDGGDEDADGWFAARRRRLDQRRRRRLVDDSYRSDTGVWPYRIIGQLMYKVNTLAYICSGTWVSPYDVLTAAHCVFNITSGQAHRDFAFTAAKAGTTGPDGTVRYSSVTFYRAEYPRAKGDGVNYFDMALLRMSAPGPGAYMGIKYDCGQIDYPKT…
CrTryp8	CHLRE_02g088400v5	4732	Chr.2: 1996894-2001625	432	5.17	44.39	MEPEASQSPRERFLSGAVALLGTASLLVGAVTVGPSPVMAKPRMTPEEQLTIEIFRKNTPSVVNVTNLAVKRDAFTMNMLELPQGQGSGFIWDATGHVVTNYHVIQDASDIKVTLSGGEEFSAKVVGVDQDKDIAVLQIGPIGPPASEAQGDGSSKPPQQLLAAAPGAAAPPSAAVPPPSASSLPPGAVPVAPPPPEPVRVTPLSLCSSSADIVVGQKVFAIGNPFGLDHTLTTGVVSGTGREIQSISGRPIQDVIQTDAAINPGNSGGPLLDSGGCLIGINTAIYSPTGANNGVGFAIPVDIVKSSVGQIIQYGKVTRPILGISFAPDQSSEALGIKGILVLSAREGGPAWRAGLKGSSRDEYGRLVLGDIITAVNGVKIKTSSDLYRVLDKSAVGDT…
CrTryp9	CHLRE_02g088400v5	4732	Chr.2: 1996894-2001625	433	5.17	44.46	MEPEASQSPRERFLSGAVALLGTASLLVGAVTVGPSPVMAKPRMTPEEQLTIEIFRKNTPSVVNVTNLAVKRDAFTMNMLELPQGQGSGFIWDATGHVVTNYHVIQDASDIKVTLSGGEEFSAKVVGVDQDKDIAVLQIGPIGPPASEAQGDGSSKPPQQLLAAAPGAAAPPSAAVPPPSASSLPPGAVPVAPPPPEPVRVTPLSLCSSSADIVVGQKVFAIGNPFGLDHTLTTGVVSGTGREIQSISGRPIQDVIQTDAAINPGNSGGPLLDSGGCLIGINTAIYSPTGANNGVGFAIPVDIVKSSVGQIIQYGKVTRPILGISFAPDQSSEALGIKAGILVLSAREGGPAWRAGLKGSSRDEYGRLVLGDIITAVNGVKIKTSSDLYRVLDKSAVGD…
CrTryp10	CHLRE_02g092000v5	5016	Chr.2: 2475789-2480804	644	6.26	68.36	MAAPAPQSSRSGFGSAAGLQPHLTNSVCTVMPPPSPSKRMRSDSFDHIDPRALPAPAAAAKPAAAAATDPEAALSKALKSVVKIFCTSANPNYALPWQMMAQSKSTATGFVVAPLNSRRILTNAHAVTNQVQVMLRKHGNARKYPARVLAVGHECDIAMLTVDNDEFWTGDMEALEVGQLPSMQEAVMVVGFPTGGDNVCVTKGVVSRLDRQVYSHGRCALLTTQTDSAINSGNSGGPVLQGAGKLAGIAFQSLIGAENTGYVIPVPVVNHFLTDLERHGGRYTGFPEMGMSWQTLESTSMKDSLKLPRGATGVYITSTDPCYNASKELRVGDVLTHVQGHSIADDGTFLFEGQNVRIDFRHLSSMAYDGESLQLRVWRDGAAHELSVQVSVPKHLVLP…
CrTryp11	CHLRE_02g110600v5	3458	Chr.2: 5761800-5765257	270	6.9	27.01	MPSRQAQAASFVDDAISTAVYNASAPSVVSIAIVRAKSGIPTREPIGSGIVWDTAGPHVVTNFHIIPPLNSTNSLLEVTVTDLASGTVHTLGARVAGTDSIHDLAVLQLLPRAGDTTAGAAEGEPGASGAAAAWVPALAPIRLGTSADLRVGQTVYALGCLPSSSSSPQTPALTTTMSVGLVSGLQRSIPSPVGARIYGVLQTDAVINAANSGGPLLDSAGRLVGLNAAVGRSQTVSARGSGVGFALPADLLFDVVPKIILYGNPYGKK
CrTryp12	CHLRE_02g143427v5	6602	Chr.2: 9124376-9130977	253	6.59	27.4	MSQWMIRDTDEPEIIAAFVRARAAKDGDTTAHTDQGKGDQLDDNIVQQQLGATRKFTGQVVHEFTDPKTGKACQMPSCVTLIDTKYAATFAHRRTWKEGQDVELKICSGTDPNSMRAVKAKVFHINPKLDFALLKLTDEELQAPNIEPGPRNGMKFFGHGLSCPGGTSSNVCRGVITRARMVGNRHIALDRISGKGDPGGGIFSAATGRLLGVLVGRDSDLDKSYMIQANVLLAATVEETFDPDPPPSGQFW
CrTryp13	CHLRE_02g143527v5	6294	Chr.2: 9167966-9174259	254	5.13	27.48	MSQWMIRDTDEPEIIAAFVRARAAKDGDTTAHTDQGKGDQLDDNVVQQQLGATRKFTGQVVHDFTDPKTGKACQMPSCVTLIDTKYAATFAHRRTWTEGQDVELEICSGTDPNSMRAVKAKVFHINPELDFALLKLTDDEELQAPNIEPGPRDGMKFFGHGLSCPGGTSSNVCRGVITRAHMVGNRYIALDRISGKGDPGGGIFSAATGRLLGVLVGRDTDLDKSYMIQANVLLAATVEETFDPDPPPSGQFW
CrTryp14	CHLRE_02g143527v5	6294	Chr.2: 9167966-9174259	290	5.1	31.4	MVSRTAVDKALRKKGLVEASELGVLLAFLQDQSDDQMSQWMIRDTDEPEIIAAFVRARAAKDGDTTAHTDQGKGDQLDDNVVQQQLGATRKFTGQVVHDFTDPKTGKACQMPSCVTLIDTKYAATFAHRRTWTEGQDVELEICSGTDPNSMRAVKAKVFHINPELDFALLKLTDDEELQAPNIEPGPRDGMKFFGHGLSCPGGTSSNVCRGVITRAHMVGNRYIALDRISGKGDPGGGIFSAATGRLLGVLVGRDTDLDKSYMIQANVLLAATVEETFDPDPPPSGQFW
CrTryp15	CHLRE_03g168300v5	3271	Chr.3: 3582539-3585809	192	7.74	19.87	MCPLLVKICAFSRDGAPAGEFSGFQYSTSSNTIVGAAHMVGFSGLPRGSGPLAEMFKARYADGFEEVVEVRNSAADQLPDIAILCGSRPAPRPMVGAHCNTGDTVYALGFSPHFTTPSFSKGIVSNSKIGSITITAHADNGYSGGPVVNTRGQLVGTIKGGTLHTTMQQVNVTSAEQVHVFLLQSKQPGLG
CrTryp16	CHLRE_03g180650v5	8336	Chr.3: 5022100-5030435	1109	5.94	118.66	MSLEETEPLVEPTTRGSPEDWKRSLEKVVPCCVVLKVTQTRAFDTEAAGSAYATGFIVDKQRGLILTNRHVVTPGPIVAEAIFLNREELPVVPLYYDPIHDFGFLRFDPSRLQFMEVSEVPLAPEGATVGLDIRVVGNDSGEKVSILAGTLARLDRDAPVYGRKGYNDFNTFYLQAASGTKGGSSGSPVIDCQGRAVGLNAGGKNKAASAYYLPLERVVRALKLIQASKDACDKPGVWPAPVIPRGDLQTTFVFKGFDEVRRLGLQQETERRVRNSKTAPGPEGAQHSTGMLVVDSVVPGCACDGVIEAGDVLVELNGQVVTHFLALEELLDDAAQDRMGGGSGKVQLLLERGGKPIRAEVDVTDLHTVTPNCFLELAGGAVHALSYQQARNNRAVVGQ…
CrTryp17	CHLRE_03g187600v5	2267	Chr.3: 5673771-5676037	291	6.16	30.57	MQELKAWLQRQLGPPLFEKLSEGDIAALHLAGYDGELLGCASRESLLQLKLTLPVVDMLLAKCGARPRPLGRESTASDGGTDAAANAEPPPTFASMASYTSRFAAHIPTPSGKAAATVVGRRHLATYAHGAHSSWTLGQKMQVAVHSPYADRRQHVEAEVVYKSVRIDLVLLEVQQDLPCPELEAGTPAGDTFIIHGQLSPHPALRENYDNTCVCHGWVAATSPDNRSHIRGHSSSGGADSEGGGCFDVATGRLFAIAMAAISGSNAVTMLPVIVIVPILAGLRSAPEAS
CrTryp18	CHLRE_03g206250v5	5284	Chr.3: 7373620-7378903	264	5.79	27.2	MLLATKSMEQASVHVSGDANVAAASIKALLATAGSAIAAAEEDDVIAKLAAETRRFTGHVLHTVKDPVTQMDAIDPKTGQAVLVPTCATVITPKCLATFAHDRKWKGGDEVEVKLHPAADTTSMRAVKTKVAIINTNADFIILEADTELQAPDMDAGIKAGTKFYGHGMSSPGHAANVYRGVITSANVEKYGLVFGDIASGKGDSGGGVFSATTGELMGLMVGRNRGLQKSCIIPAASLVTIAVALSKEGPMDPDPPPSDLPF
CrTryp19	CHLRE_03g203730v5	5322	Chr.3: 7686710-7692031	790	9.32	79.93	MVGGIVGVPLSRCRLDSAAASALSSTSRSSAAAAAAAATRAVAAAATARPCVATACSPSGSASSWAAASACRVSTGPHASASLAGAGGEHAGARGAAWVCHATRPVRKPPLRMRAPPPQPEDGAESGGATGDDDLALKEAVAAAAAALLPGVVRVTCVQDLPRFDMPLLLGTFRSSTCNAVAVVHGGQRYLLAPSAAVAYGSQVRVYLPGREKPFPARVAHLAVDCELAALELIGSSSSSNGSNGSGSSSSSSSGGSAAAAAAVEEFWGALQPYQLADQGLPALQAAVGVVSYAEAQPQPSLSPGTVMRTEVITYPSALQRLLGLTVAVAISKEQLGSAVVDGRGQCLGVVFGRTVGSGRRKGGGAGSGAGSGGSGGGGSDSRWGQGRRRVGRRRGRRG…
CrTryp20	CHLRE_03g200655v5	13002	Chr.3: 8484877-8497878	1425	6.04	144.56	MTSLLSALGRRASAGTPLGRPAPGGSTLPAVAPAAAASPALPRRTCCPTAALSTTASSACGAAPGISAEPLPQLASCPSRISSSRSGGRRSRVLLAAPPRSTGNGQVGPPQHRKGVVAPGAGAGAAAASAAAPAAAVAAAVDEEVADDDEDVLMDEDEAGQQLAPFMDAVVKVYCMHTEPNYSLPWQRKRQYSSSSSGFVVSHGGRNWLLTNAHSVDYHTQVKVKRRGDDRKFLARVISVGVDCDIAALQVDDPDFWAPQSPDSPPPPVLELGPLPRLQDGVAVVGYPIGGDTISVTAGVVSRIEVTDYSHGSTDLLAIQIDAAINGGNSGGPVFNRACQCVGIAFQALVGSDVENVGYVIPTPVVAHFLDDYTRTGGFSGFPQLGIQWQRMESEALRR…
CrTryp21	CHLRE_03g200655v5	13002	Chr.3: 8484877-8497878	1330	5.93	134.74	MTSLLSALGRRASAGTPLGRPAPGGSTLPAVAPAAAASPALPRRTCCPTAALSTTASSACGAAPGISAEPLPQLASCPSRISSSRSGGRRSRVLLAAPPRSTGNGQVGPPQHRKGVVAPGAGAGAAAASAAAPAAAVAAAVDEEVADDDEDVLMDEDEAGQQLAPFMDAVVKVYCMHTEPNYSLPWQRKRQYSSSSSGFVVSHGGRNWLLTNAHSVDYHTQVKVKRRGDDRKFLARVISVGVDCDIAALQVDDPDFWAPQSPDSPPPPVLELGPLPRLQDGVAVVGYPIGGDTISVTAGVVSRIEVTDYSHGSTDLLAIQIDAAINGGNSGGPVFNRACQCVGIAFQALVGSDVENVGYVIPTPVVAHFLDDYTRTGGFSGFPQLGIQWQRMESEALRR…
CrTryp22	CHLRE_05g248401v5	2814	Chr.5: 775373-778186	405	8.1	40.44	MARGSCRGNVPRAAPVLALLALALSSQLAPATVWARTSGSLHSSNAVRRRALLEDKAPRAAHSPSVDSSLDGKRRSVSSDNSSNSSSDDAIPRSSTHAPTSPAPAQQGGGGADSSLLALTRVRSPAPYPVRLVGQLRNGCTAFLAGPCHVVTVAHCVYDPERRIWWPGLEFSAGRNGAGDWDPEGSVTWRAAEVPDGWKRRGRSGGGGGGGGGGSGDGSVDGEGGASAAAESSAAAKAERYDVAVVVLAEPLGRRLGWMDVGCGGGGSGGSGGSGSDSGSDGGSGGGCAPGPSSAGPSRGGGGTAWVQVAGYPDNRPNGTLWTQRCRLRTPRPPPPPGPALLPGTSPAPAADEGAATNSSSSLEPLMLTTYHDCDTRGGNSGSPLWAVPAPDGHSFPSF…
CrTryp23	CHLRE_05g248401v5	2814	Chr.5: 775373-778186	492	8.95	48.91	MARGSCRGNVPRAAPVLALLALALSSQLAPATVWARTSGSLHSSNAVRRRALLEDKAPRAAHSPSVDSSLDGKRRSVSSDNSSNSSSDDAIPRSSTHAPTSPAPAQQGGGGADSSLLALTRVRSPAPYPVRLVGQLRNGCTAFLAGPCHVVTVAHCVYDPERRIWWPGLEFSAGRNGAGDWDPEGSVTWRAAEVPDGWKRRGRSGGGGGGGGGGSGDGSVDGEGGASAAAESSAAAKAERYDVAVVVLAEPLGRRLGWMDVGCGGGGSGGSGGSGSDSGSDGGSGGGCAPGPSSAGPSRGGGGTAWVQVAGYPDNRPNGTLWTQRCRLRTPRPPPPPGPALLPGTSPAPAADEGAATNSSSSLEPLMLTTYHDCDTRGGNSGSPLWAVPAPDGHSFPSF…
CrTryp24	CHLRE_06g267750v5	4646	Chr.6: 2378925-2383570	650	8.86	67.91	MSKSRRIGLARLQPVRSSLVVAFWLLLAVSRLAGAADAALSEESFDCRAGCKRAFKPACGADGRTYASACLAKCQGVQVAHHGPCEGEDVLHPSNCNVVADADAAGRASPVLTPRRLEAFAHEGYRYAGQLTLTGEPVRPQARSHSQRPAAGASSTAQQPLARAMRVTREGHVYFADIDETVAAVLDDVISRNANASDGKEPHVHALLHNLRQWRDYHSGGRGGGAAAGGGAGGGKWKKGASVAAGSGDAVTREHTLVPGLVDAKVAGSSSGSGSVAAAAAAASGGGKSAGASKVDGQGRKKQTQKQAAASNAFWKFWGQQRKDDGQDAGQQQQQERGGQGNPGISSSAAAGGSLHRQARRSLGIFDGDDRVDCPRTPTYPFTAVGQINVRDSTGNYVC…
CrTryp25	CHLRE_06g293516v5	9822	Chr.6: 6562451-6572272	1200	5.18	118.17	MAGPASVPALGASGASLGLGRCPPAWQRGGGARRTRIYSGNCAWPQPAALPATAQPTLPISTRYRGCCAAVAATPAAATAAARSSTAVAATLAPASSQARGAVRLHATGGRGRGSGSSSSSRGSSTGGVGSSSSRGGRAQELLGVGGEEEDEEEEEEEEEEGAWDEEEEGEEGVEEDDDDGAKVLGRSVVQVHTLHRVPNFLRPWEDGHDAESTSSAFVVEVEVEVPVPPSPSPSAPAPTAAAGSGGSGLRSRGRSSRGAGPGGARPAARGVQPADAAAGAAGPVGVLTTRRVRQRLLVTTAGAVEHARKLEVSRSADAAAGPYPAHVAAVCLDLDVALLRVDDPAFWRSGSSSSGSSSGGDGSSSNGGDGSSSASARERRRRLRAGGEGGGGSDDQSW…
CrTryp26	CHLRE_07g332050v5	3647	Chr.7: 2834809-2838455	285	5.88	30.13	MCSVLRGFGADLKQLDDSAVDALWKAGYRSEDLLQIATHKGLKDAGLLPAYVDYVLSLKGGGSRSAPDAGQPRDQQEDTGMQRVAASSKFTGRVPYDKVDPKTKQVSRLPSCVIVIAPKFAATFAHHRTWSEGQDVELEMYCSDANSMRAVPAKVFRIDTRVDFVILKFVGEELPAPAVAGGPQAGTGFYGHGLSLGGNTANVYHGIVARPAAGSRGHVALDKLSTKGDSGGGIFSAATGQLLGMMVGRDQEREISYMVPAAVLLAATAEDNFDPDPPPSGEWM
CrTryp27	CHLRE_10g464400v5	3376	Chr.10: 6210375-6213750	510	9.49	49.82	MRVGGDSNNSSGSSTSSAAAASARTTAELPNTGSSSLTPSAGSAGRMRGGSEHTPQGRSGGGGAAGSGGRHKQQKQHATAAAAACVLAVLCALSGTGLAARSSSEVSAGGSGDAGQSNAGSRRAQTQPPHLQTPNSQQPQQPPRLGGGASRAPPRLLIQGGAKAAAGAYPFVAVVSRLDGSYLCAGSLVHPRLVLTAAHCVTPAVGGTANPRVHLGLDRLEPGATIENRGARLMAAGAAALAALVGLGSTGGVAGGPALATRSLPHPRYNPGNFDFDAALLVLERDAPAGARVVRLPDPAGDLPQSAAGGGDPGLTVLGWGSTEMGVLSQDLRSADVRPLPVATCGLLFGPYGTVMTPRMMCMTGRTCAGDSGGPLVLRGSGGGRGRGGNMDDDFTLLG…
CrTryp28	CHLRE_12g498500v5	3942	Chr.12: 3243769-3247710	463	6.47	47.65	MAVSASATQRSGPAGSEPADQPRIGPLALAAGTALCLMLGSGFAPEGSSGALAPLGALAVRPAHAEATTLKGTPMASRAADLTAPSVRDAVPLQRNIDPLTMQLPDAPPDLTPEEVRAIRIFARNTPSVVNITNFRQVPVQSVYGFGRGGFSMDTEKVPAGLGSGFVWDDKGHIVTNYHVIKGADEVKVTLLDQTTYTAKVVGGDADKDVAVLRLVDAGDKISALTPVTLGSSAQLLVGQRVFAIGNPLGLEHTLTSGIVSGLNRELSTGTLTIKGLVQTDAAINPGNSGGVLLDSAGRVIGINTAIADPTGKGASSGVGFALPIDSVRGLVDQILTYGRVLRPVLGVSLAPPQVLKQLGQPGVLVLEVPKGSPAEKAGIKPTMRDRFSGSLVLGDIIT…
CrTryp29	CHLRE_12g548200v5	5916	Chr.12: 8454558-8460473	1250	8.3	122.78	MSSSLESVLVLISGEESADDPSQALSFVTRAQDLSFTSCSGILLPDGGSGGRLVLIPASSLARWLKPGAKWSLTSRSTAPPPLAPGCAVCAAGSVALGSGRAALLVPIATFSVPAAQRAASALLHGLNRDATSDAARWNFAWSIAATAEASPAEQGAYVLCLAQPLPDAPRAPPAPPAPVLHPDLLASVAPLLRSLRALLLPPGGAAASPCAACGAAQRSCCGACAAAAAGIAPPPGPGRLVTVVGSPFGCLAPFHFLNAHVNGAIACSFPPPHQHQHQPTGAMSGAGTAPAATTAAPPALASQQLQPQLQLQPALYALDAHVFPGMEGAPVTPLQLPLASLTGGLPAAAPPGASASSATIPSSQARSQGCGGTGCGGCGGCGGCGGCGGCGGCGGCGG…
CrTryp30	CHLRE_13g568100v5	5676	Chr.13: 940141-945816	798	5.95	79.32	MRDGSVGLPRPGRRRHQQARVLAALLLVLLQRPEPCAAASPRGLGPGCGQGGSCSGSATLLVAEGARGGGGGGDGGGGASGGGGGGGVARLHQQGAFILPPGYEAWQRHPPDGDDGGAGAATGSEAAEGAAAASGDTSSSRGRGGGTGSGGSRWRPPSVAAALAAALGRRTLPPDAEAAAPVGAAAAGGDGGSTSGTSSSSGGGSGTTSSTSGTRREVDSAAGTAASSARGGPDARPPVQQAPDSTSADAPPHRVQPEQVGHTQEGEWRRWDAEEVAVGAHGQRVAAAEAVPRHATVMYVRGRGTFVRRNPPAAAVAAAVPAEAAGGGGSRGNNNDELNQRRRRRLAQAQPPPPPAPAPADTTGGGDTGDNTGAEPPGGTNVTFTPSRLACKGCPPGDP…
CrTryp31	CHLRE_13g579901v5	8666	Chr.13: 2451976-2460641	681	5.62	70.72	MPPRKKVKAEAAVVEDAKAATAPSGSENGAVAIEEDPRPTSPRTRARNQTADAPLAAAGGAADAADGPGGGGAADAKRRNARRKYGGAGSTAAEADVALGATASGLPPKPPSGAAAAAASGGGGGRGGRGRRSGGGGGSADSDSVMDAVVKVFCMHVEPNFSLPWQRKRQYSSNSSGFLLPGRRILTNAHCVDHYTQVKVKRRGSDVKFMATVLSVGTECDIALLTVEDDKFWEGVEPVEFGTLPQLQDAVTVVGYPIGGDTMSVTSGVVSRIEVTSYMHGSSELLGIQIDAAINSGNSGGPAFNDDGQCVGIAFQSLKHEDAENIGYIIPTPVIHHFLTDFERHGAYTGFPCLGVEWQKLENPDLRTVLKMKADQKGVLIRRVEPTSACSAVLRQNDV…
CrTryp32	CHLRE_14g617600v5	6214	Chr.14: 1405319-1411532	620	5.91	66.12	MFQLSPINCPSTALSVPSSRPRRHSVWRATGRHSRLNTSLLKTRSYGNDYSELQQLELASAGDAGGELPLNGGSPLIGALGSDDDAPEARTSAGPAAAPPIIKVTGELRRKAWALSSVLKVFVSKVDPNYAQPWQMCPQRTSTGSAFVLDTKKRQILTNSHVVSNATAVYVRRPGAARKFKAEVVCDGKVCDLALLTVRDDAFWAAELRGLEFVDVPELQSPIAVAGYPVGGDNISVTKGIVSRIALVRYSATARLLSIQIDAAINPGNSGGPAFADLEGGKVAGVAFSKNVSSSTDNIGYIIPYRVVRHFLEDAESHGTYRGVPSPGFFTQDLENPAQRAYLKMPEGVSGVMVVKTDPLSAAHGAIQKNDVALEVDGVPIADDGTVEFREDERLEFSA…
CrTryp33	CHLRE_14g630550v5	8092	Chr.14: 3409315-3417406	824	9.1	79.13	MLSSSAPGPPNLCNSTRYRGIQSSSQLPQPCLGRTCPVSSLRQRAIPAPKASQQHQLLGARAAAPAALPSNSNADSHHEGPAVAAGVGRPLFSSGPSPQQQPPAHRPSSSVLAWLWTAFCSAASAVLRVLAAAFCIWLAGLAPRPSLATAAVSAGASEARVLSTNSASGLLPEAIATGGSSSSSSSSSSAGGGLSRSGVSGAAATVAAAHTNFSSGARAPTESEAEAAAARRLSGQDAGPSGQAHTLPRALLVGSGGGARHLRPSAAANGSSSSAGVASGSSSGGGAASGSSSGGGAAAASPVLGELSLSYEPTSGLAFSGAGAASATAFASSSAGAGALTRSGYSQGYSQGGSGSSSTSGGGGGGSSGTFTYGAASGYGSQQQQQQGLQPASVAAGVG…
CrTryp34	CHLRE_16g661500v5	6332	Chr.16: 2574385-2580716	620	8.73	66.22	MVSPRPGPATQKASTSCTLFLALLITSAVVPTFASAAAGRHARRARVLLADGSTAAAARKLAVQHDCTACPLTRQPVCSESGLELQNACLARCQGIIATEERCHGRSSINARVSGTAAQRRRQQGSAAIVDDAATRLTESEFSVGKSSMQRFRGEGFVMIAVRPPSDFGSGAKPAVSDRRFMQEGSAFNPLPTPLLTVSPPGLANRGVPDNAADPSEVTEYRITSDGQAFAKKLTGAEMAAYRSQRGRTSAGSDASRGAASEGSTPAAAPAAAPAKRRELEAVATVATQHAASHQEDREVDHQQVQEEESEYAAGINDVYVEEEVYDDGAEGEGENDAQEARAAGLQERRRQLSWVIPSRDDRIEETTDVYPGRASGRFTYRNPLDGLFYWCSGTLISN…
CrTryp35	CHLRE_17g725250v5	2936	Chr.17: 3526835-3529770	474	9.15	47.53	MDSVLCRELVEKGLGEDDLRLLRDAGYVNRERLNLATREGLREAKLLPAVVDIIKRCQRATDPGPGSGTGSGTSSGSGTSTGPSQPTAAQVSAPLLPPPPPPTGAILPVWEVFADGSKEFLGTLTIISADGVAVTARHVVLWGDGRMHPRRLFVGEGDVQARHLASFPVVDVTLLRLLRTTAGLLGAGSGDSGGAGGGRSSSSSSQGSGGAAPAAAGGVTGAAAPFPHMKIAPDESFAPGAQLTVYSYPAMAVWHNLLRSGPAPTHGLLSFFSPGQLMGLADCAGVPGSSGGAVTCGGKFIGIHIKAISHDSSGGDTTQPPPANSFIAAPPMPAASTAAPARPPAQELGEALEVMDDPMQRPRAGGTAAAGGAAAGATVAAAGSAAAGGRGRSMSMVGV…
CrTryp36	CHLRE_17g728976v5	4262	Chr.17: 4011716-4015977	999	5.64	95.82	MARHHCRHRHPDDCLCVATRFVLALLLLLPLLLPAPHALAVAAPATPAGPSHQHTRSGHDAAAAAAGDASPQRATGSCSDPGRGPGQAQAAAGAQPPDSSTRRETEEERAAVEAAAVAEVTGPQRRRVLDQRGAGKGEDGGGGGGGPKEAGKEQEYDTQSQPQPQPQPVRLPAAGMTAGSLSGDLLRRSEWRSGGAALLLVLGSAAAAAAAAAPAAALAGQQQQDVSGAGARNNTSSNMQNSSSNLNSSSSSSSSSNNGDLLRLPDVQRPLLAVASAASSGAATAGGGGGGGGISDRRWSLLQALRVQQECVAGRDPVLLPPPGPPPPLQLRLTPLAQPPSPPPPPPPTSSTPRLQLRRLLQPHPAVVDTASGTGGRGGGGGGGRGGGGGGSTRGGFFF…
CrTryp37	CHLRE_17g740600v5	10482	Chr.17: 5989648-6000129	1118	4.95	108.13	MRMPAATRAHRRTAAAAAMLSWICLACALSPVNGHQPTSTTPQMPQQQPQQQQQQQQQGVGSTPAVFEAATAAAATGDVAFASALFAELAAAGLAEAVAQAASASTPAESYWGGVALPEPGTGGSSTGSLSGSSSDVTDGESSSGVLAALGELLRAENALAEEALAAMWAGYSPAAAVAAAPEAAMAALAVAPEAAVPGPRPAGSRHAATMEAAAGLVLPAAAGAGLNGGGAAANAVSRRRLAFKKTPPPQTPPPAAPPVGASDKFSSSSSSPSSSSSPSTAANSTAGGISAVTGFWPTLLQPQLAAANTSADASGSNGSSSDSSSGSSSSSRAMGGRLGALLASRGVGGGILGAAGNTGAQDSLWLRIIGGSAADTQSHRQPQALDAAAPSAAATAAA…
CrTryp38	CHLRE_17g740600v5	10482	Chr.17: 5989648-6000129	1118	4.95	108.13	MRMPAATRAHRRTAAAAAMLSWICLACALSPVNGHQPTSTTPQMPQQQPQQQQQQQQQGVGSTPAVFEAATAAAATGDVAFASALFAELAAAGLAEAVAQAASASTPAESYWGGVALPEPGTGGSSTGSLSGSSSDVTDGESSSGVLAALGELLRAENALAEEALAAMWAGYSPAAAVAAAPEAAMAALAVAPEAAVPGPRPAGSRHAATMEAAAGLVLPAAAGAGLNGGGAAANAVSRRRLAFKKTPPPQTPPPAAPPVGASDKFSSSSSSPSSSSSPSTAANSTAGGISAVTGFWPTLLQPQLAAANTSADASGSNGSSSDSSSGSSSSSRAMGGRLGALLASRGVGGGILGAAGNTGAQDSLWLRIIGGSAADTQSHRQPQALDAAAPSAAATAAA…
